# Supplementary material for: Genome-wide association study identifies genetic loci for self-reported habitual sleep duration supported by accelerometer-derived estimates
Source: PubMed Central journal article supplement (PMC6405943; doi:10.1038/s41467-019-08917-4), 2019-03-07

sleepduration\_1

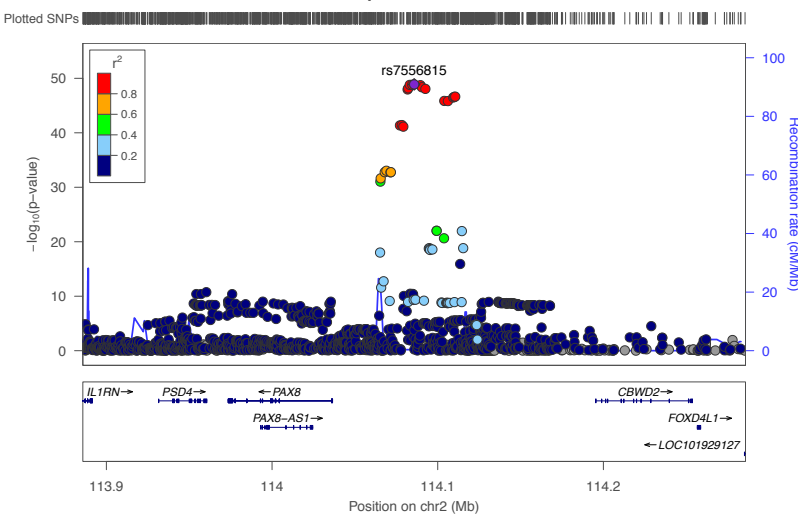

sleepduration\_2

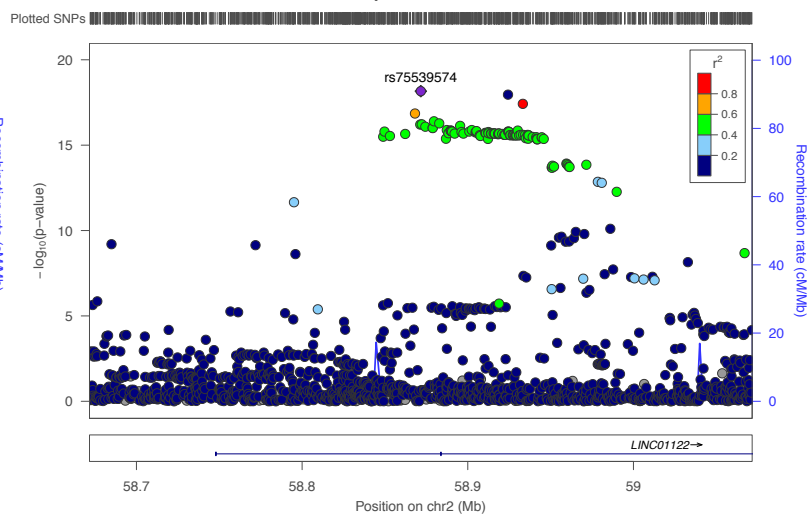

sleepduration\_3

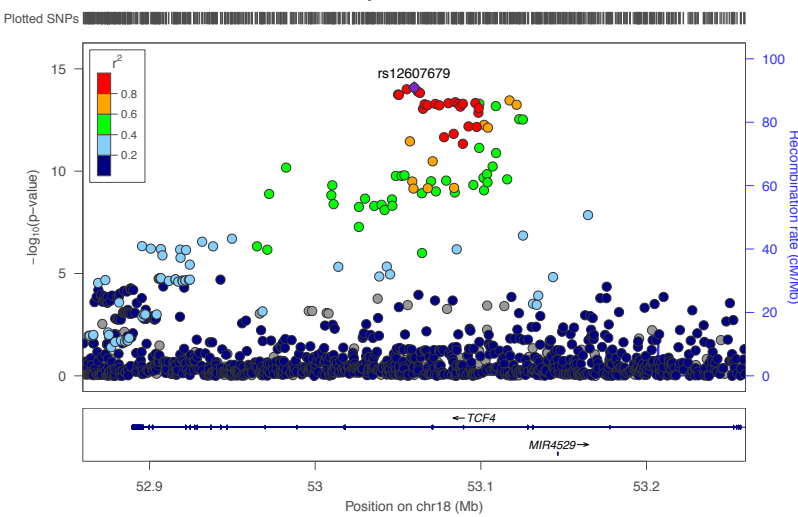

sleepduration\_4

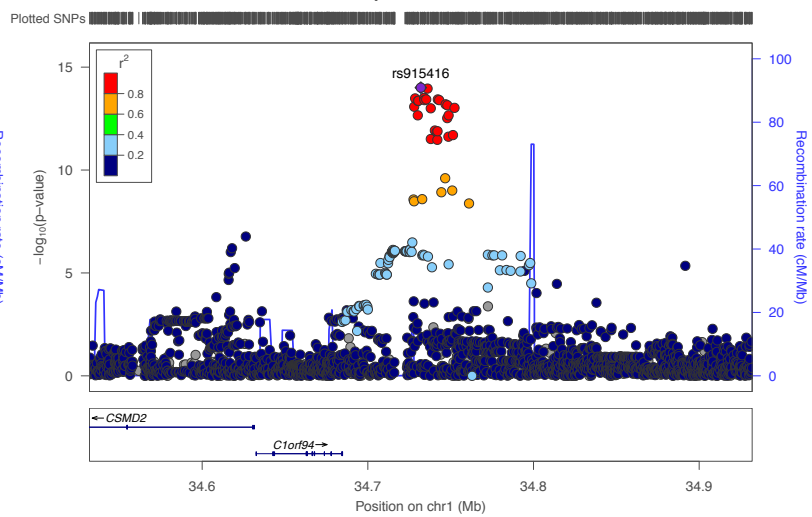

sleepduration\_5

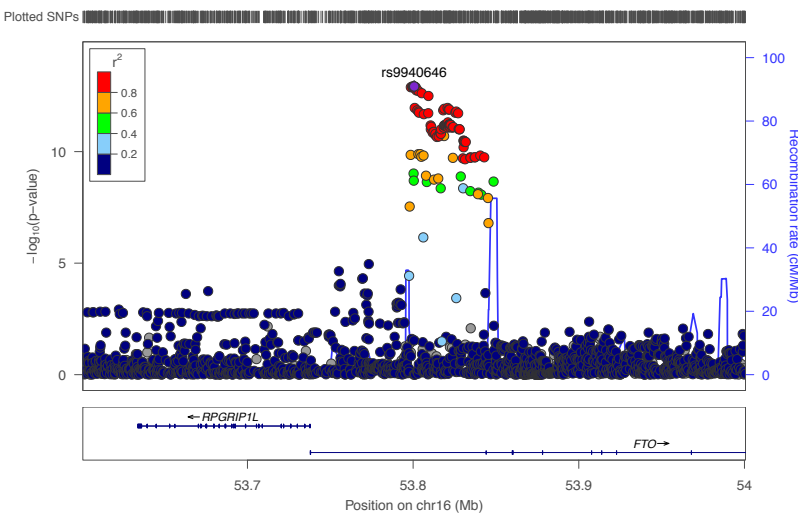

sleepduration\_6

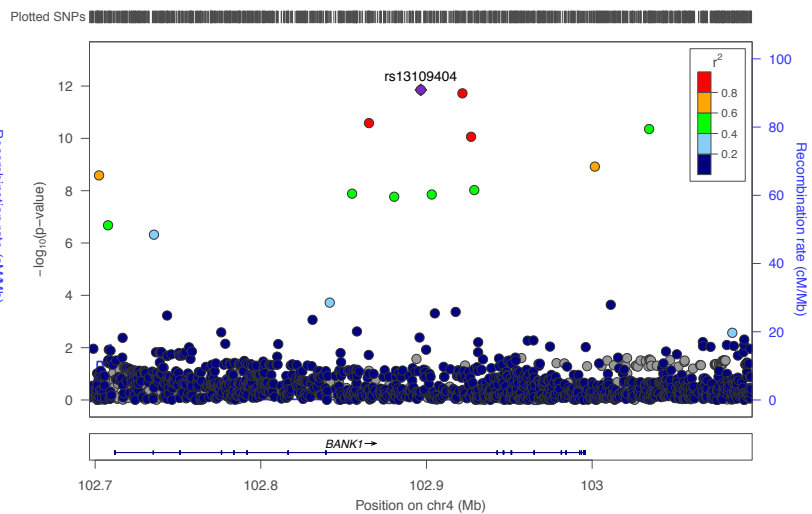

sleepduration\_7

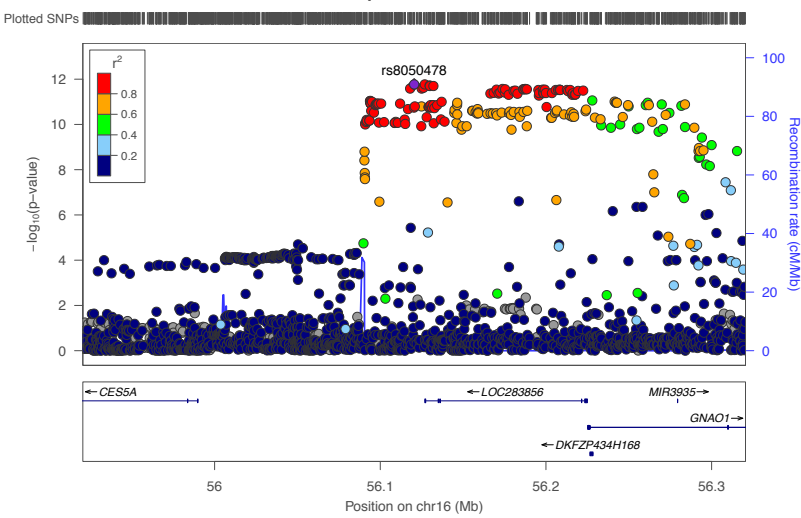

sleepduration\_8

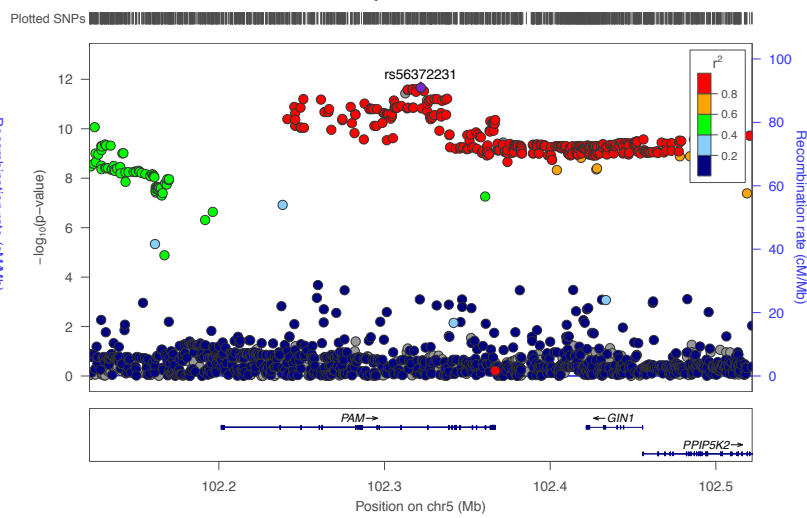

sleepduration\_9

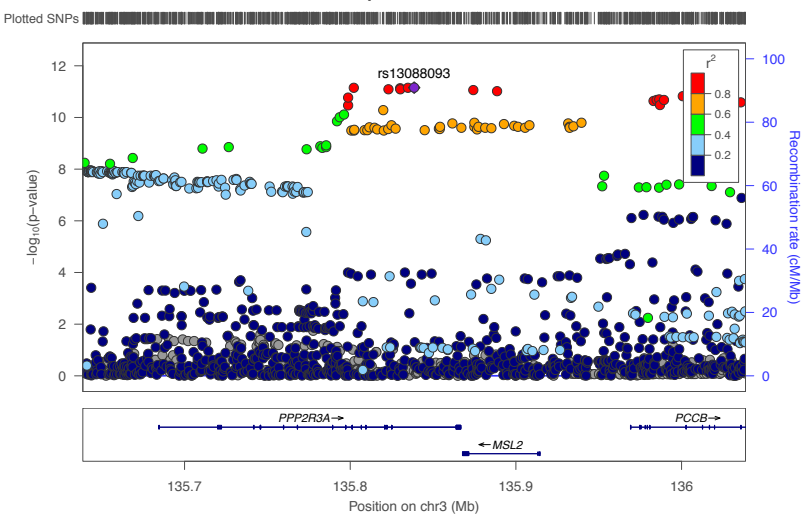

sleepduration\_10

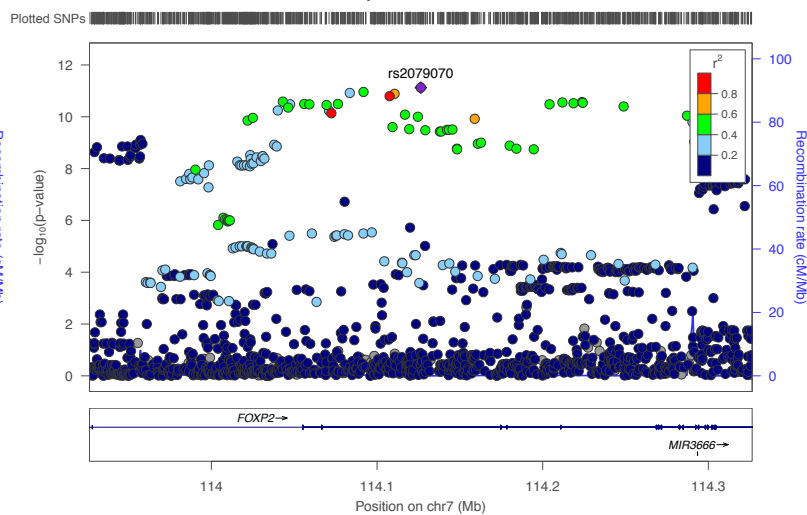

sleepduration\_11

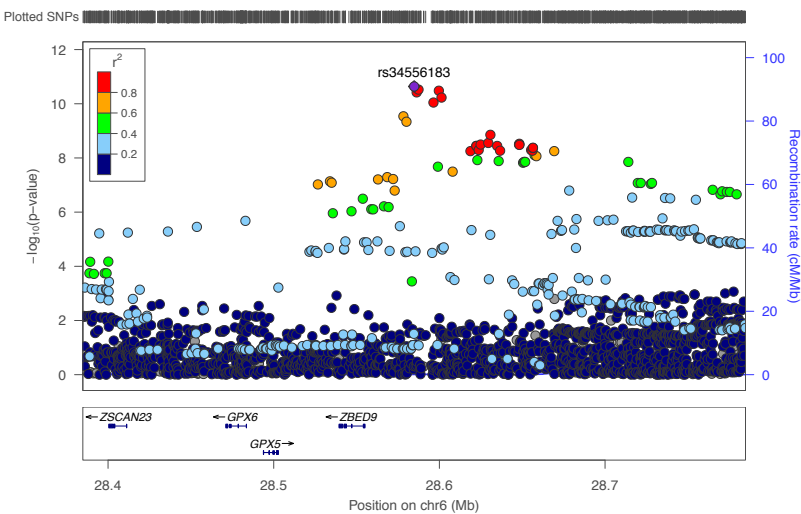

sleepduration\_12

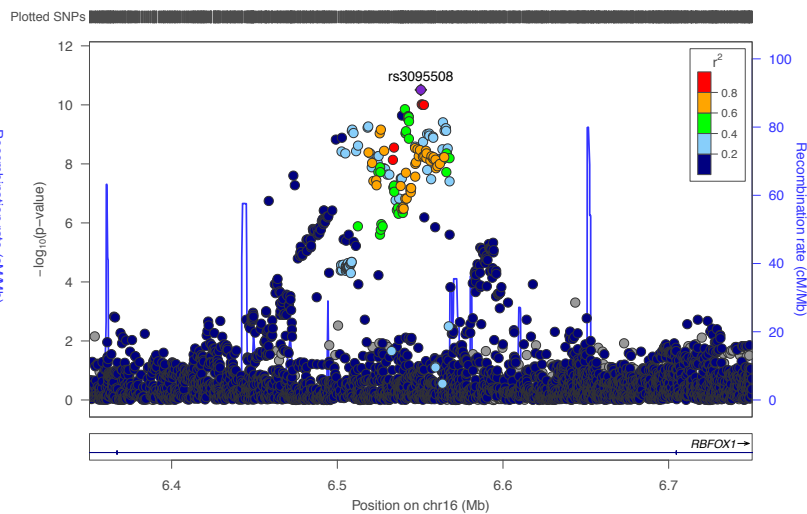

sleepduration\_13

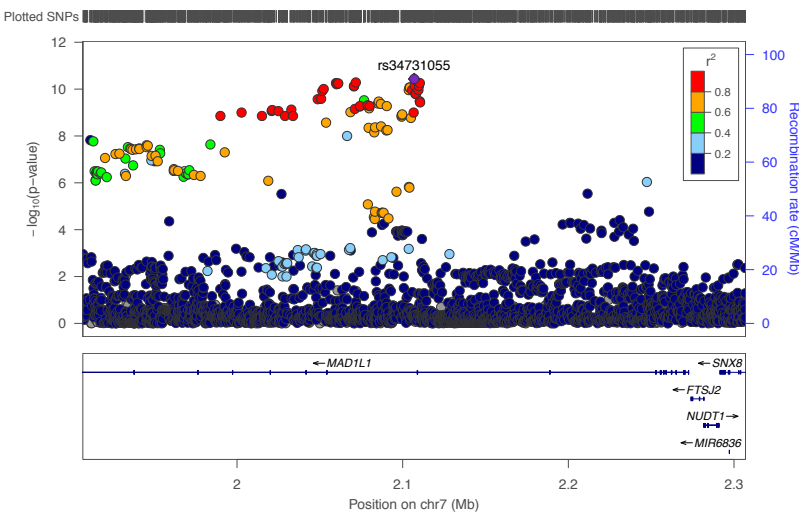

sleepduration\_14

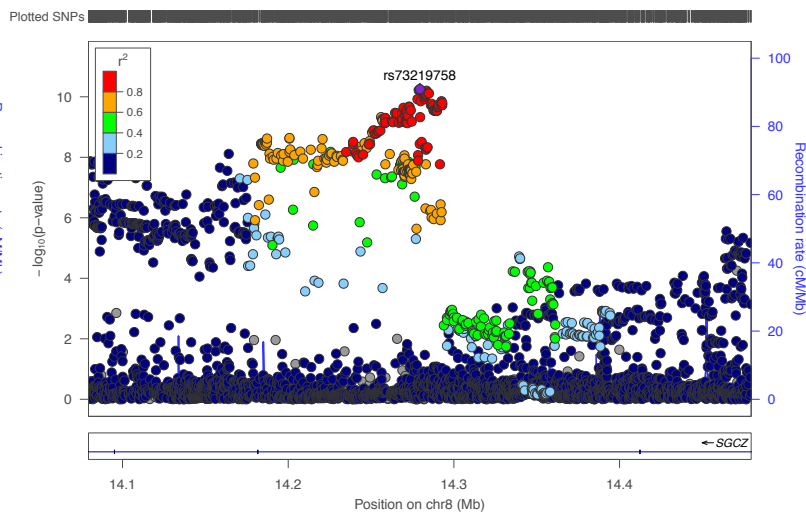

sleepduration\_15

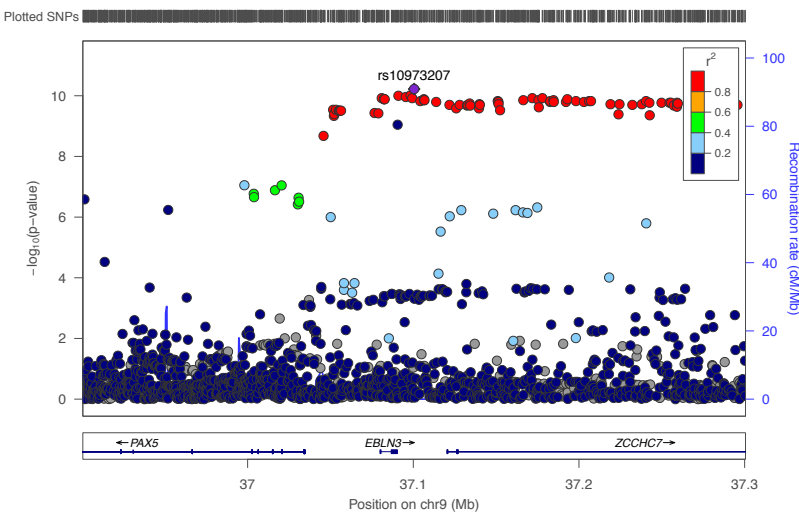

sleepduration\_16

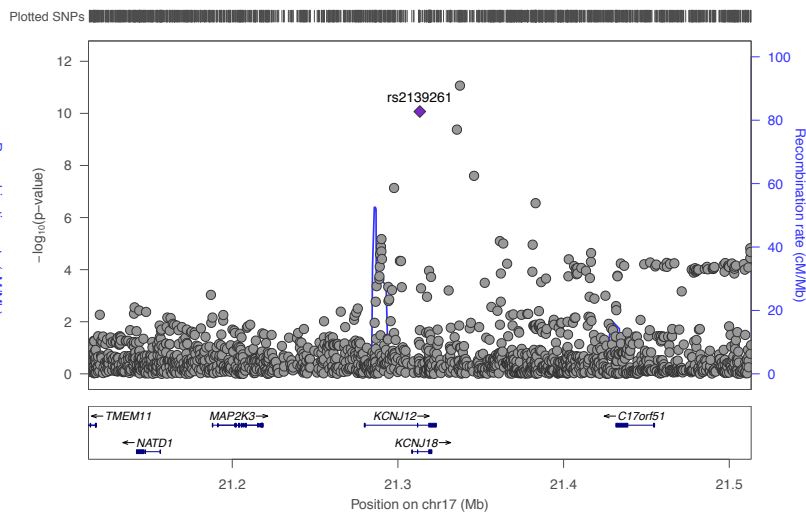

sleepduration\_17

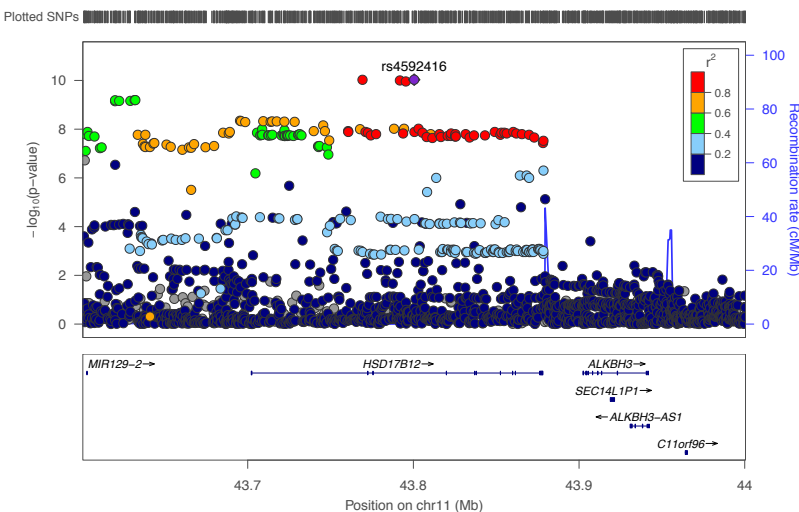

sleepduration\_18

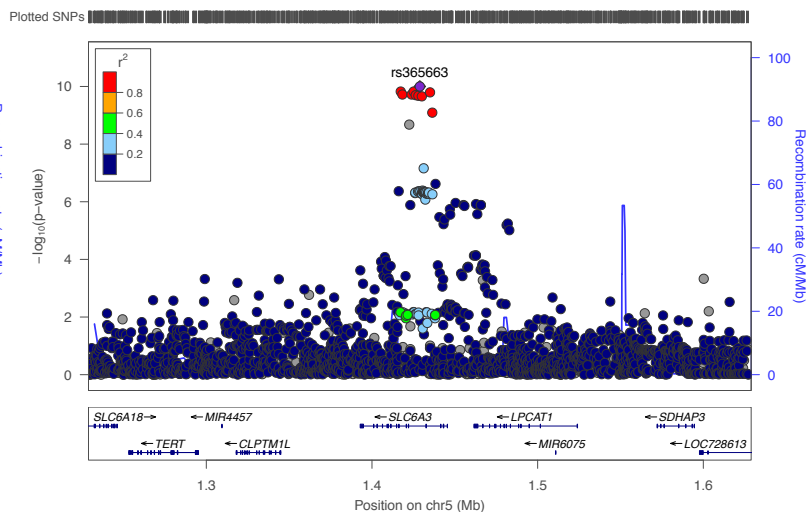

sleepduration\_19

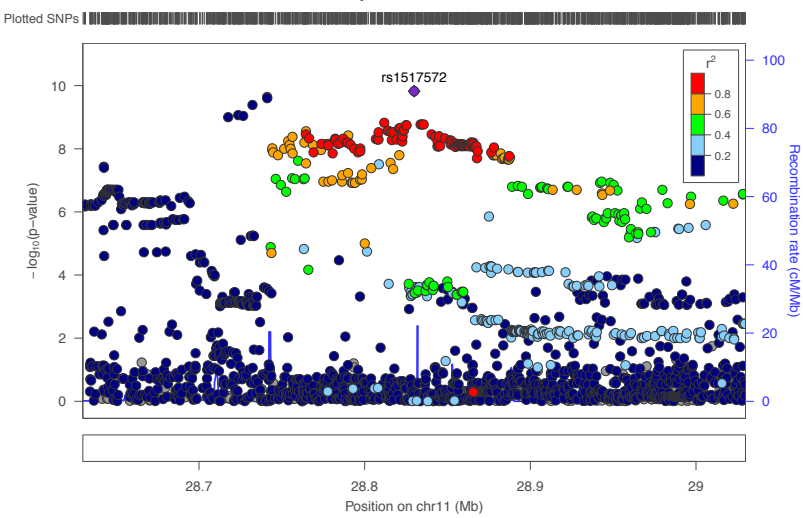

sleepduration\_20

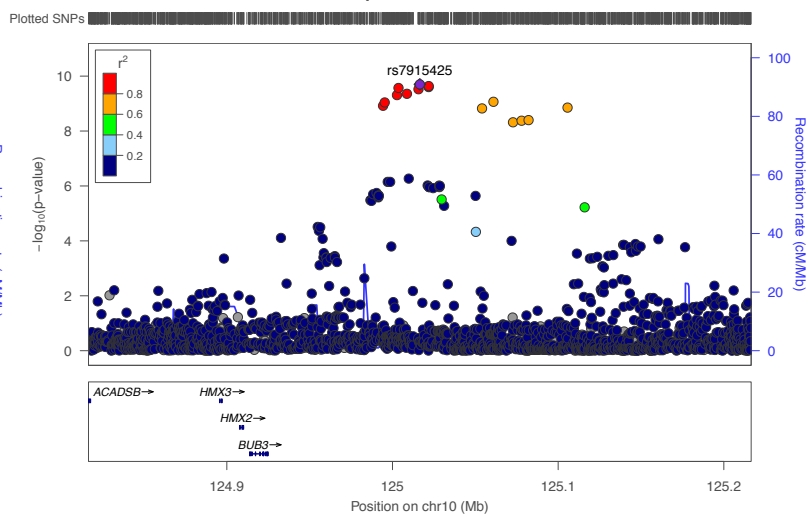

sleepduration\_21

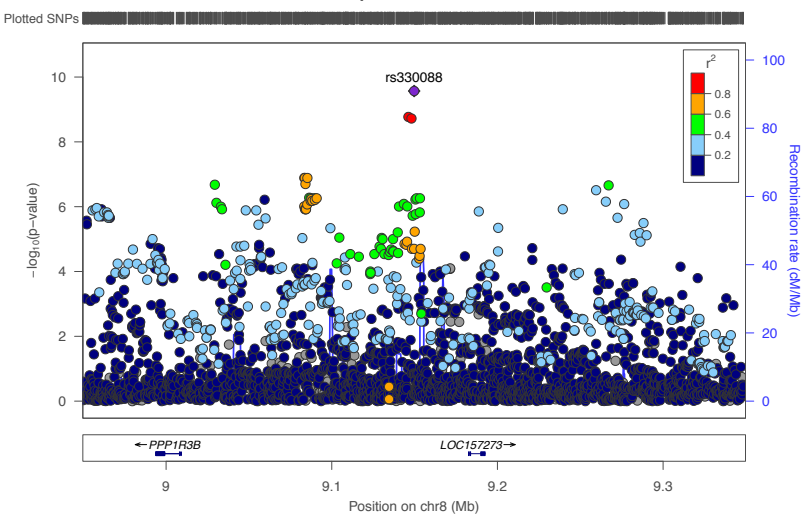

sleepduration\_22

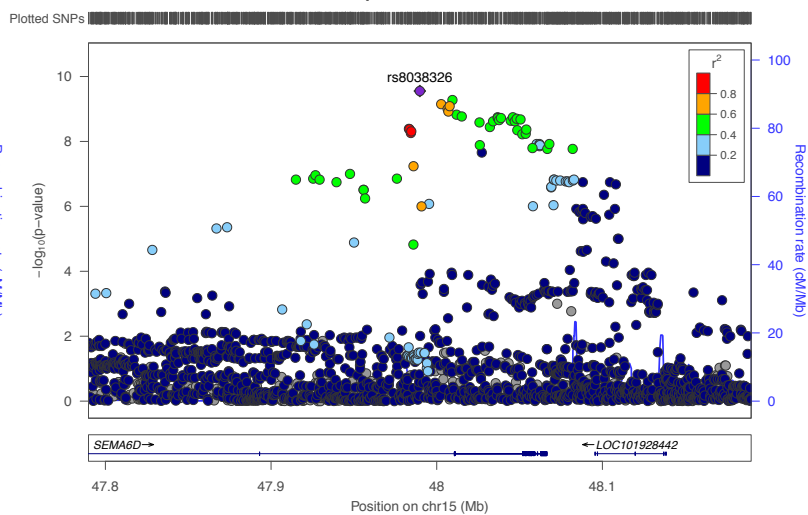

sleepduration\_23

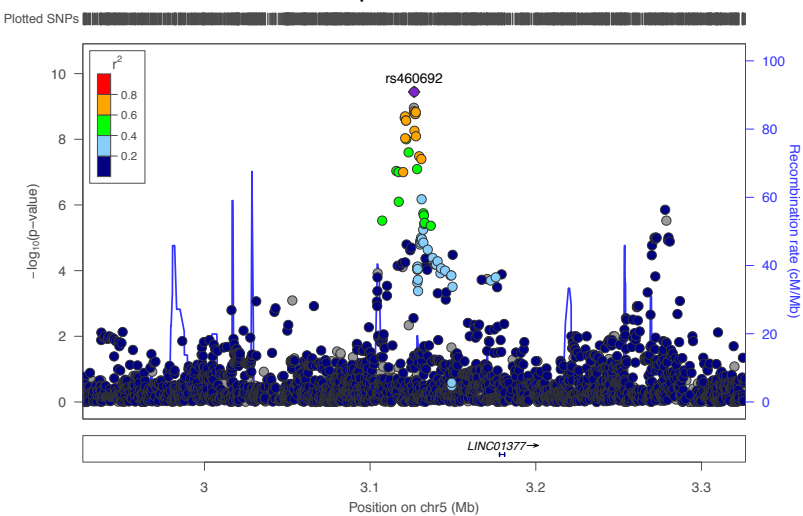

sleepduration\_24

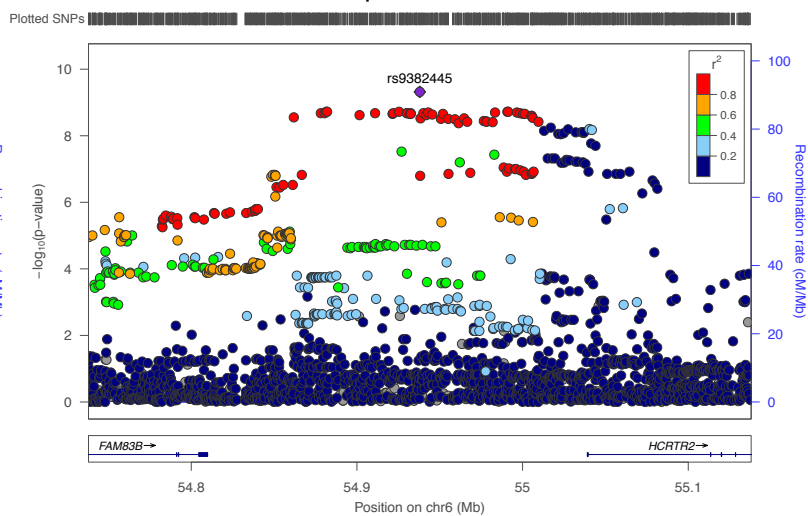



sleepduration\_25

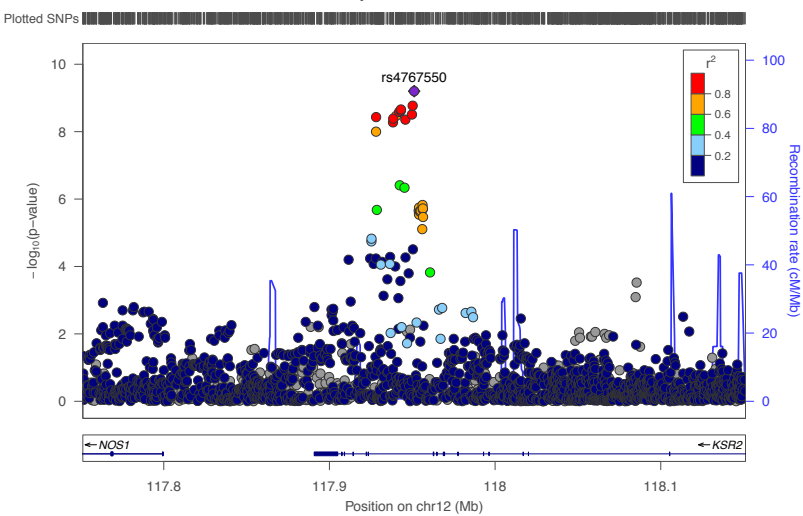

sleepduration\_26

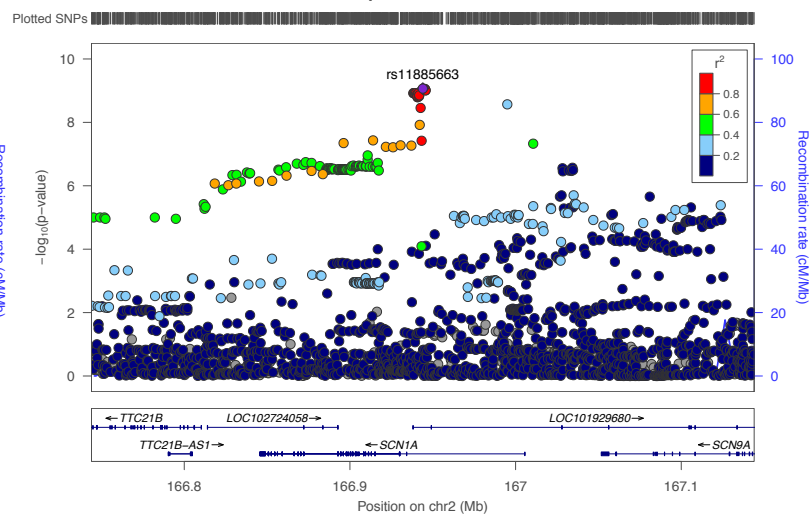

sleepduration\_27

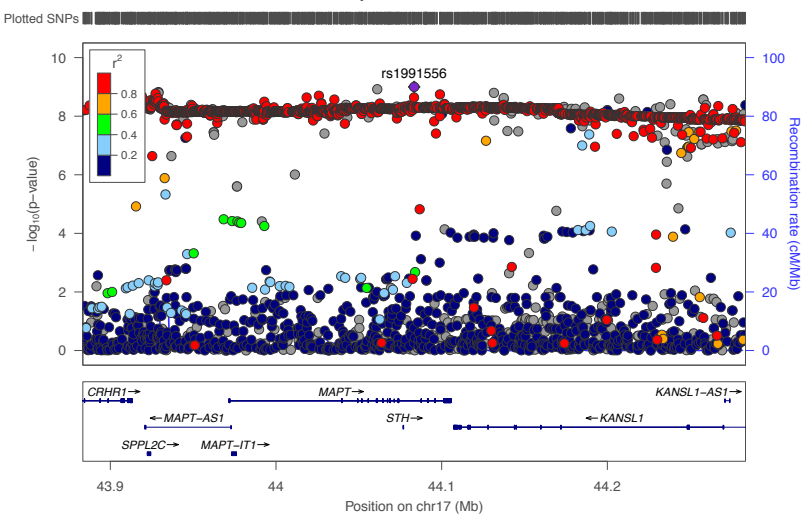

sleepduration\_28

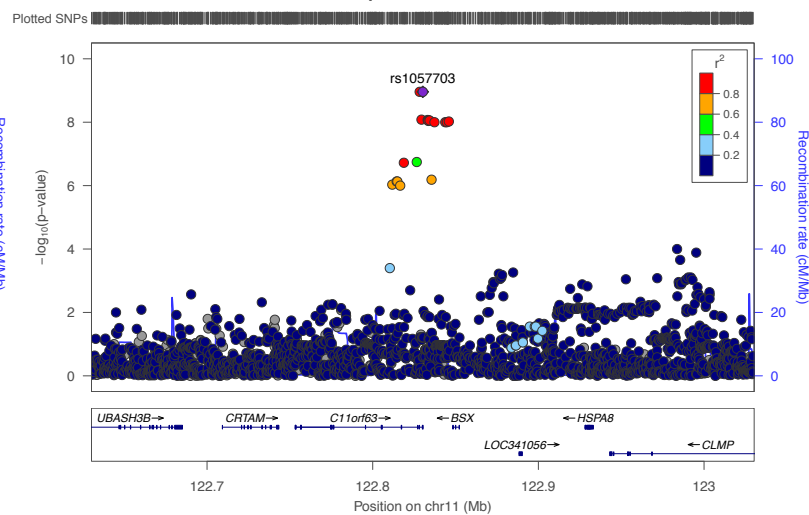

sleepduration\_29

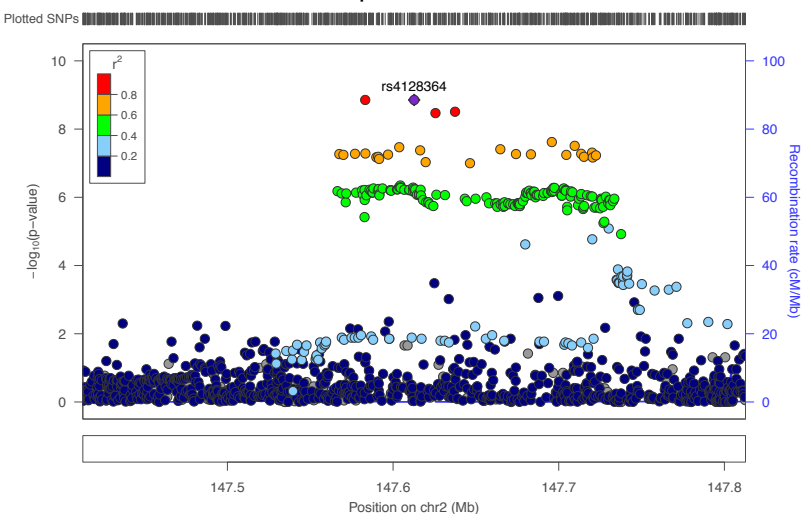

sleepduration\_30

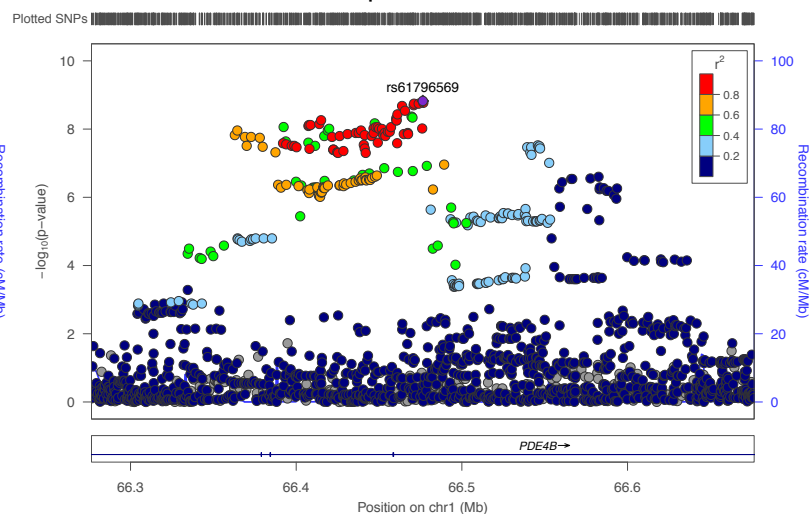

sleepduration\_31

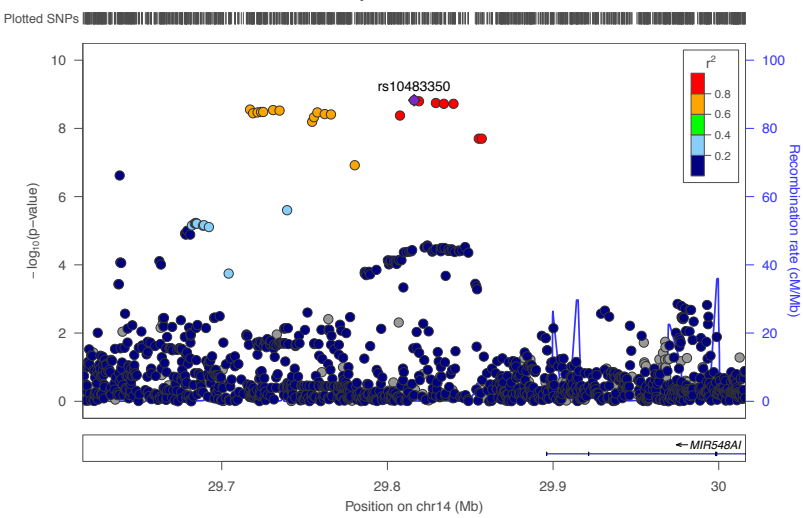

sleepduration\_32

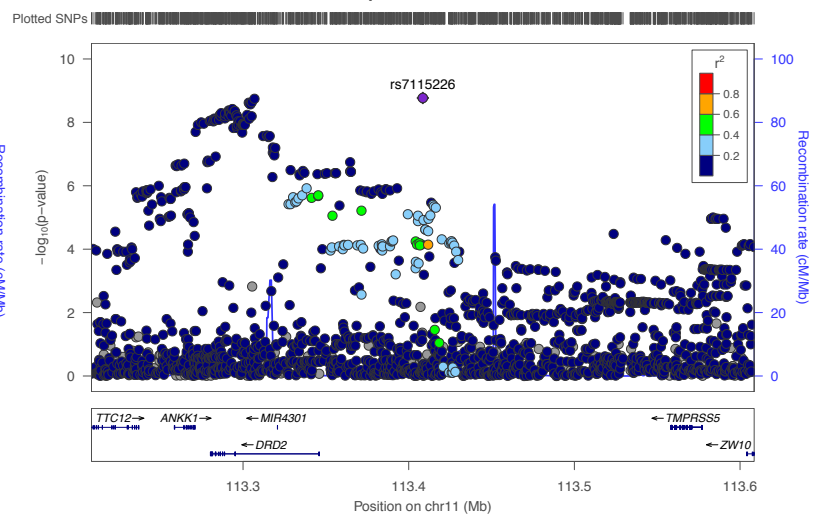

sleepduration\_33

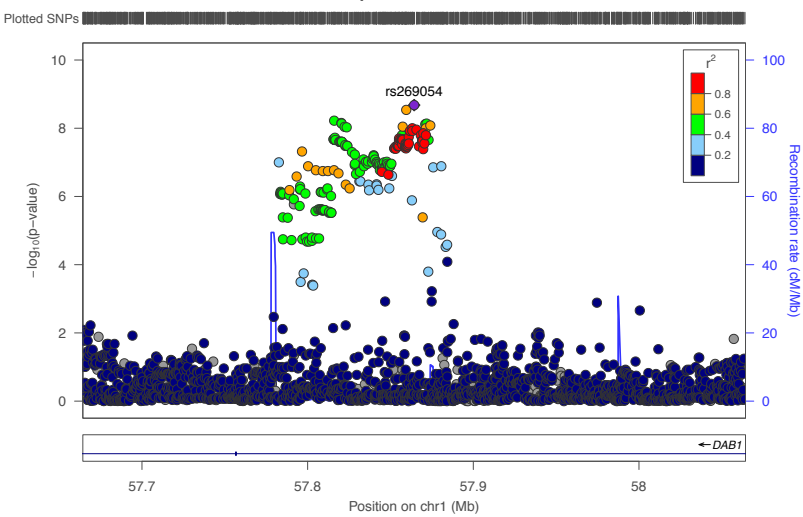

sleepduration\_34

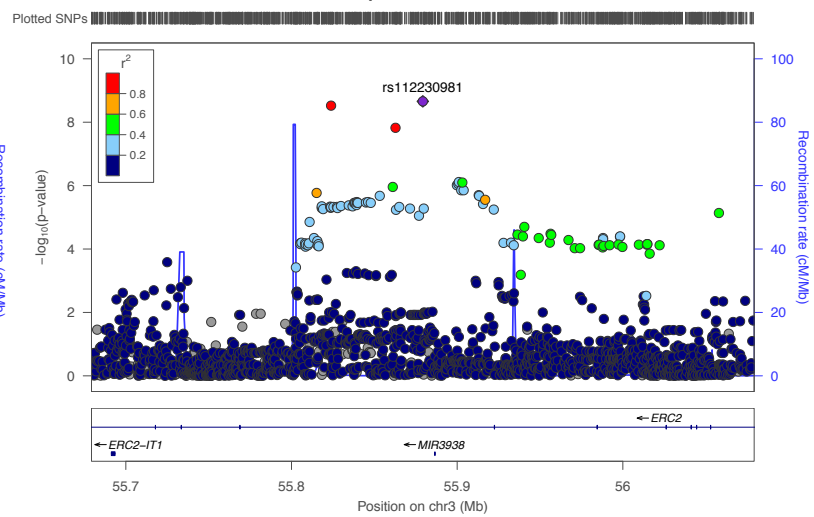

sleepduration\_35

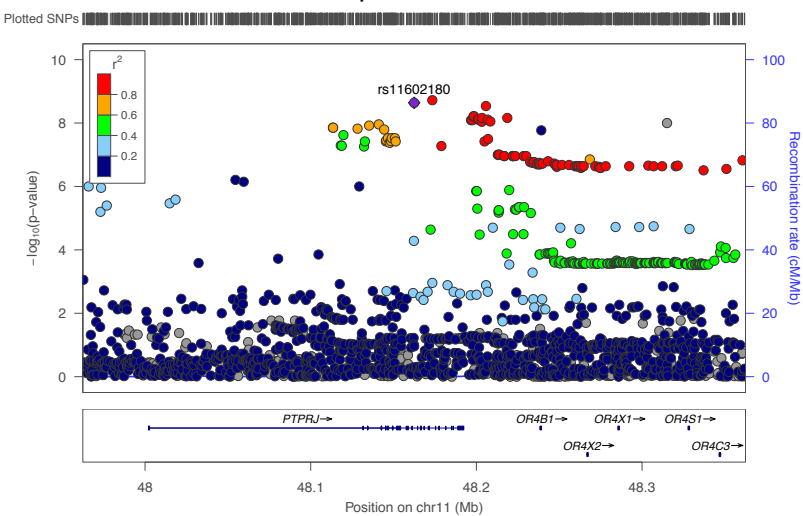

sleepduration\_36

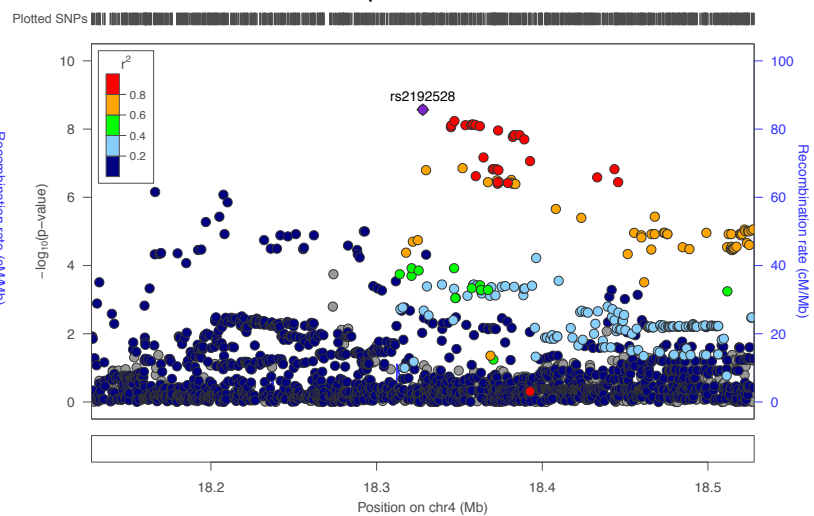

sleepduration\_37

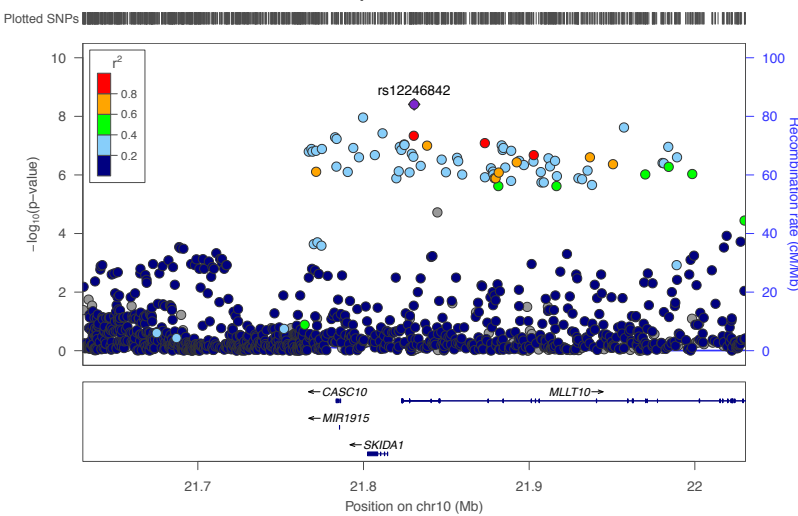

sleepduration\_38

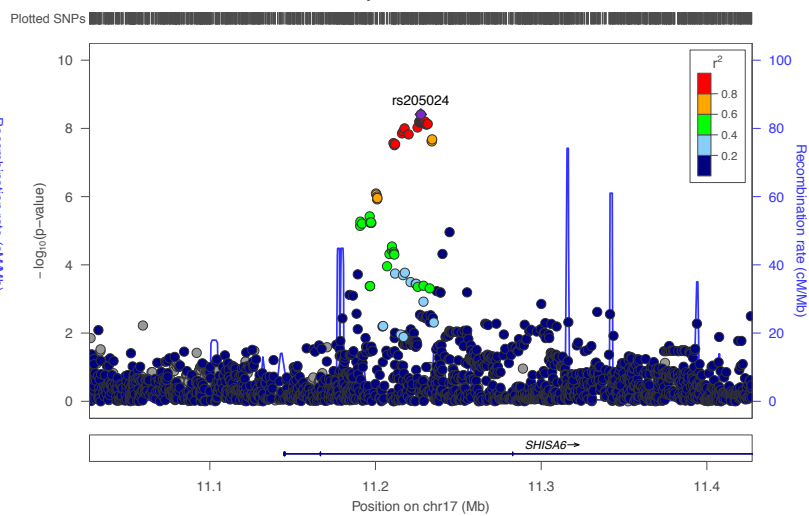

sleepduration\_39

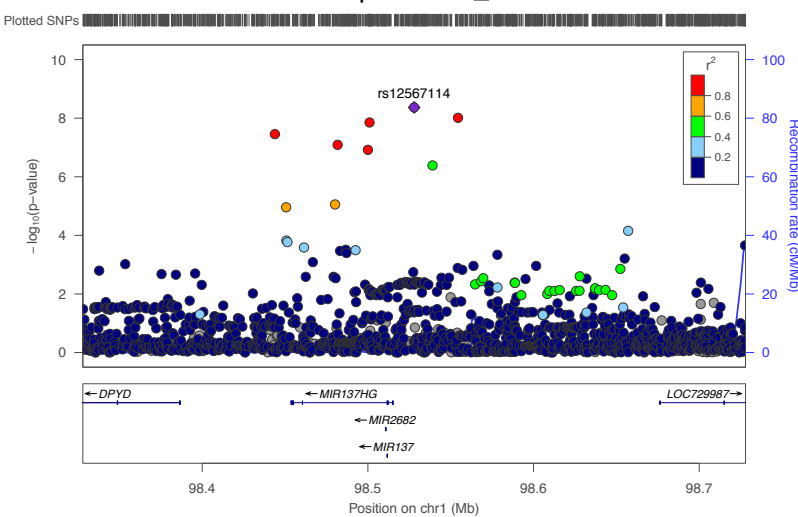

sleepduration\_40

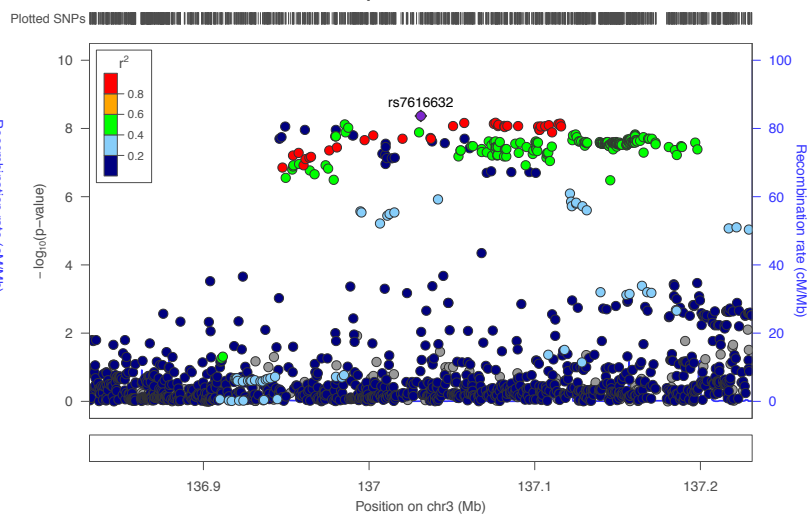

sleepduration\_41

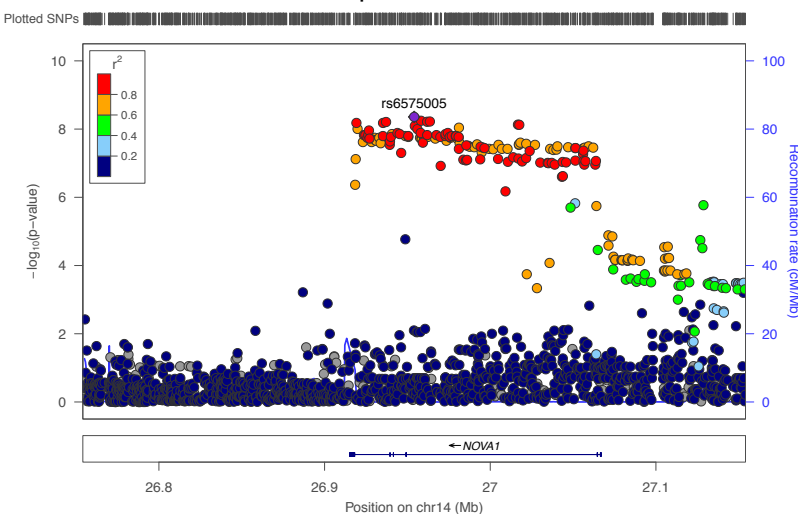

sleepduration\_42

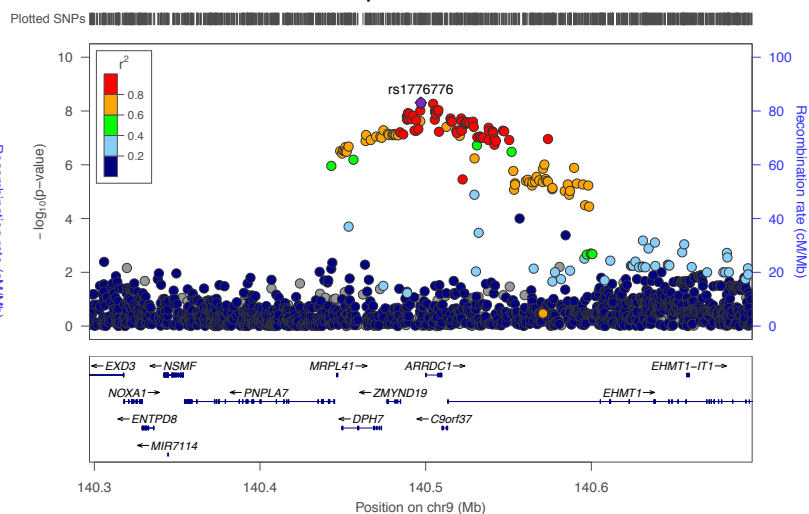

sleepduration\_43

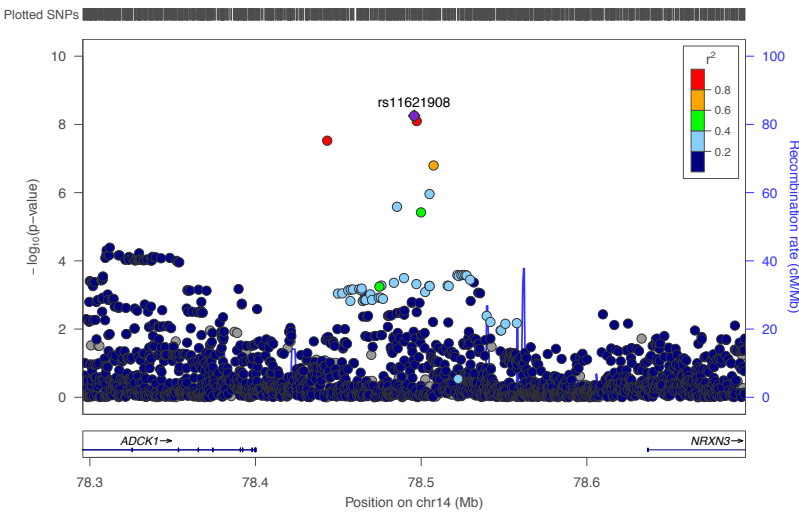

sleepduration\_44

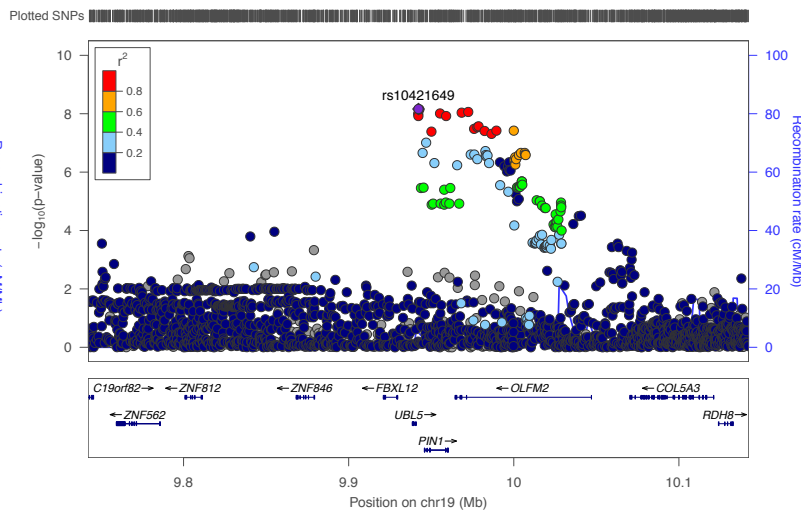

sleepduration\_45

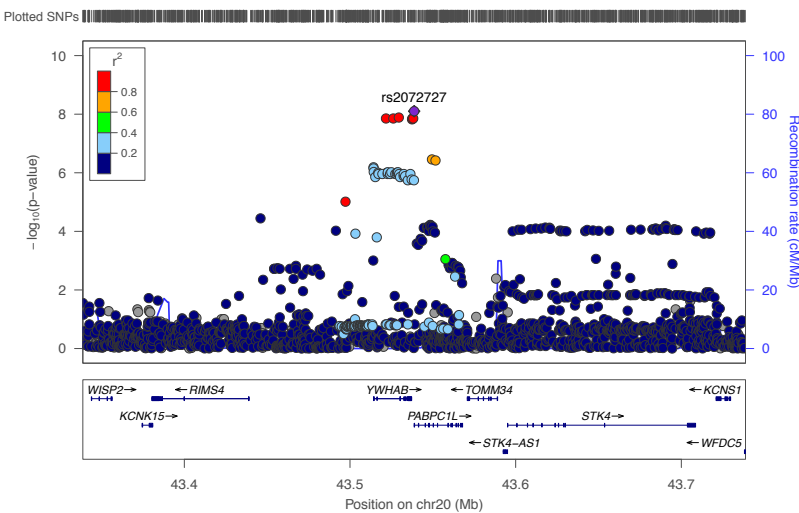

sleepduration\_46

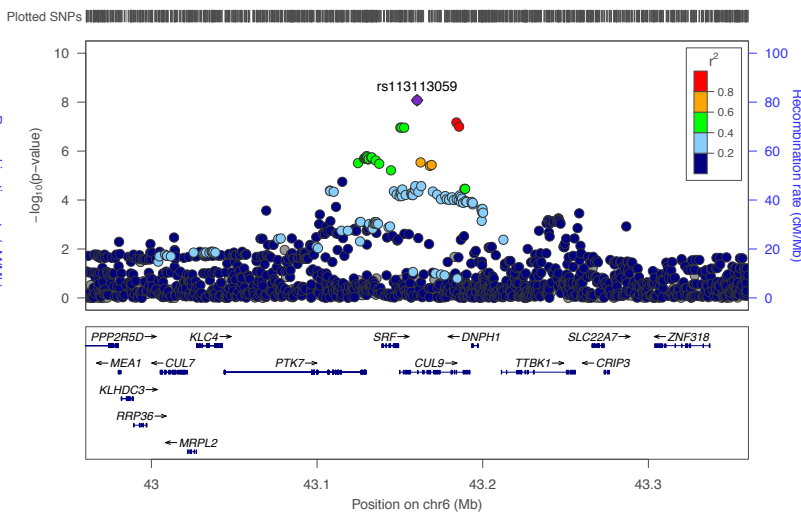

sleepduration\_47

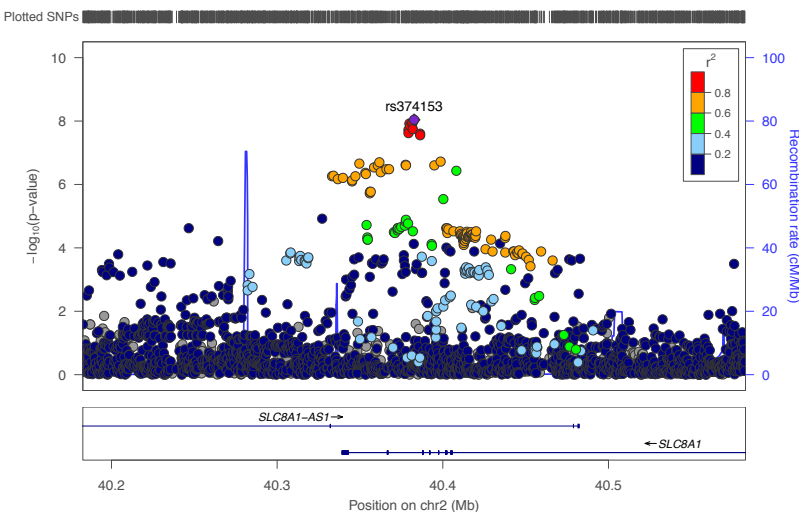

sleepduration\_48

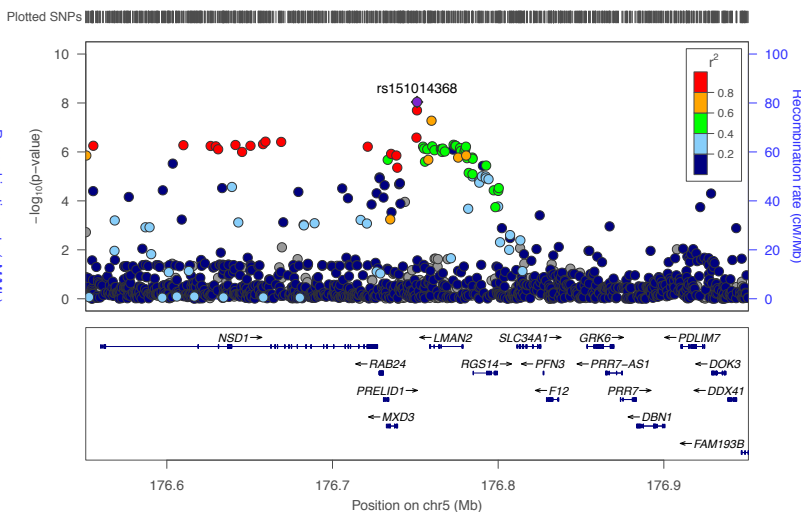



sleepduration\_49

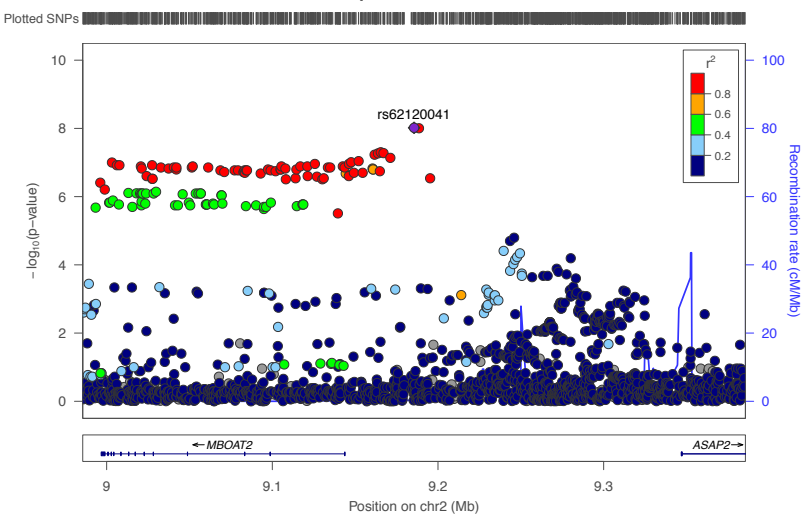

sleepduration\_50

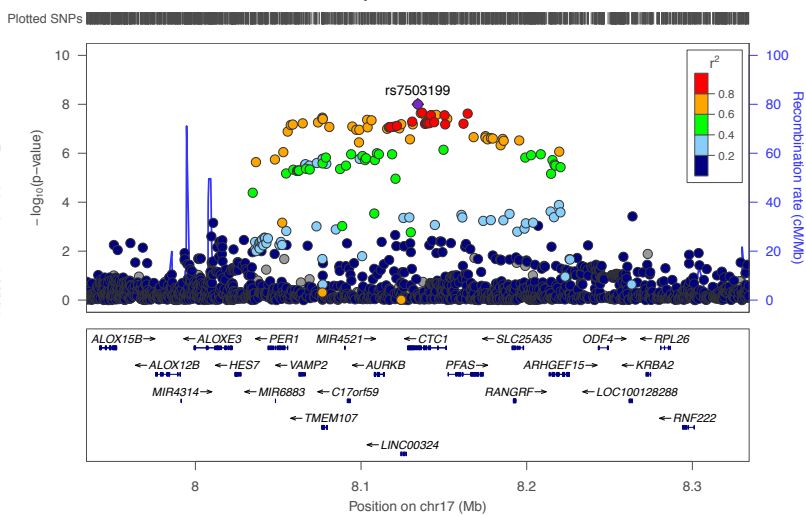

sleepduration\_51

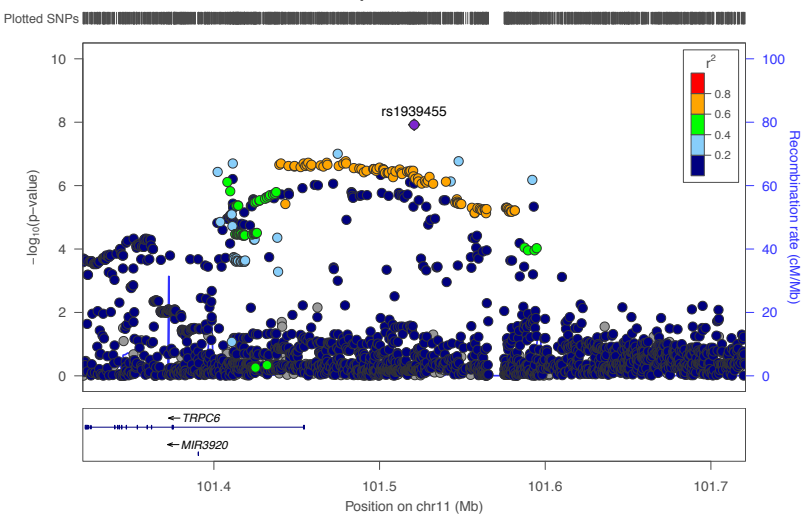

sleepduration\_52

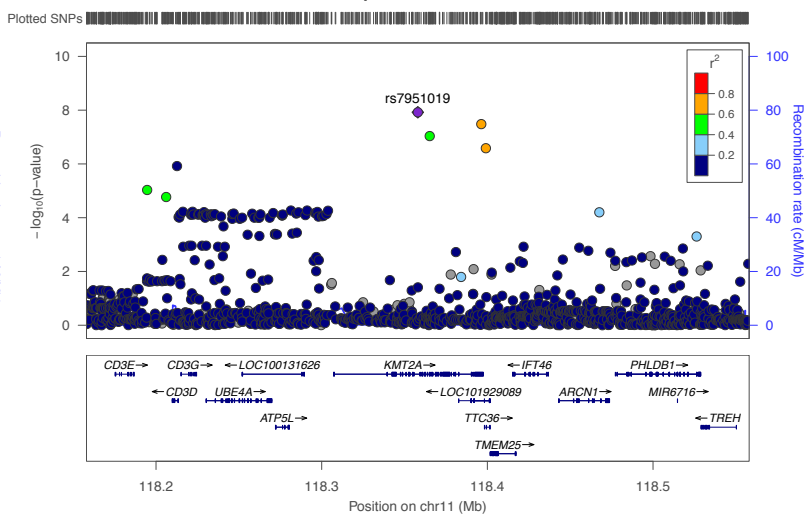

sleepduration\_53

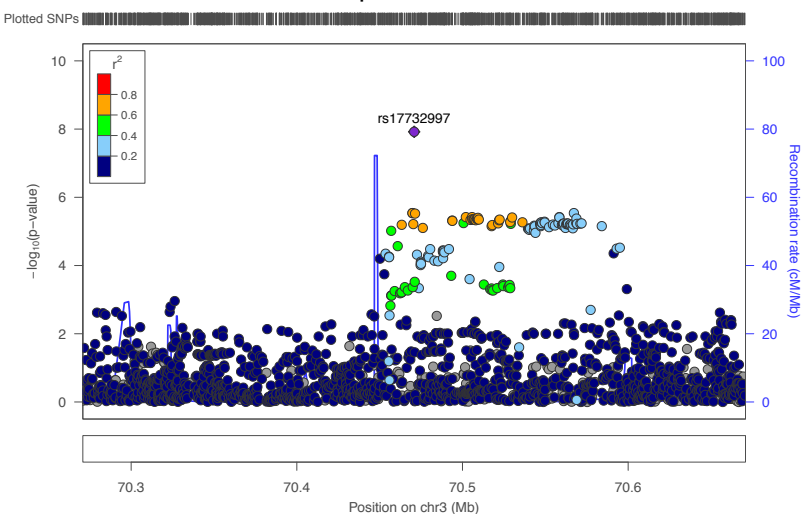

sleepduration\_54

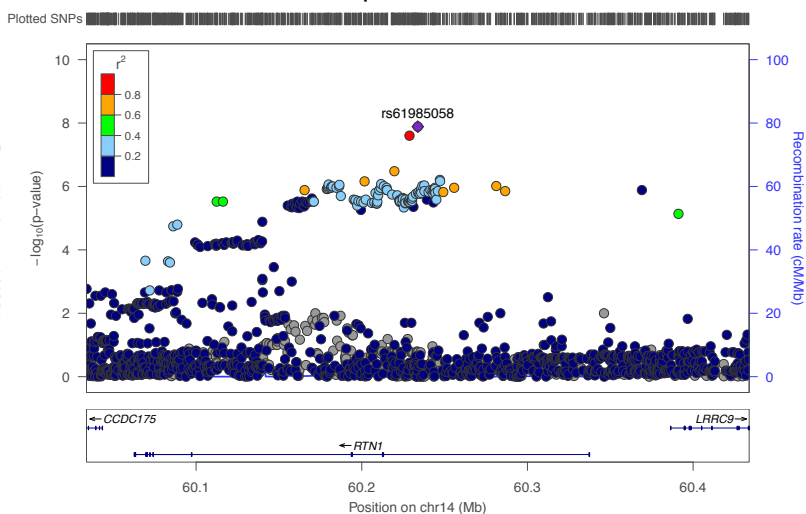

sleepduration\_55

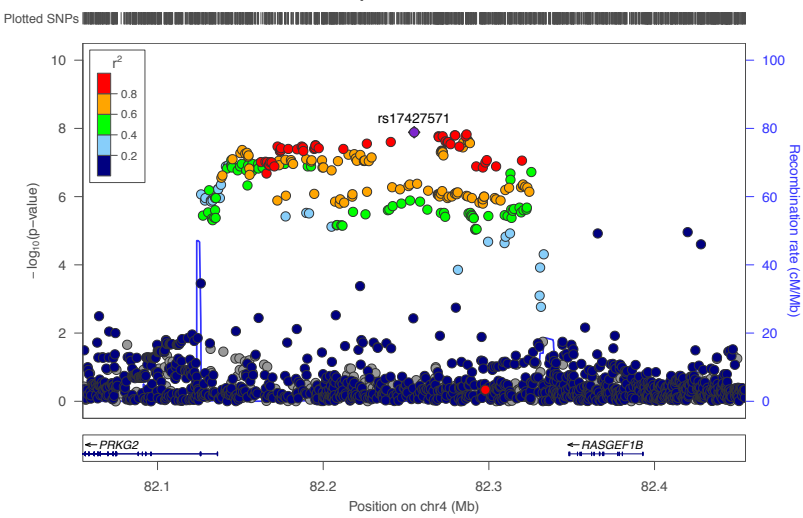

sleepduration\_56

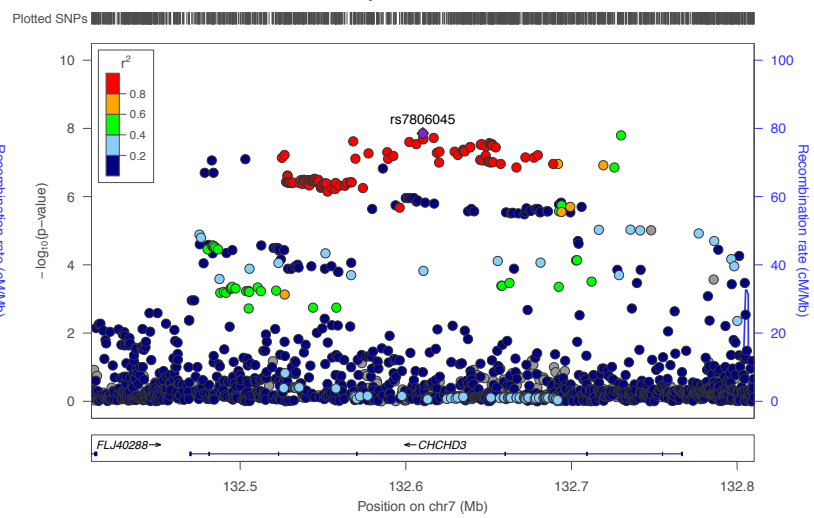

sleepduration\_57

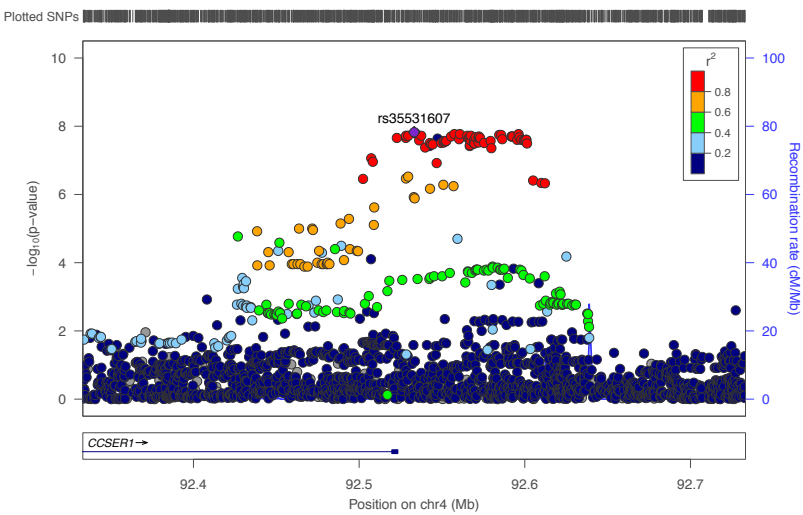

sleepduration\_58

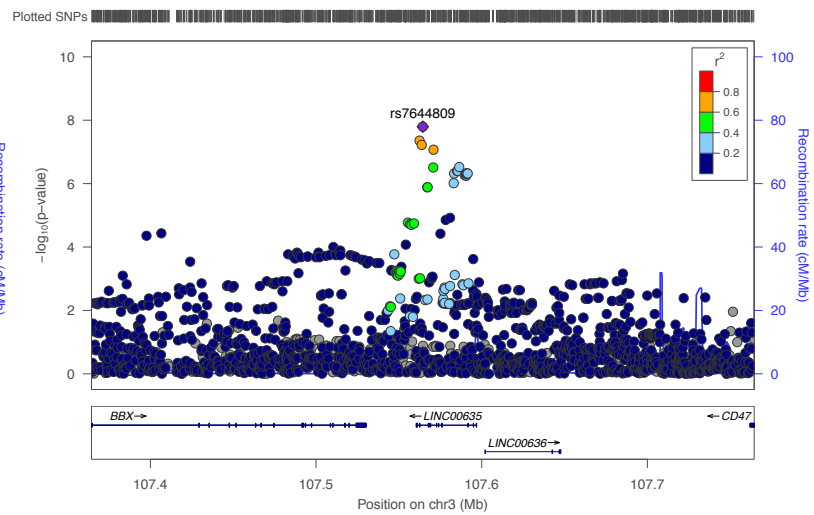

sleepduration\_59

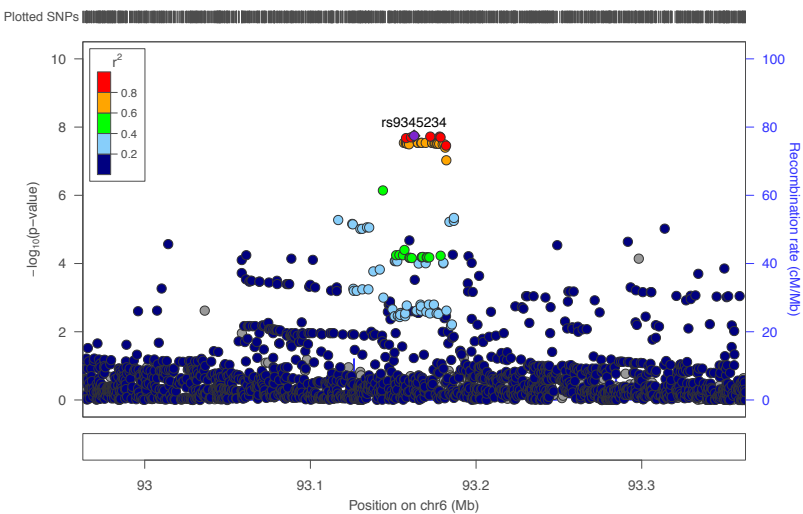

sleepduration\_60

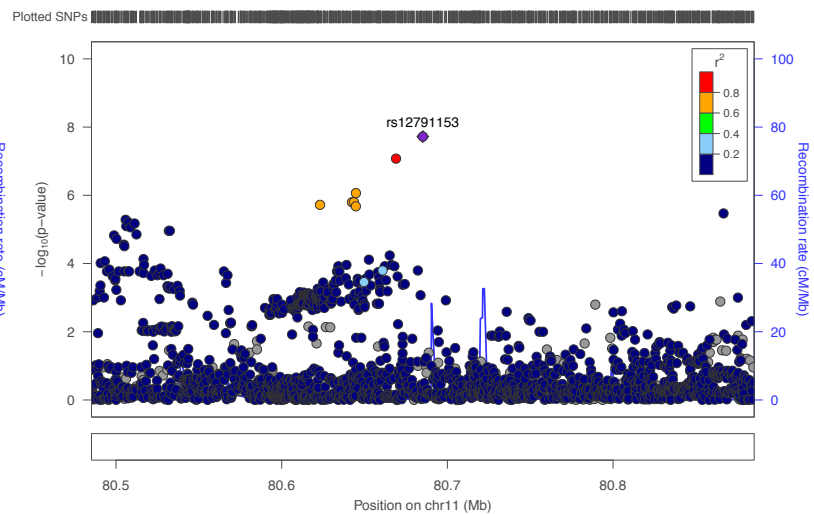

sleepduration\_61

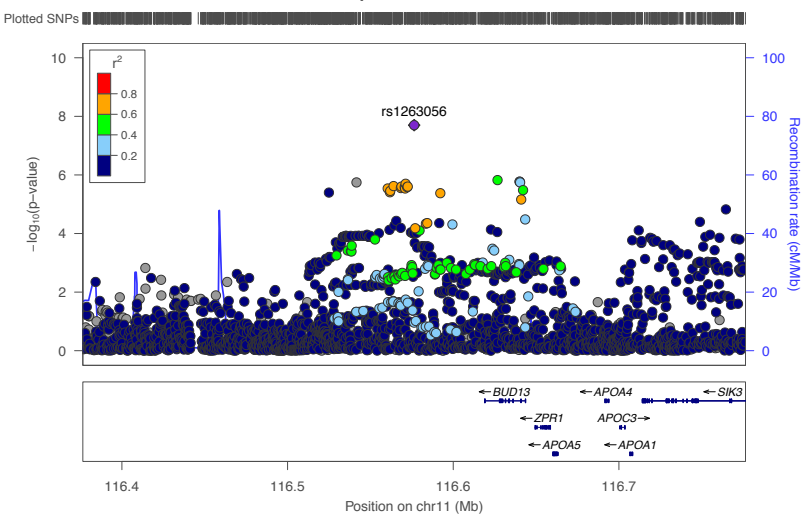

sleepduration\_62

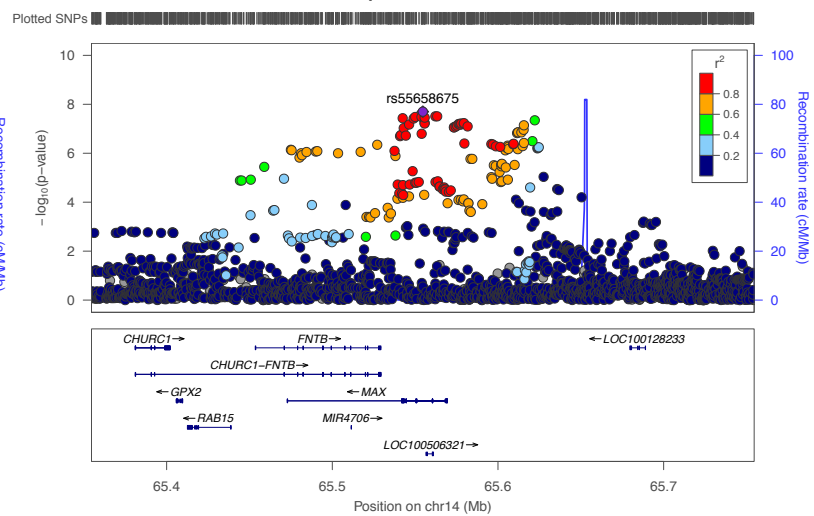

sleepduration\_63

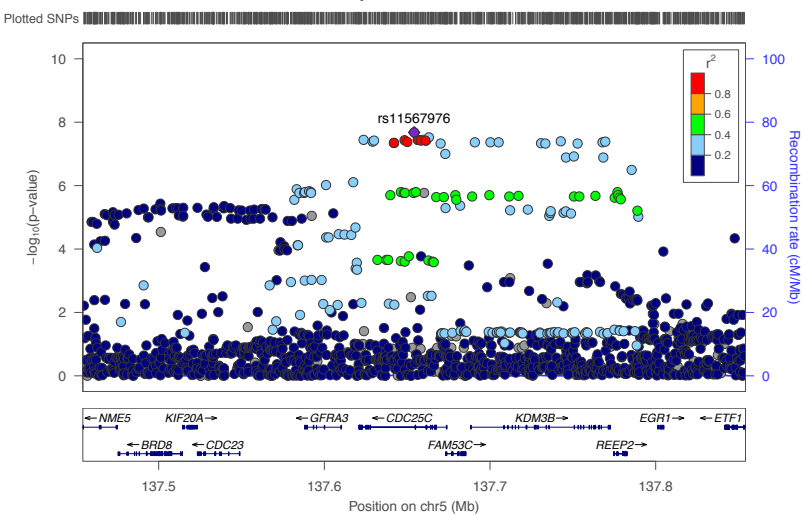

sleepduration\_64

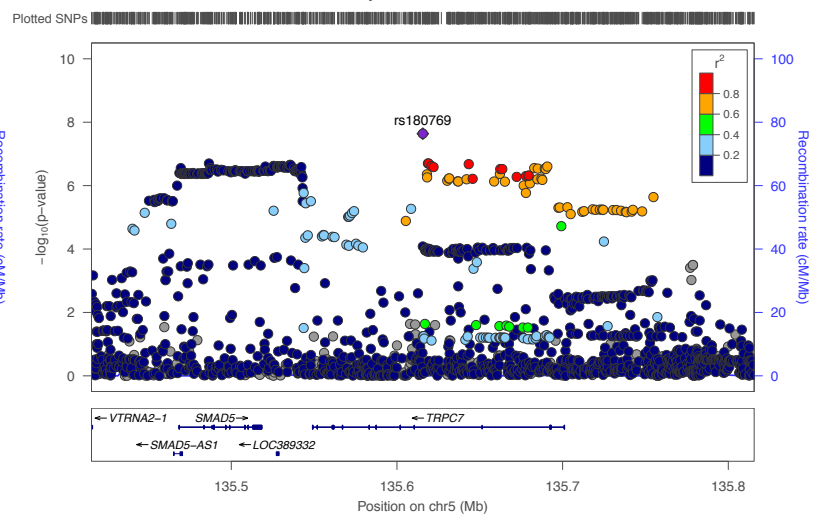

sleepduration\_65

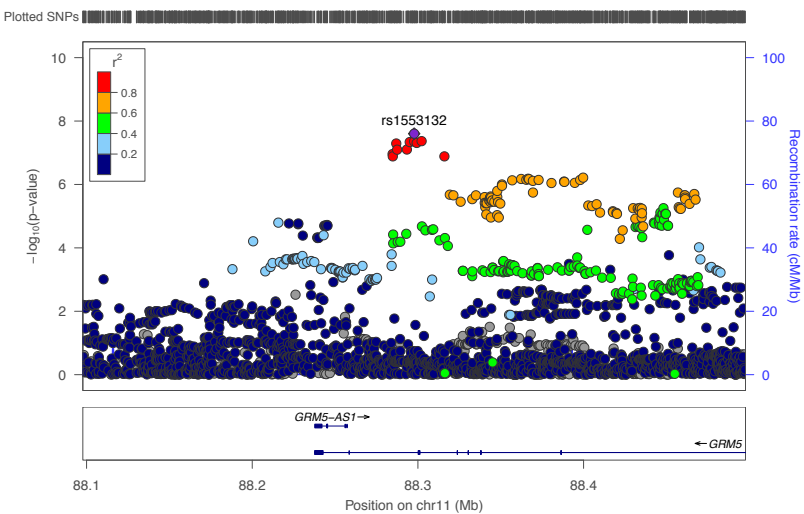

sleepduration\_66

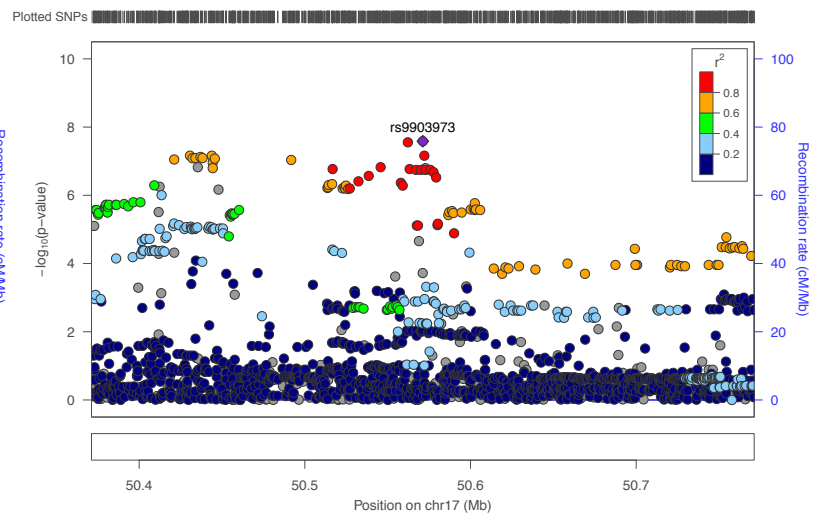

sleepduration\_67

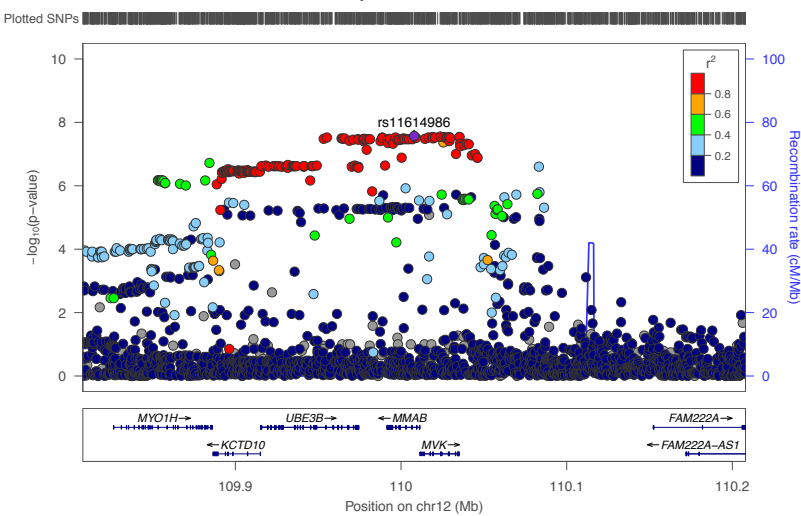

sleepduration\_68

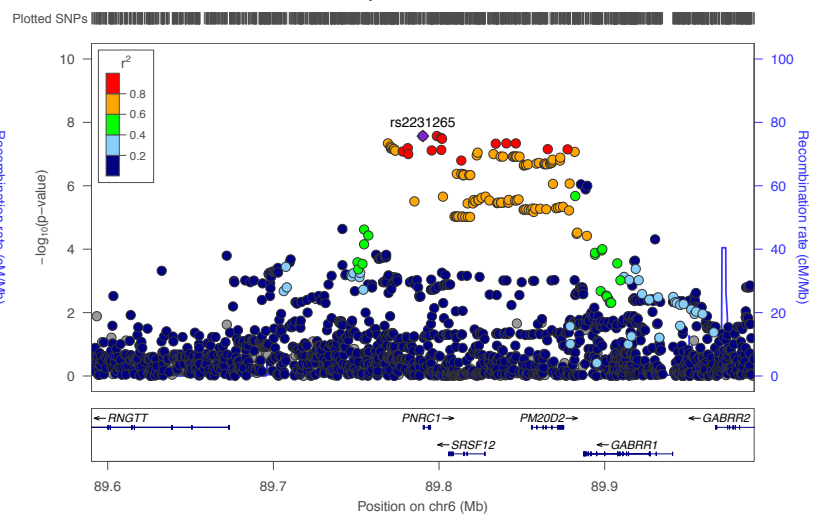

sleepduration\_69

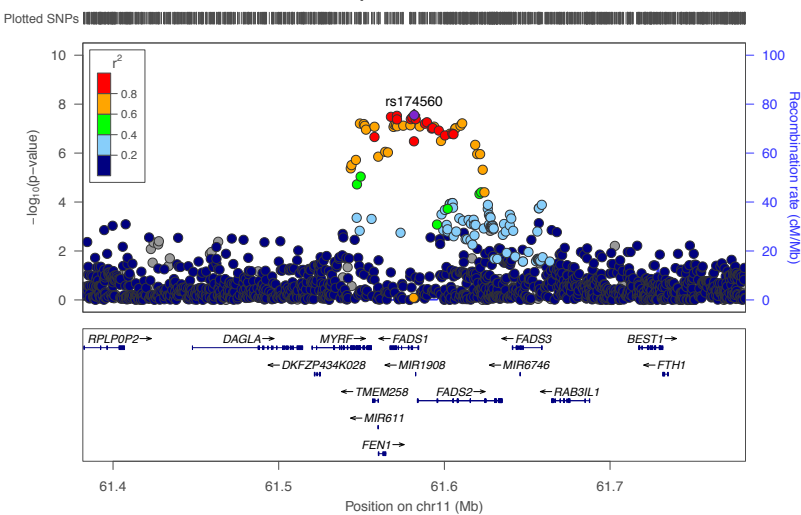

sleepduration\_70

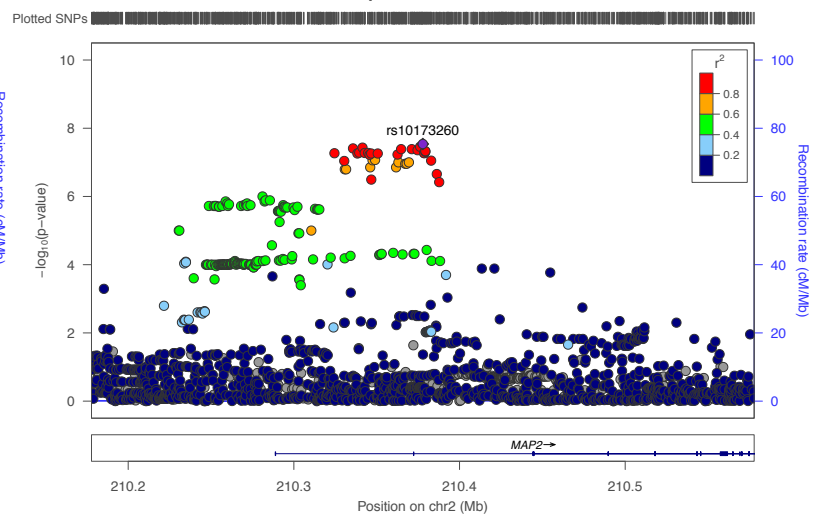

sleepduration\_71

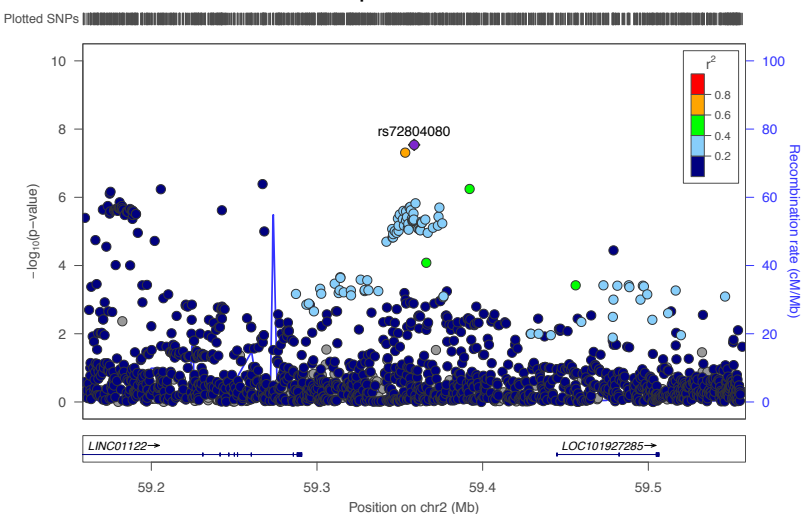

sleepduration\_72

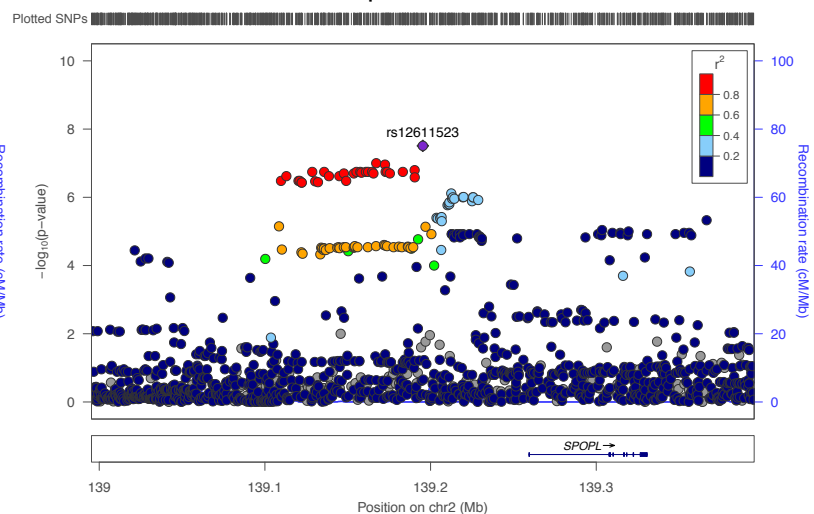



sleepduration\_73

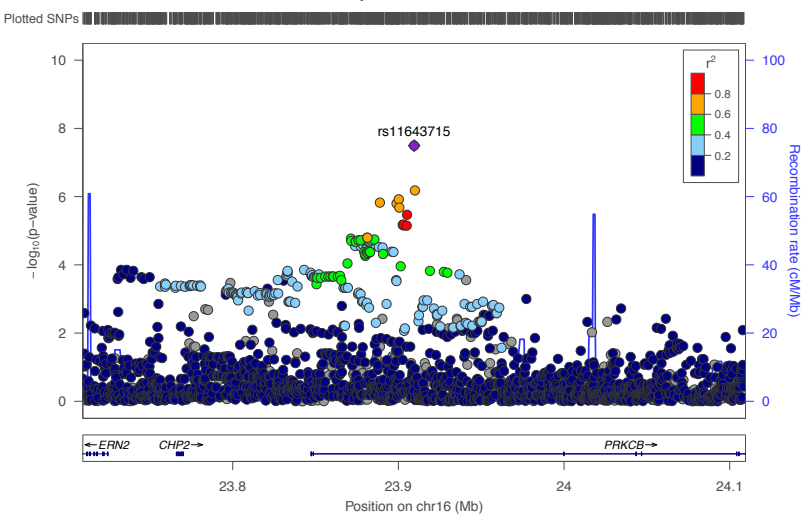

sleepduration\_74

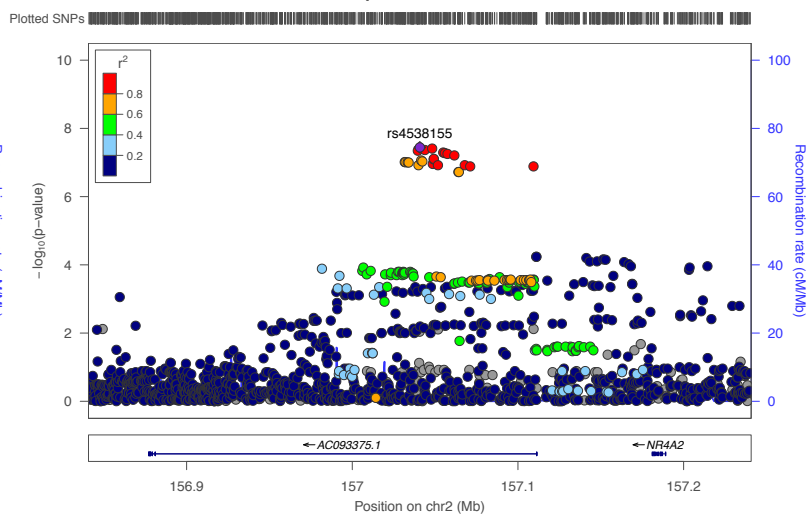

sleepduration\_75

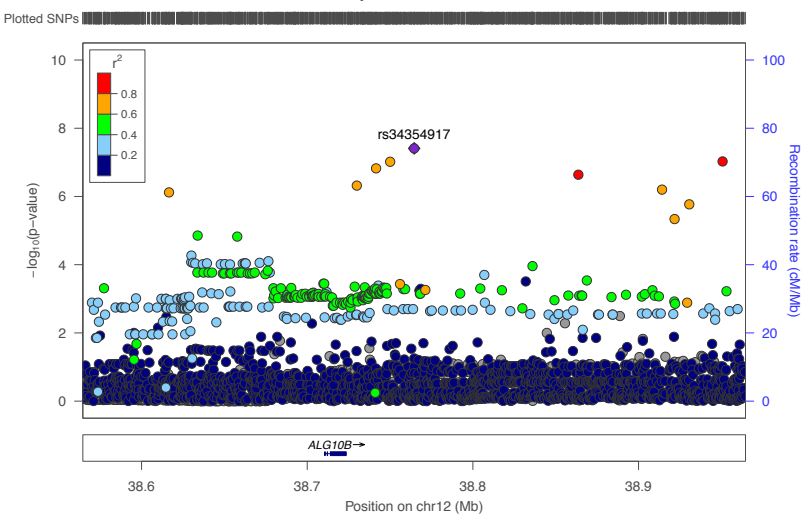

sleepduration\_76

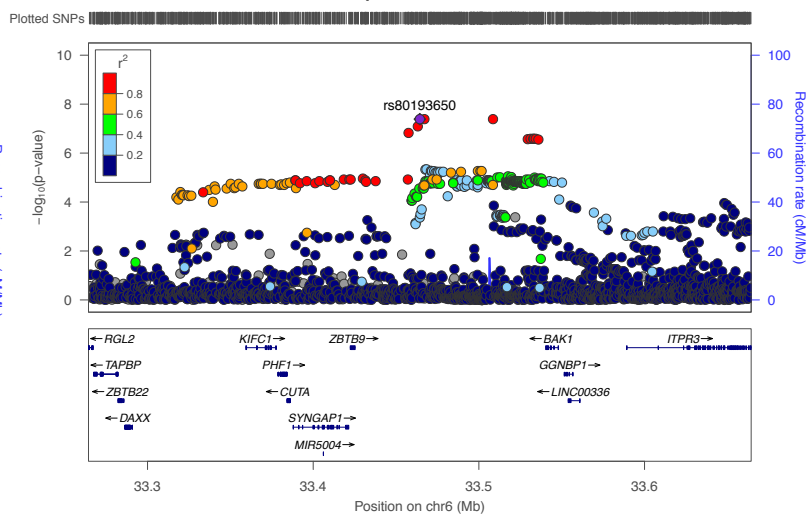

sleepduration\_77

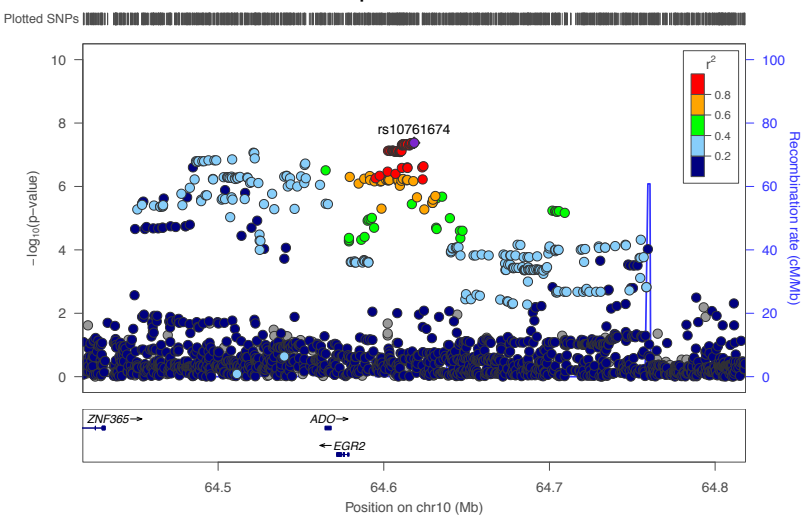

sleepduration\_78

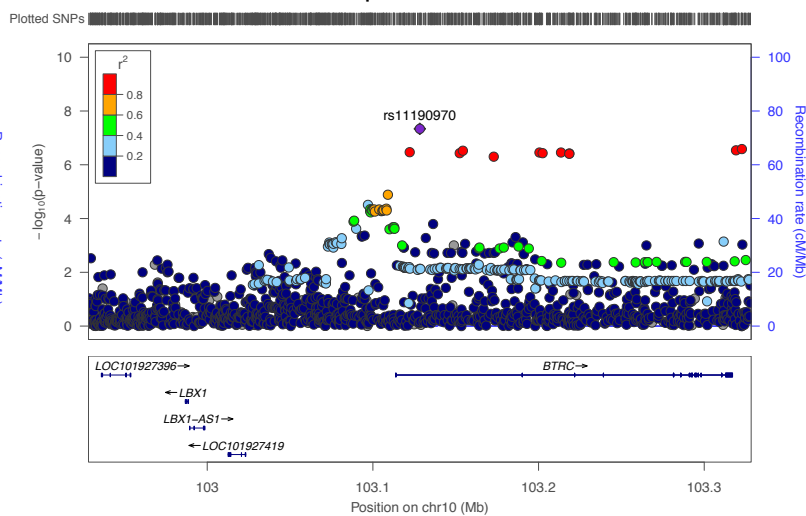

sleep\_m2\_1

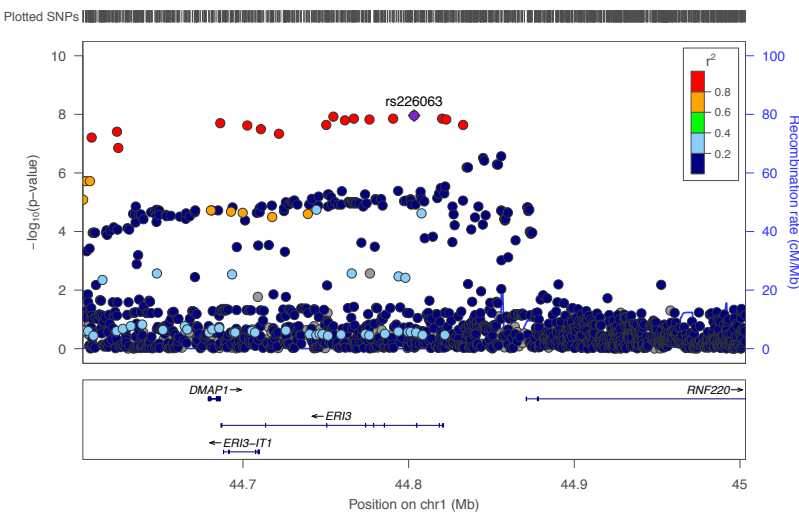

sleep\_m2\_2

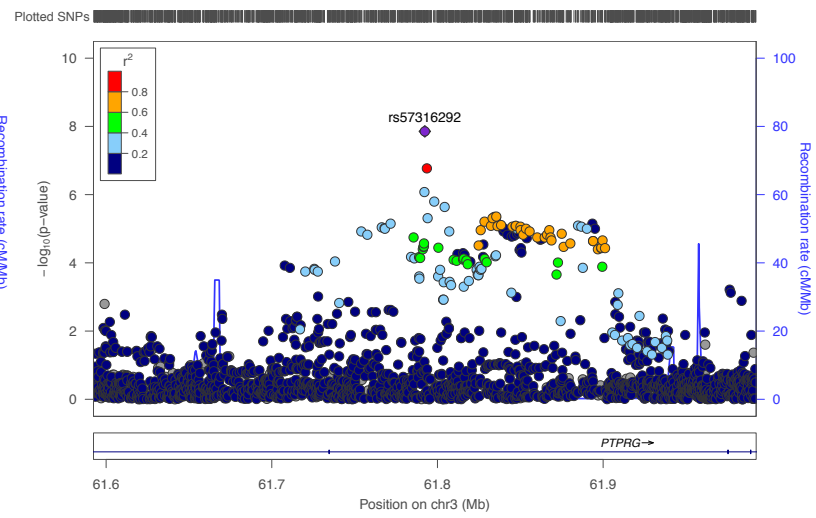

sleep\_m2\_3

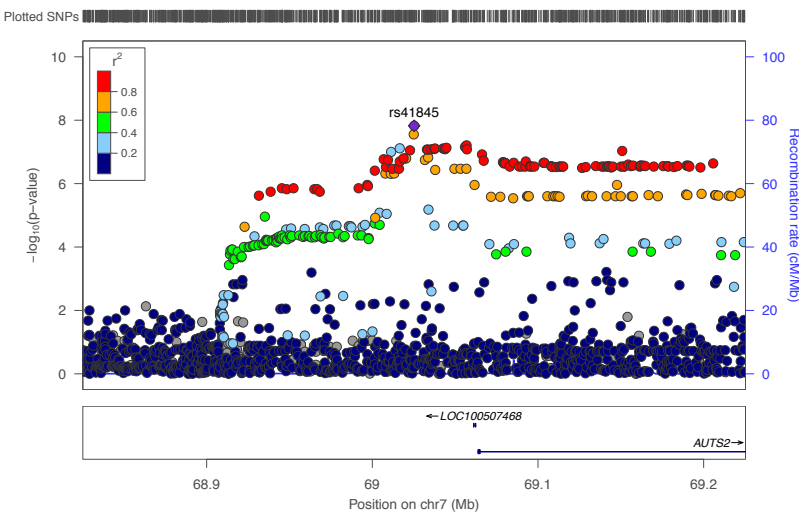

sleep\_m2\_4

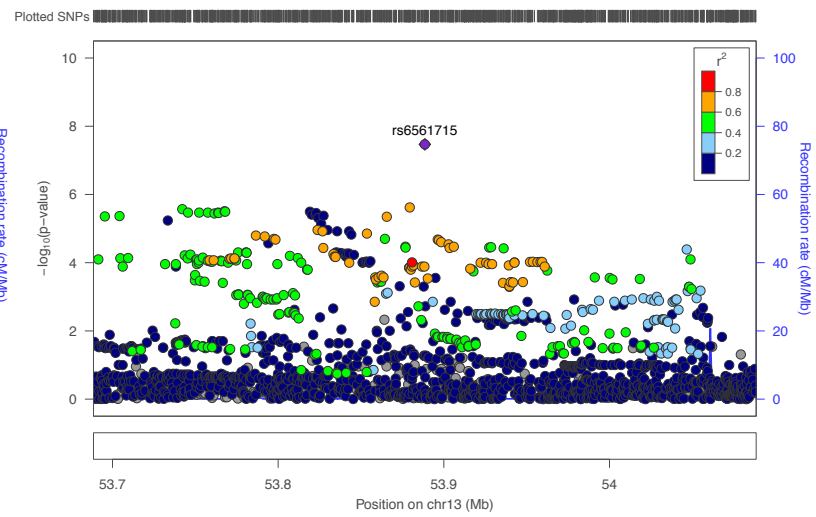

sleep\_m2\_5

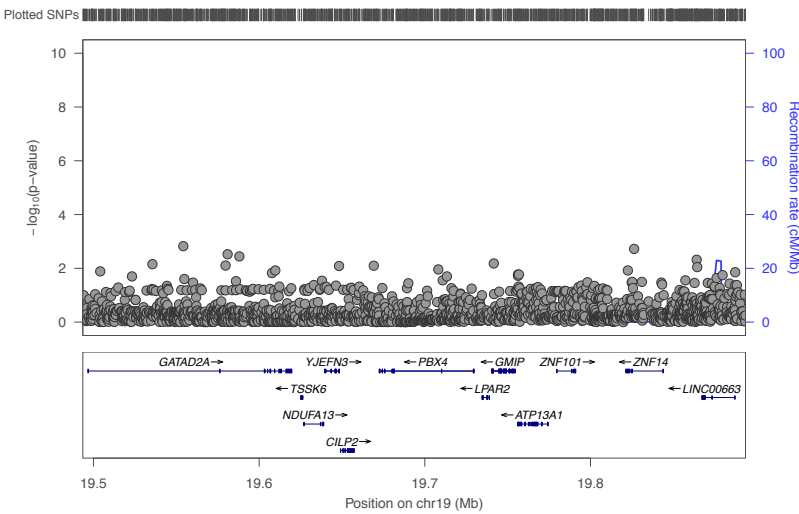

shortsleep\_1

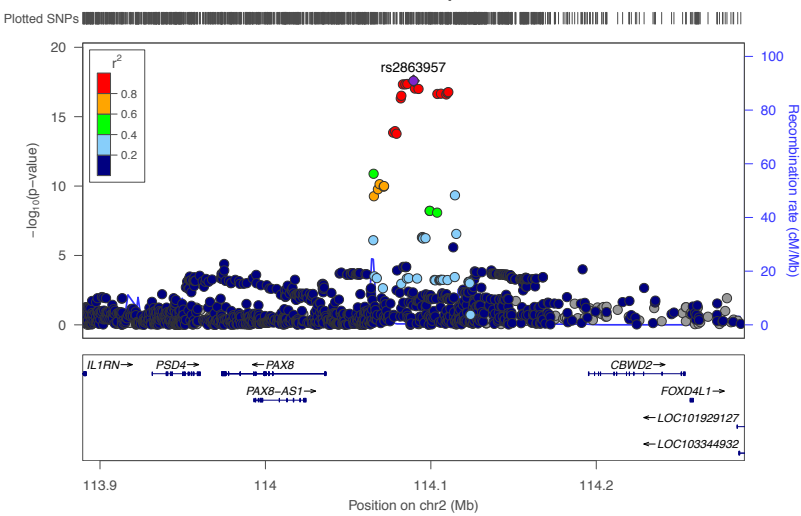

shortsleep\_2

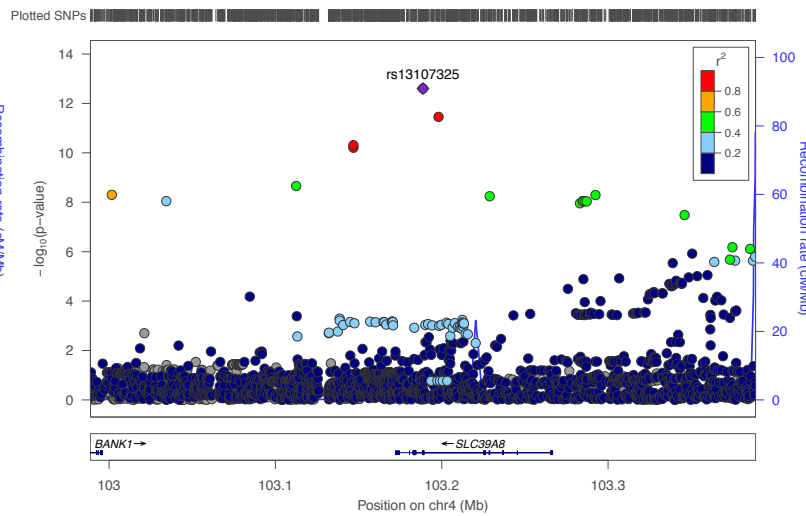

shortsleep\_3

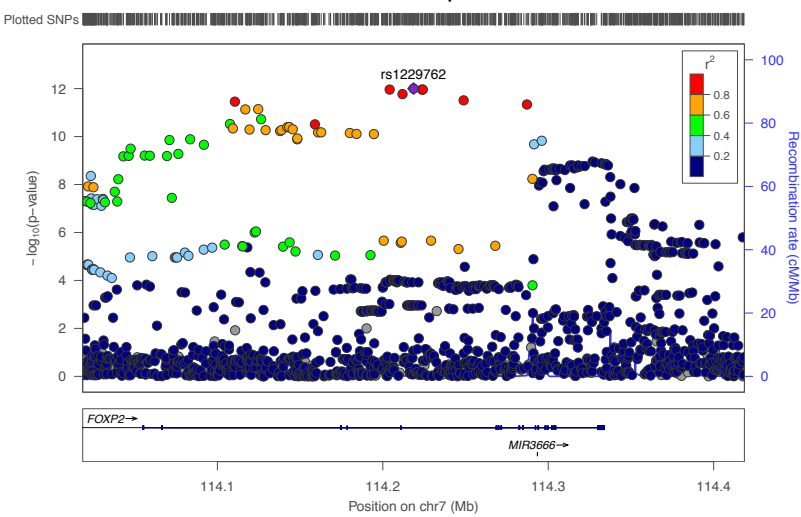

shortsleep\_4

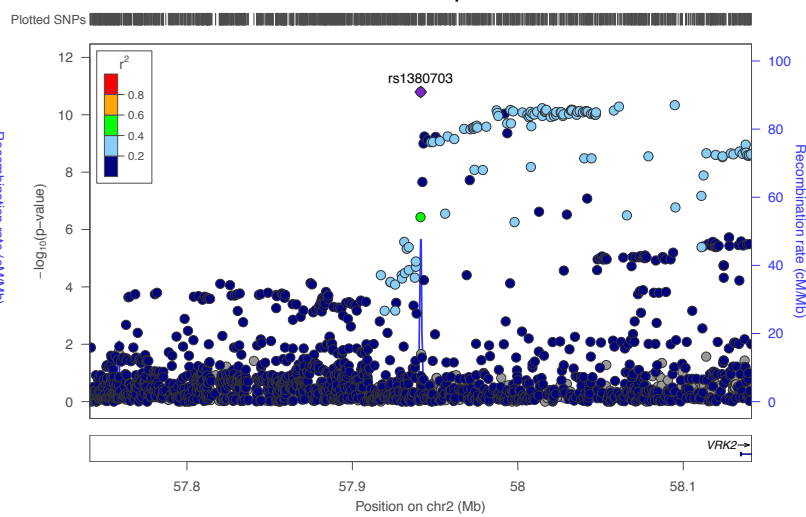

shortsleep\_5

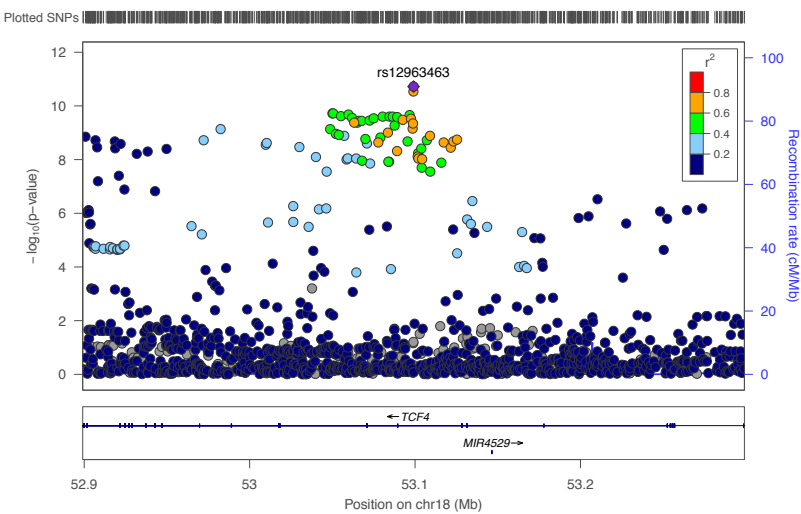

shortsleep\_6

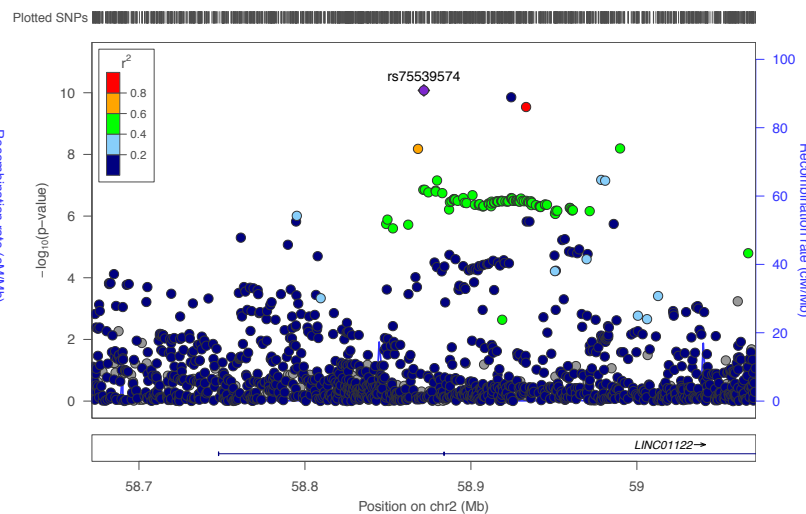

shortsleep\_7

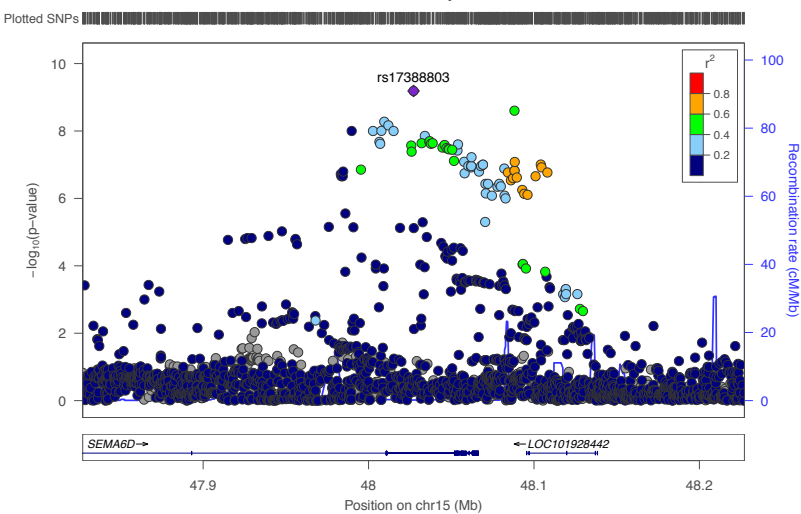

shortsleep\_8

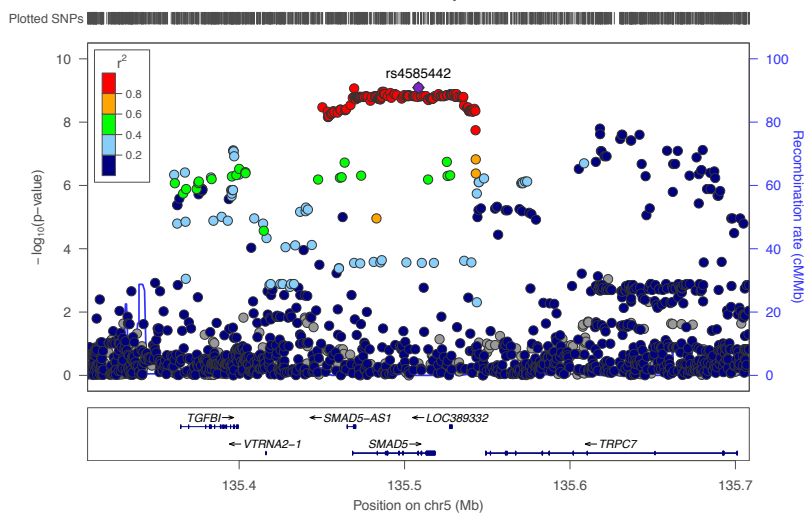

shortsleep\_9

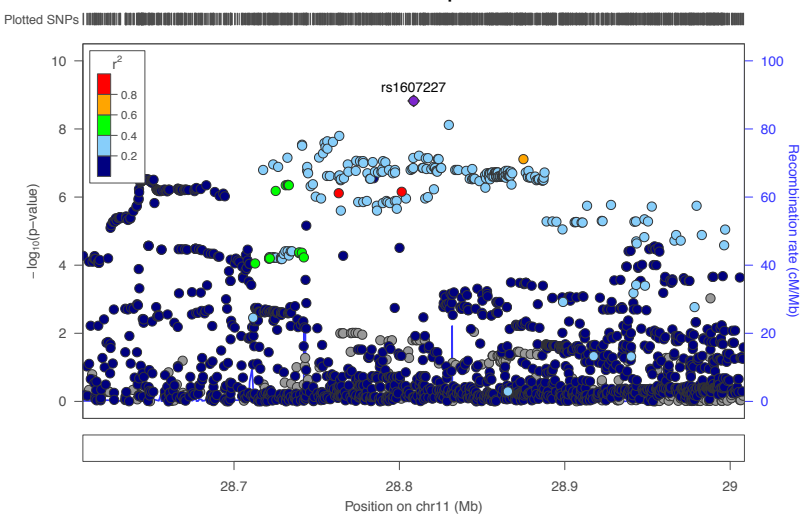

shortsleep\_10

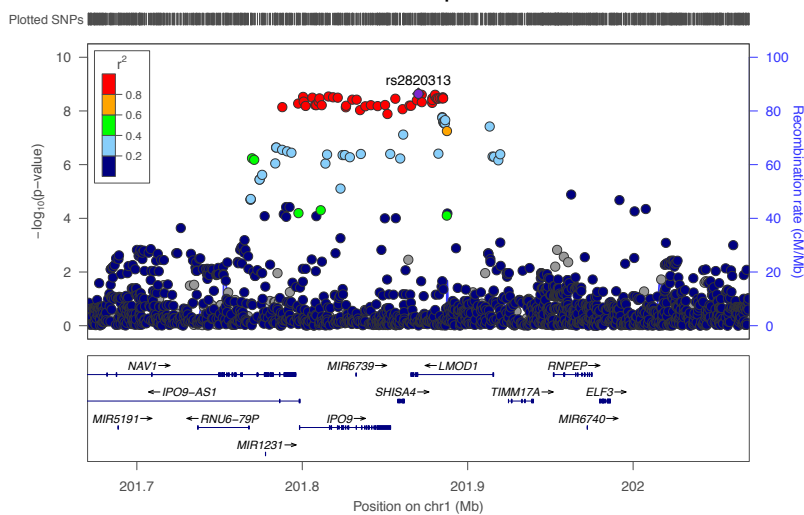

shortsleep\_11

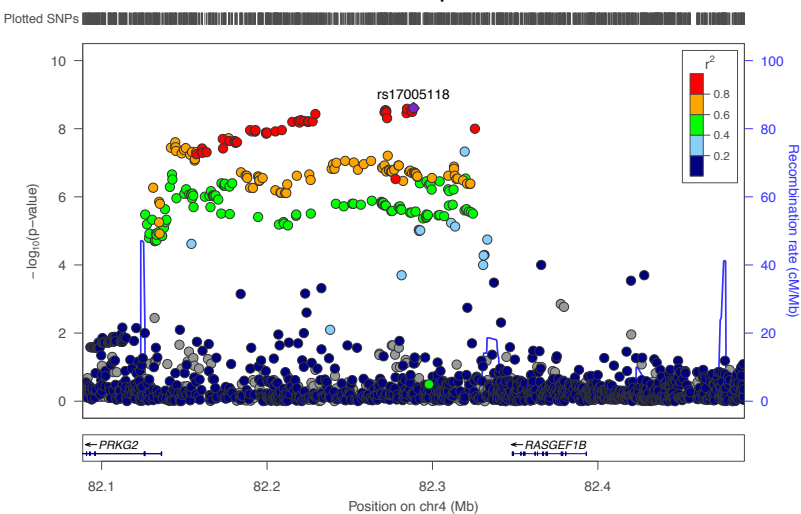

shortsleep\_12

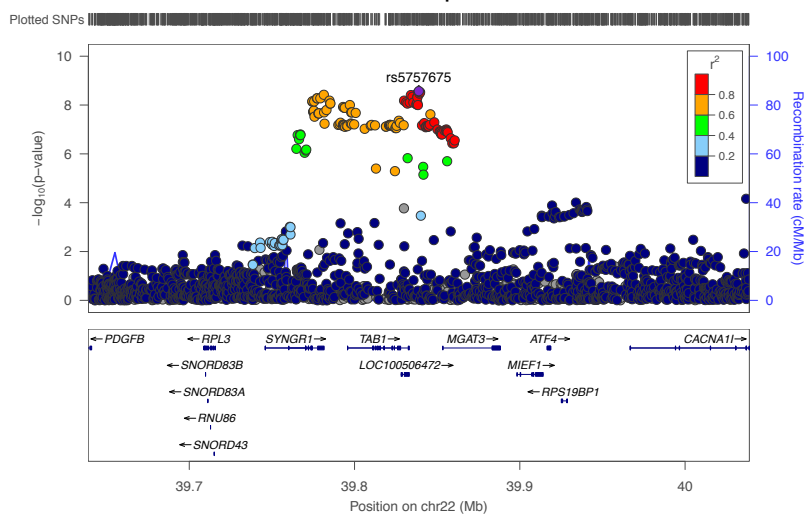



shortsleep\_13

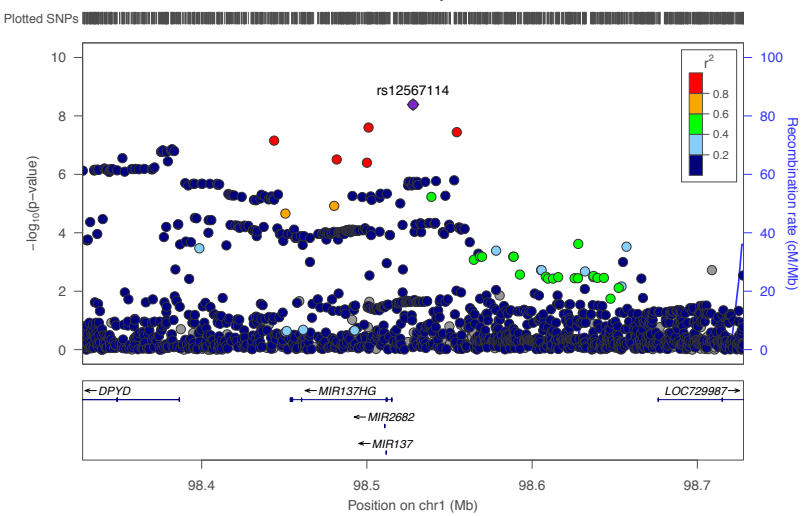

shortsleep\_14

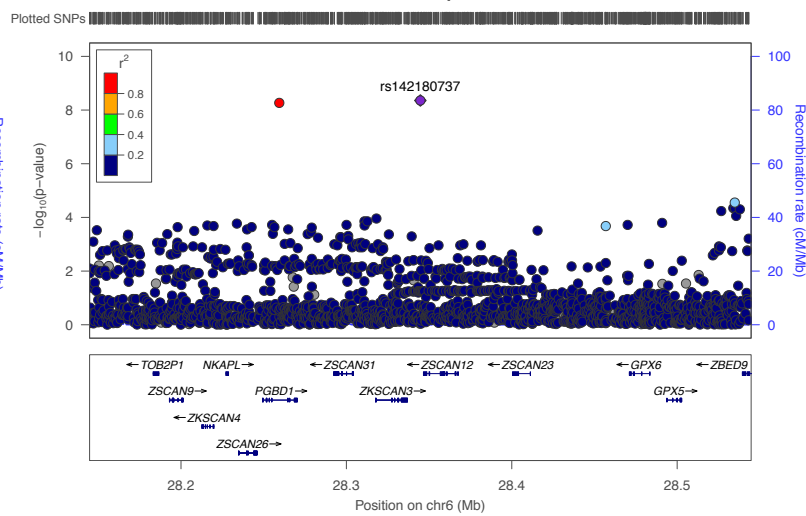

shortsleep\_15

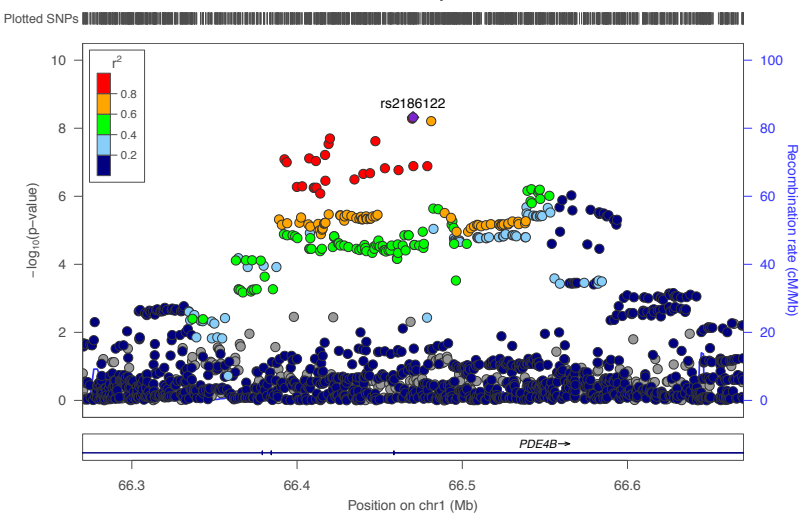

shortsleep\_16

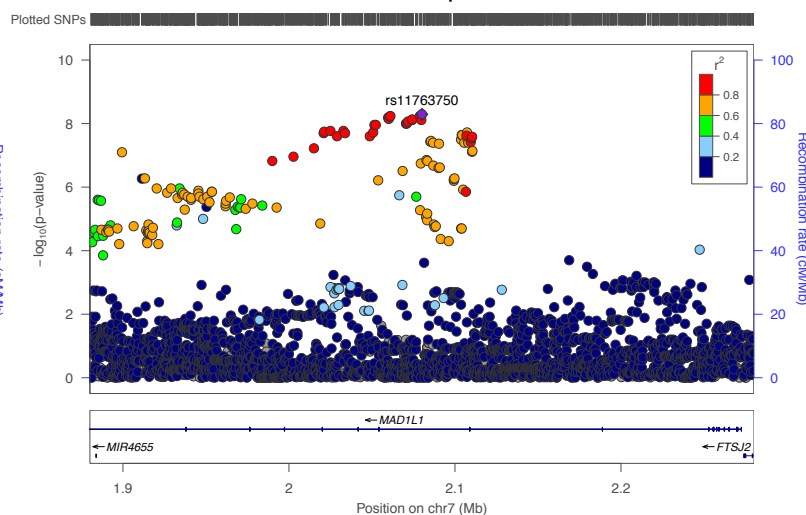

shortsleep\_17

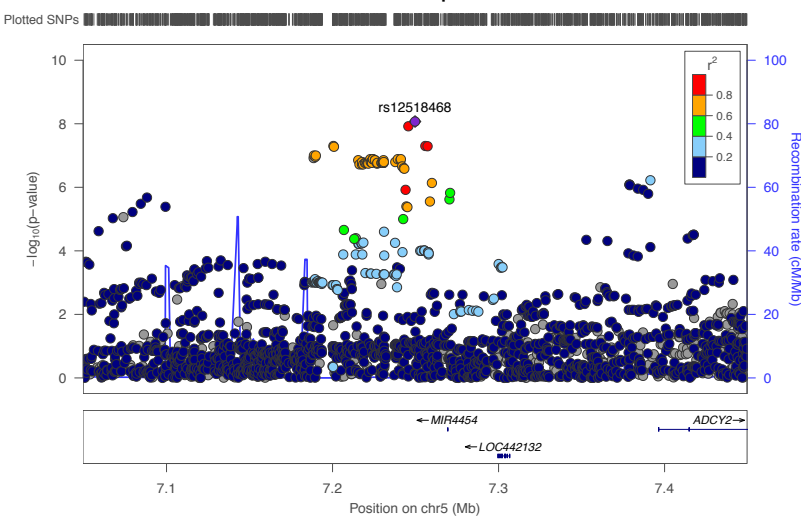

shortsleep\_18

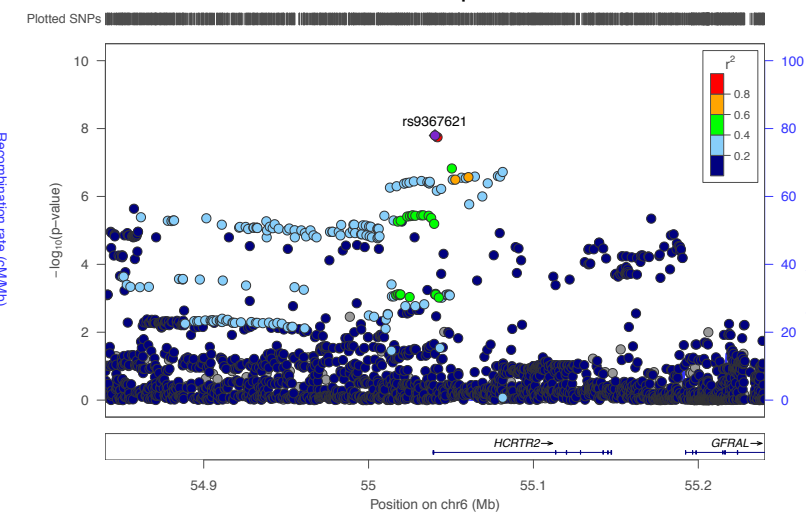

shortsleep\_19

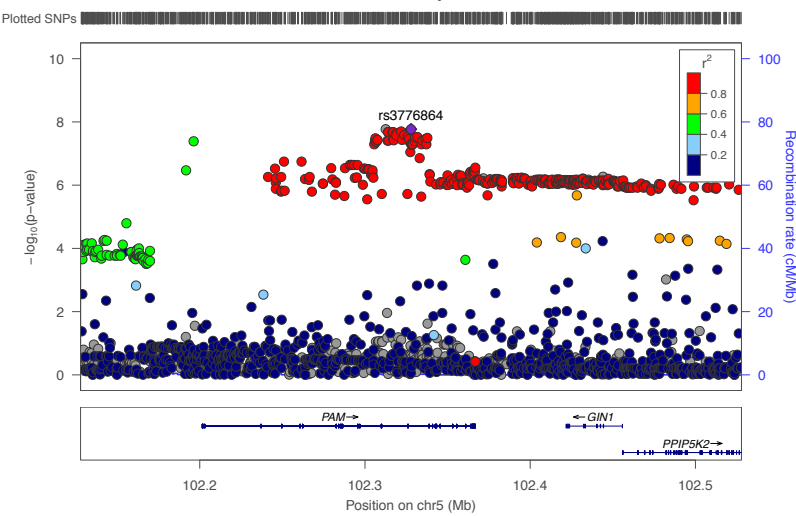

shortsleep\_20

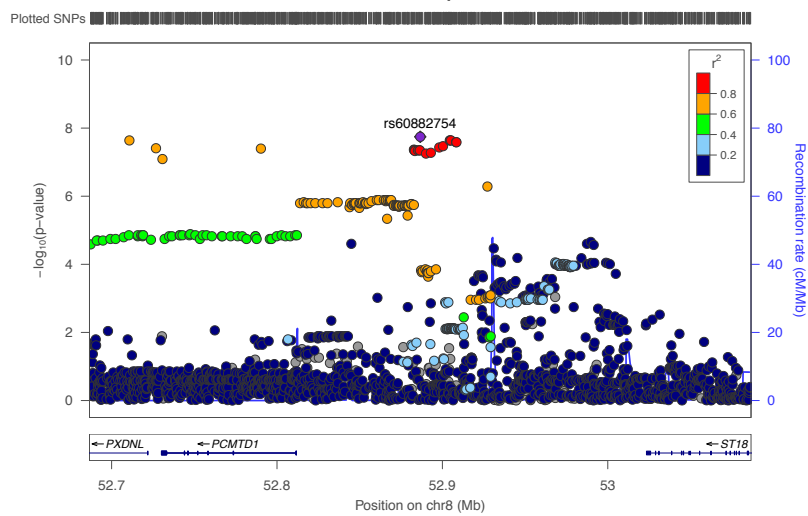

shortsleep\_21

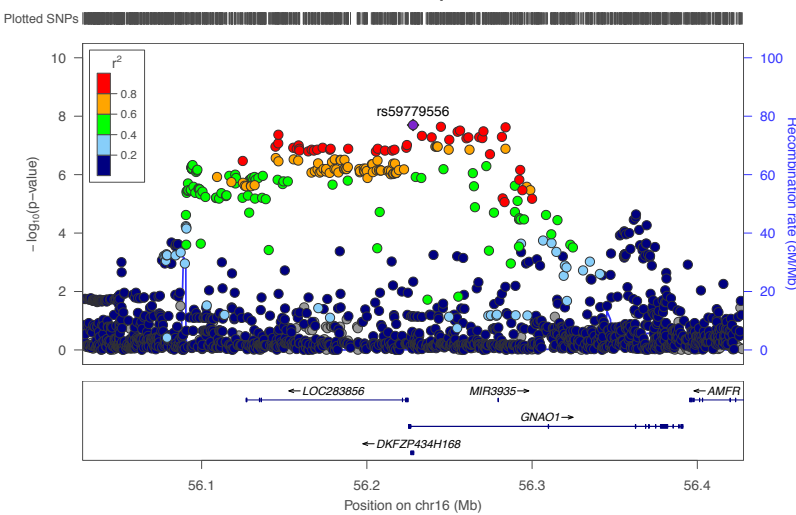

shortsleep\_22

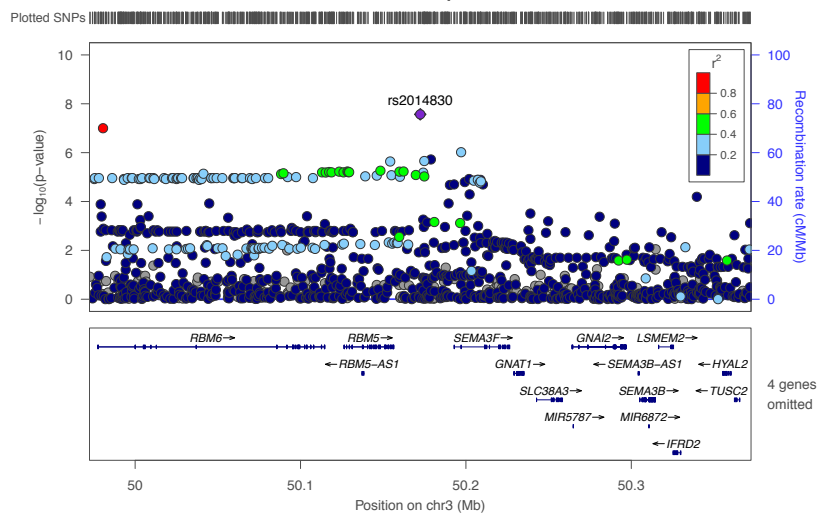

shortsleep\_23

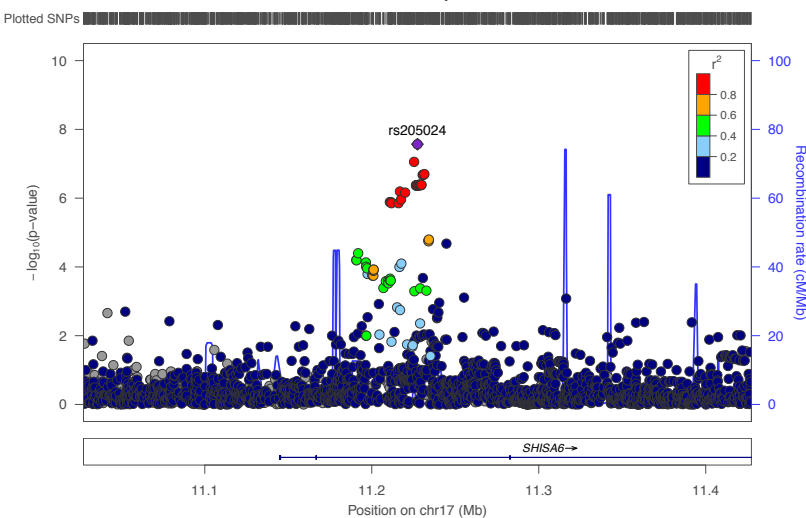

shortsleep\_24

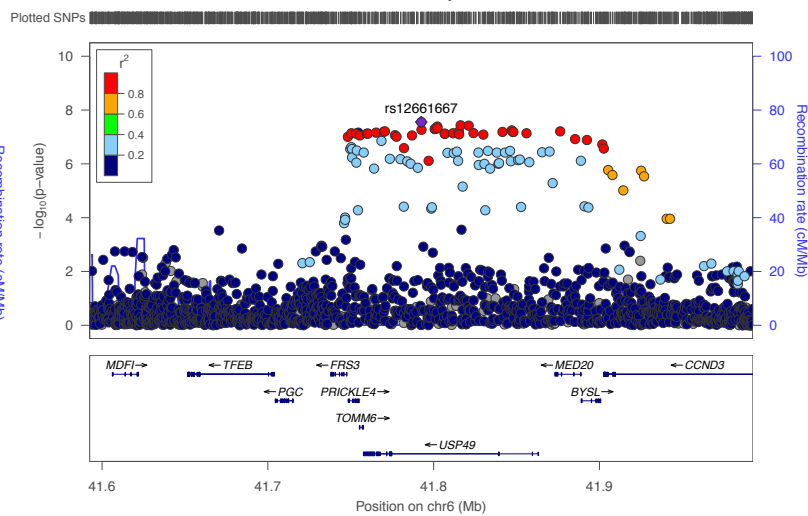

shortsleep\_25

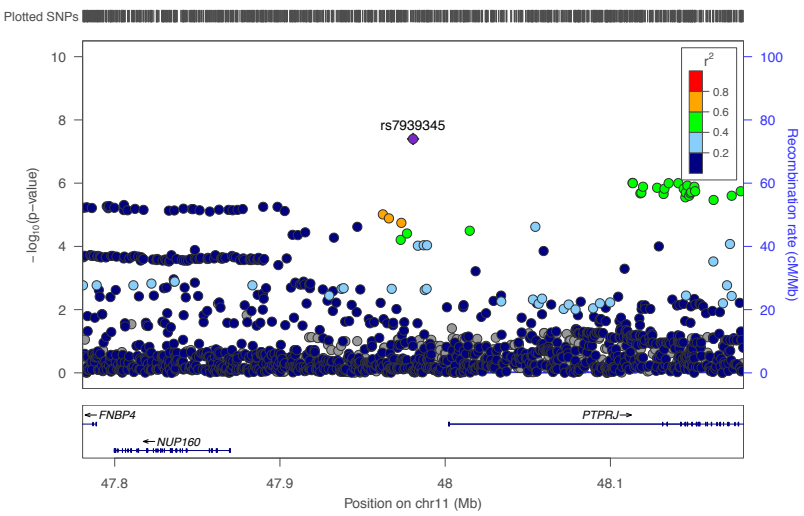

shortsleep\_26

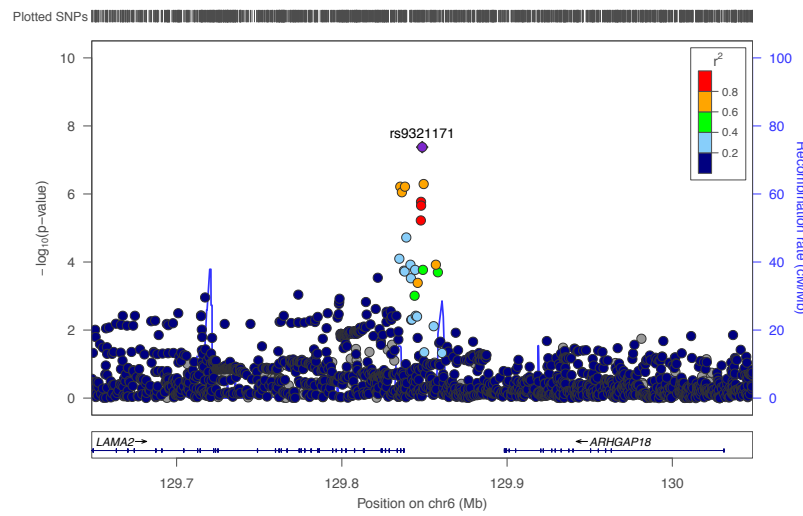

shortsleep\_27

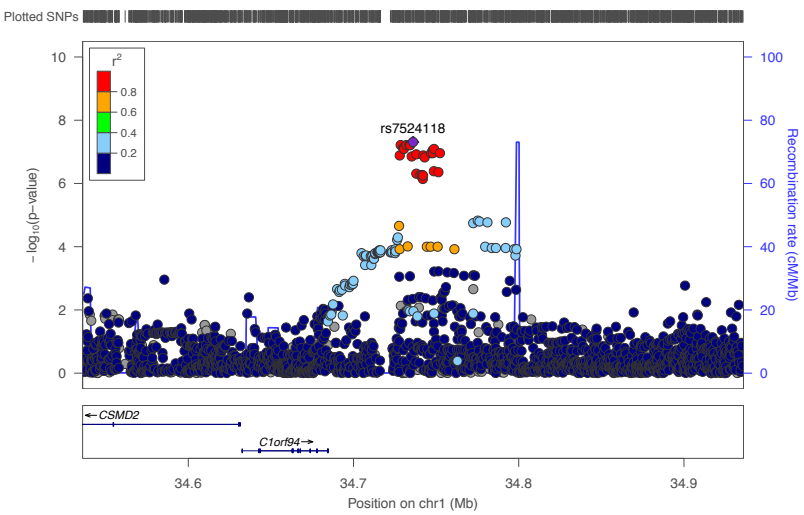

longsleep\_1

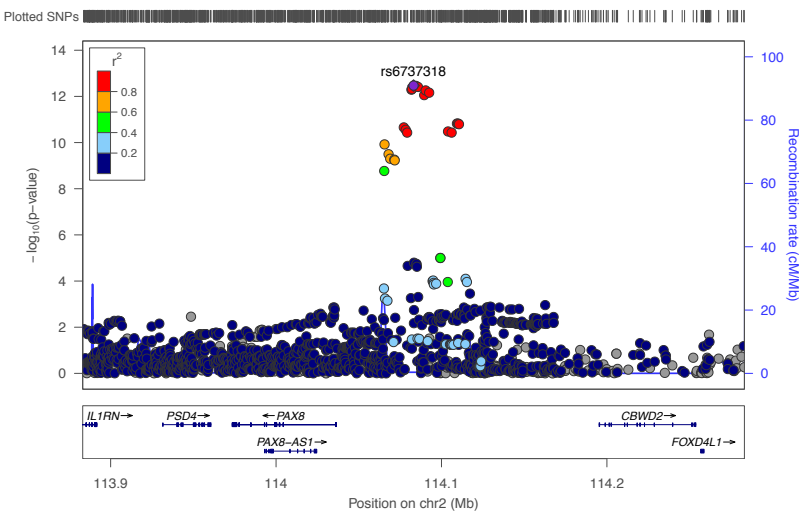

longsleep\_2

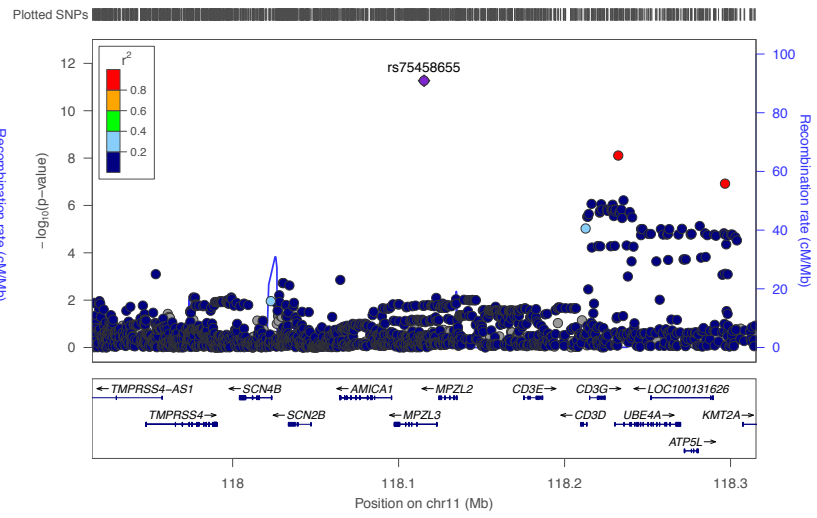

longsleep\_3

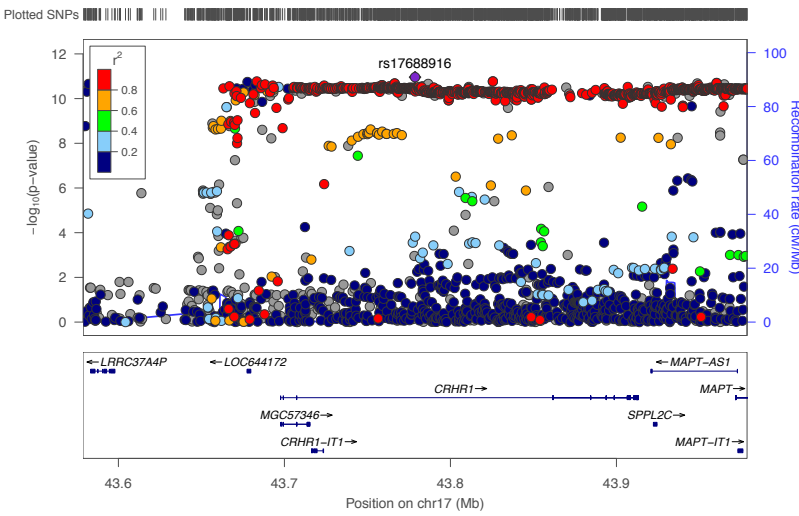

longsleep\_4

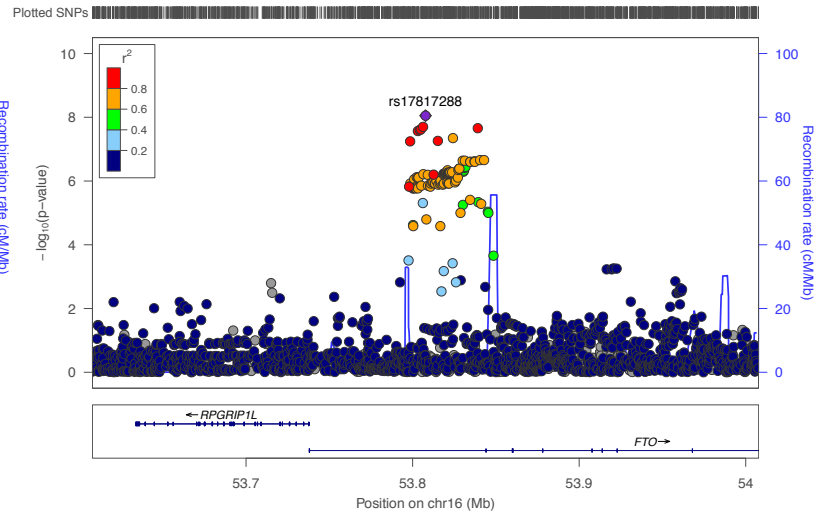

longsleep\_6

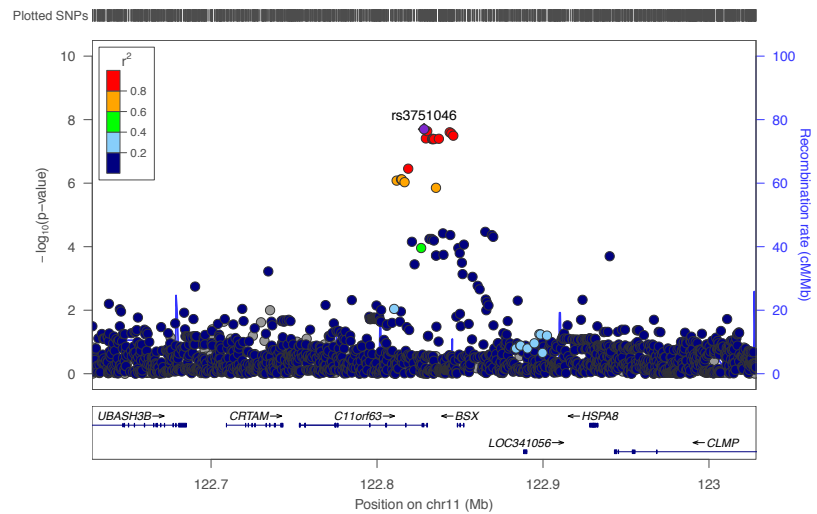



# longsleep\_7

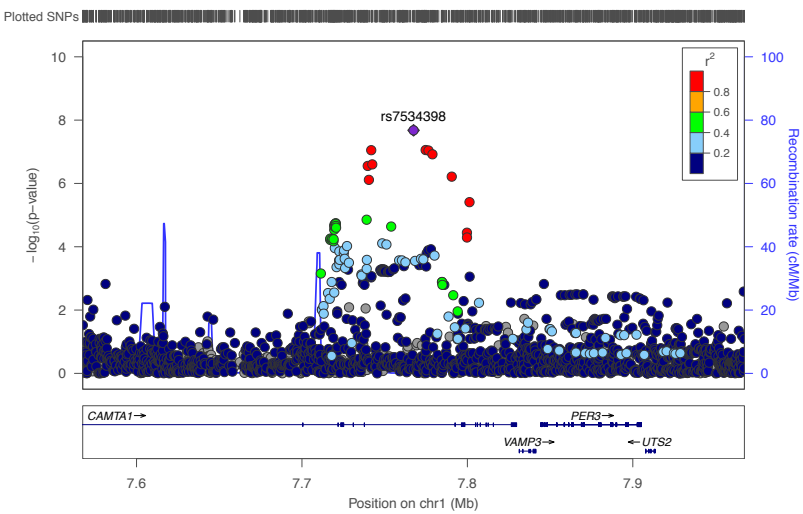

# longsleep\_8

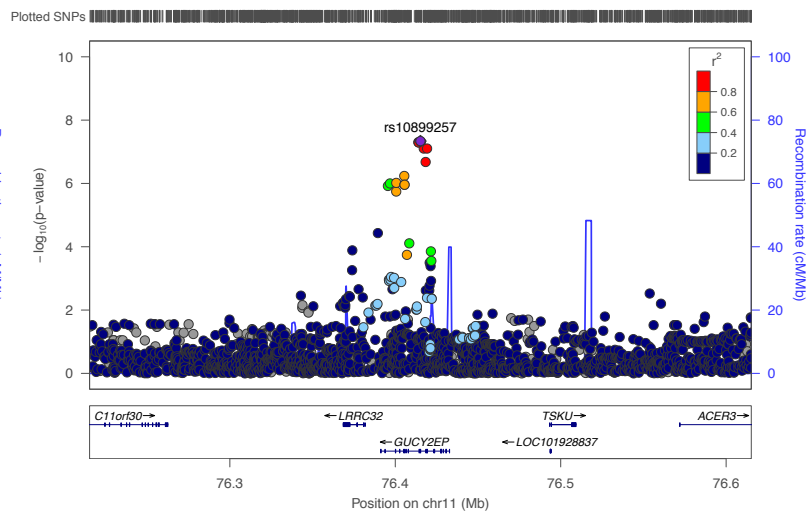

ma\_adult\_1

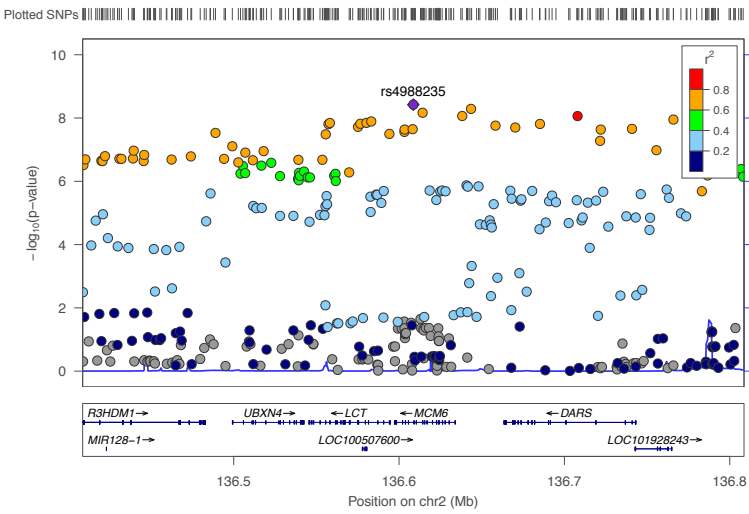

ma\_adult\_2

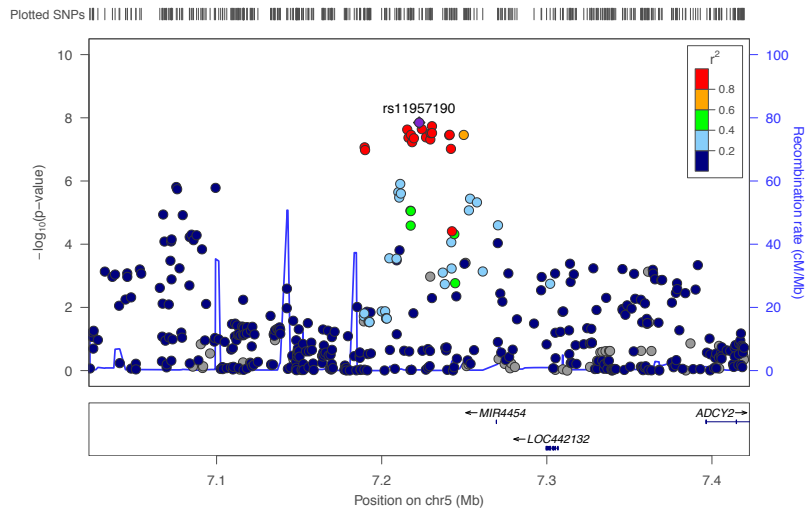

ma\_adult\_3

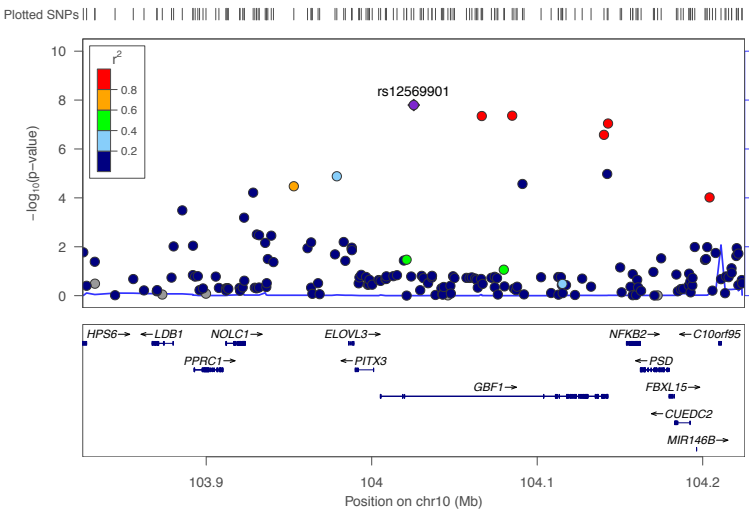

ma\_adult\_4

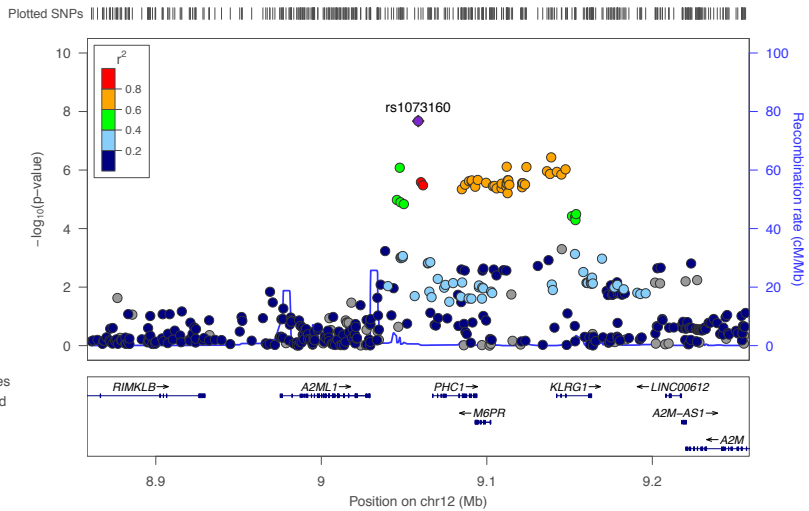

ma\_adult\_5

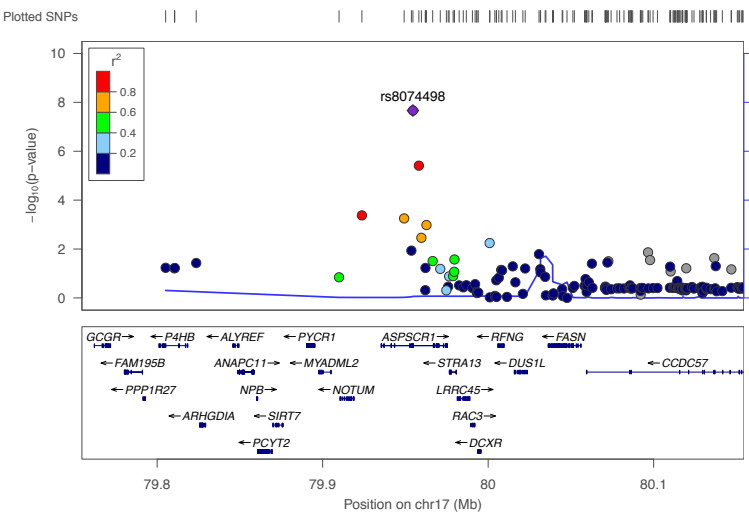

ma\_adult\_6

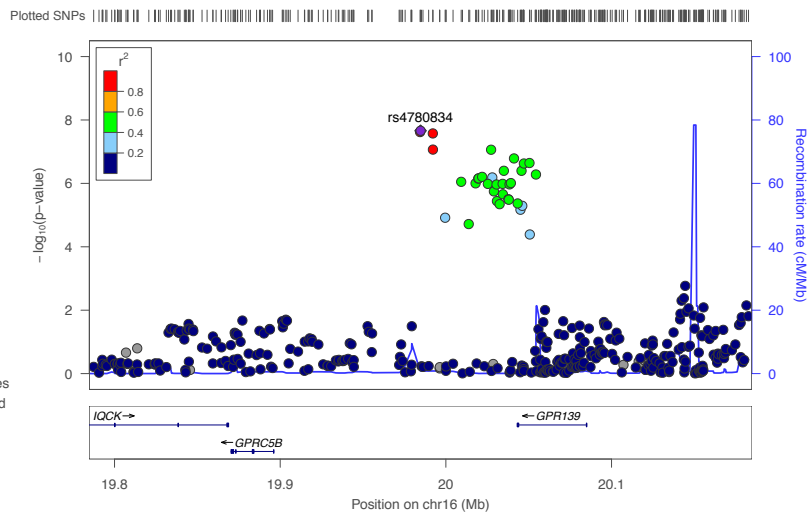

ma\_adult\_7

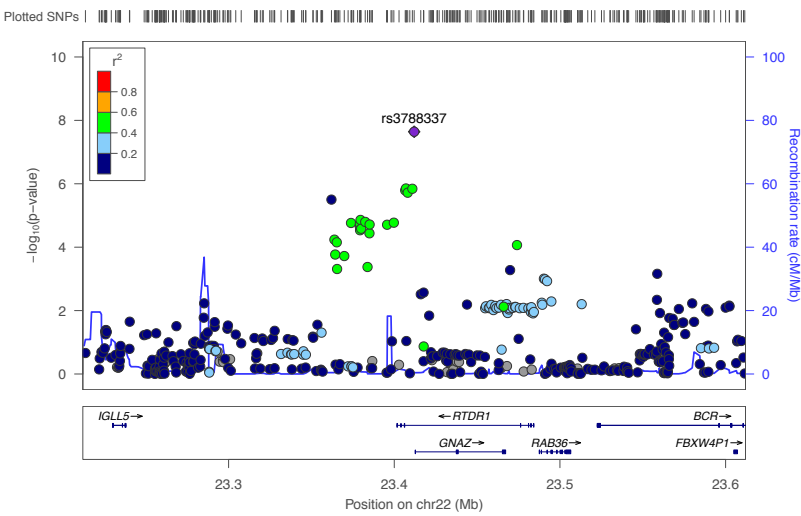

ma\_adult\_8

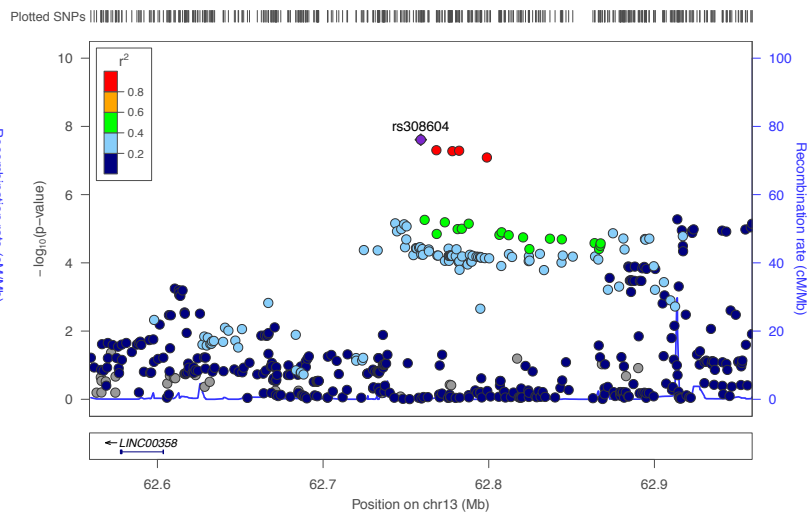

ma\_adult\_9

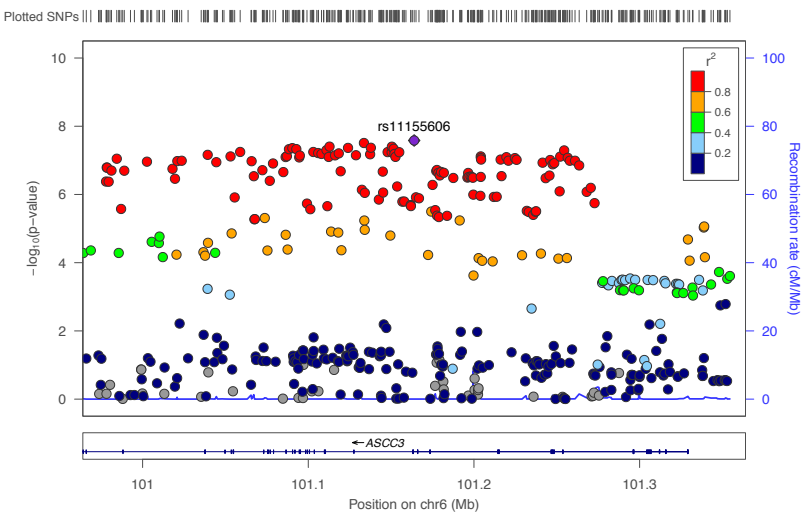

ma\_adult\_10

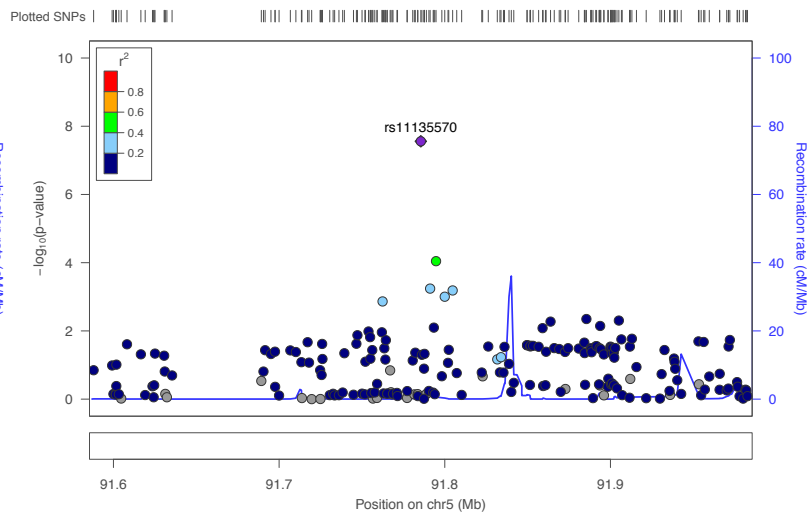

ma\_adult\_11

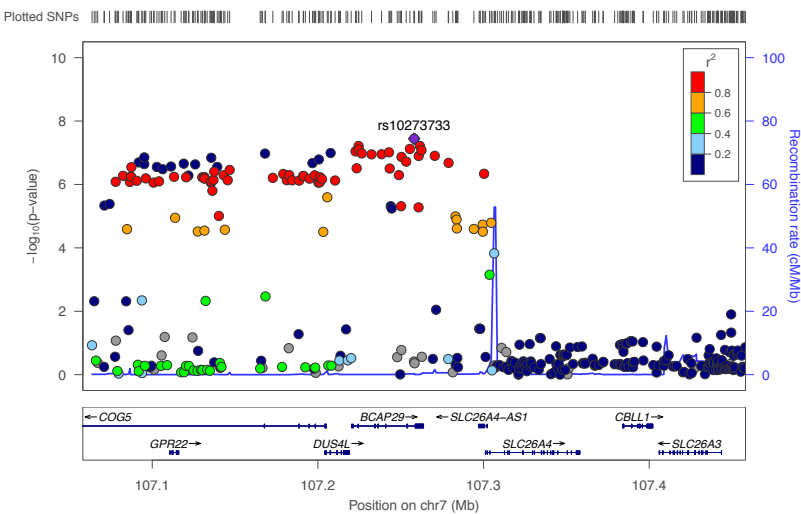

ma\_adult\_12

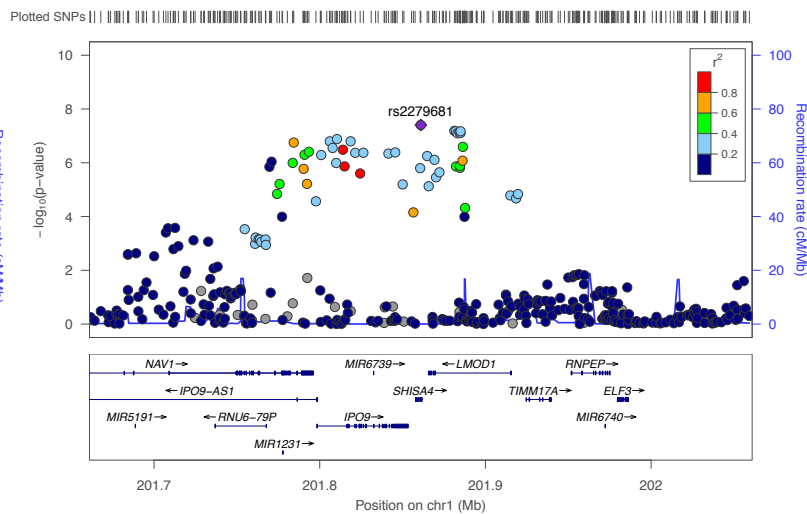

# ma\_adult\_13

Plotted SNPs

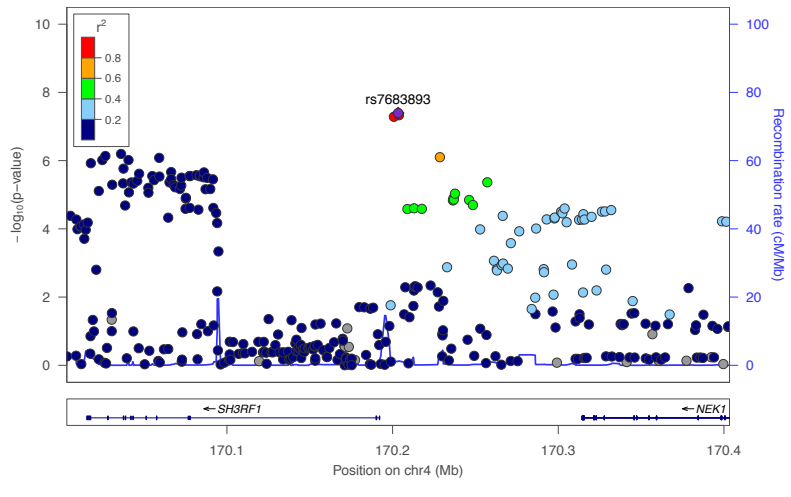



ma\_children\_1

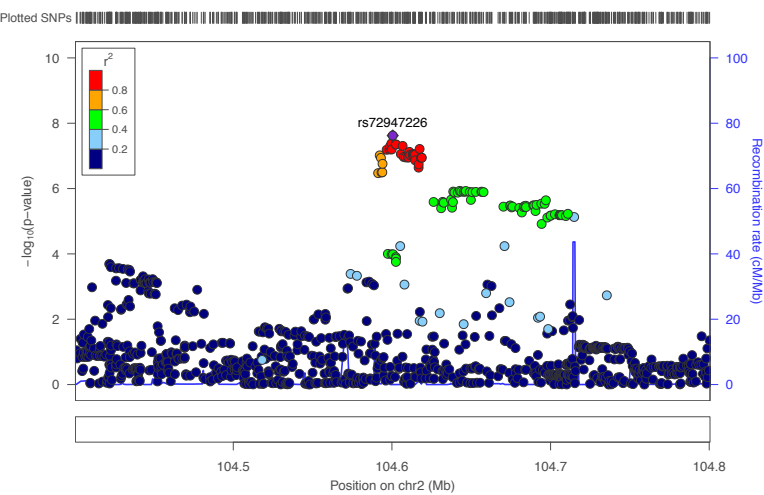

ma\_children\_2

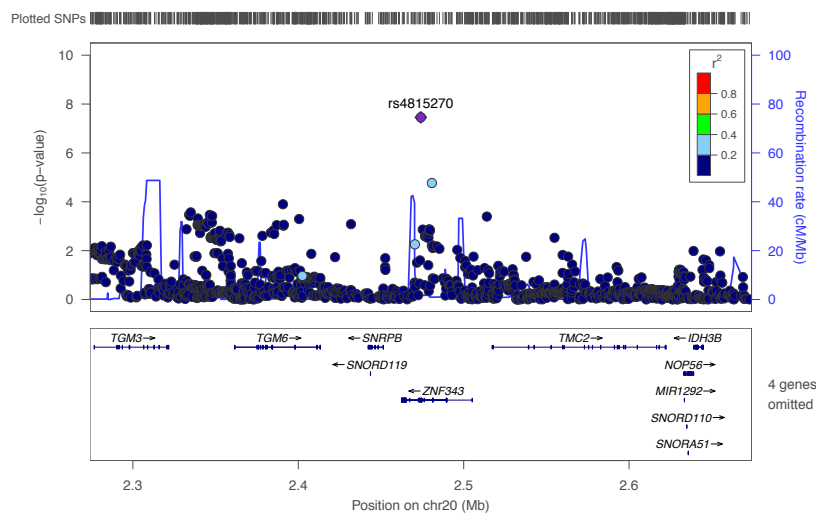

ma\_children\_3

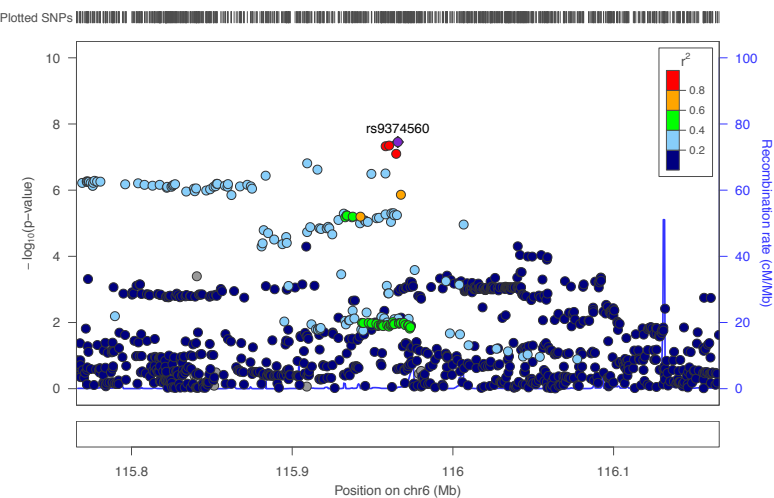

ma\_children\_4

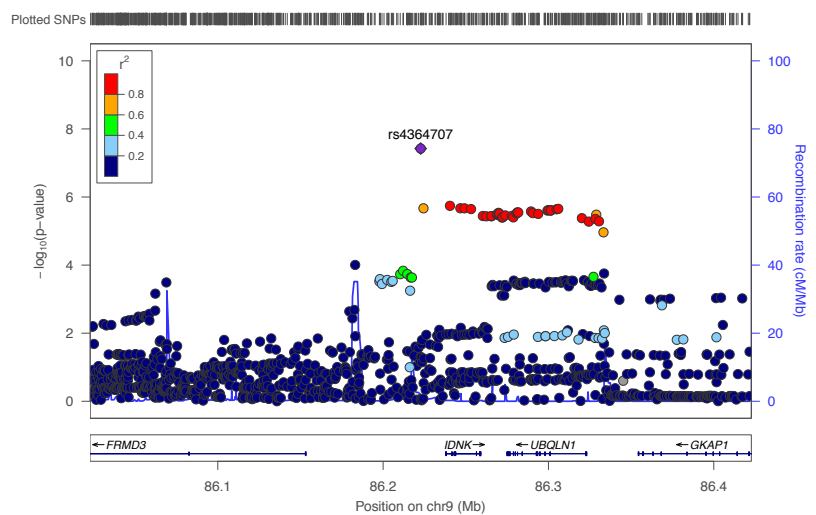

ma\_all\_1

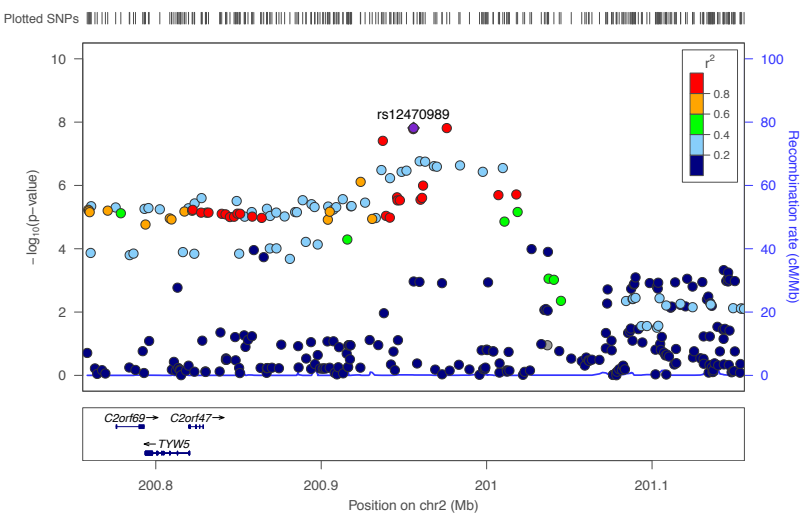

ma\_all\_2

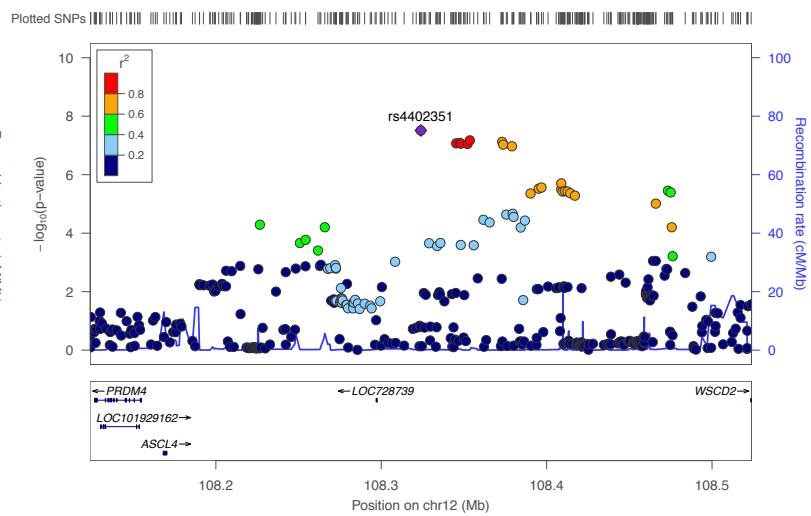

ma\_all\_3

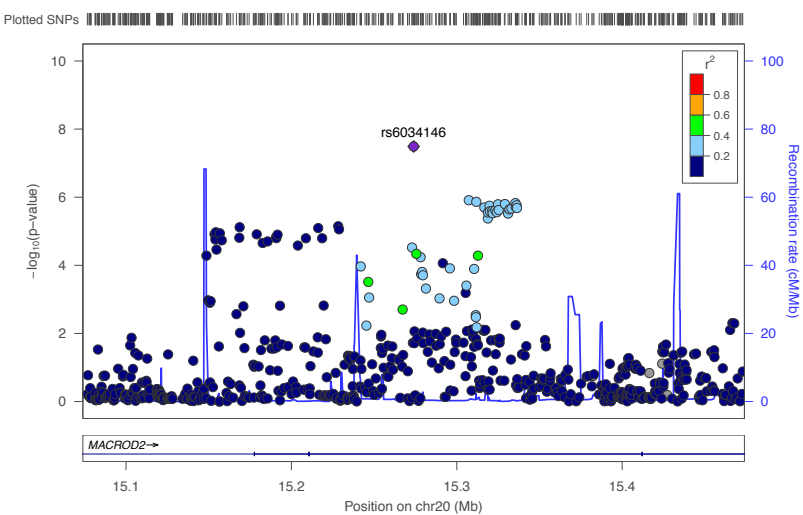

ma\_all\_4

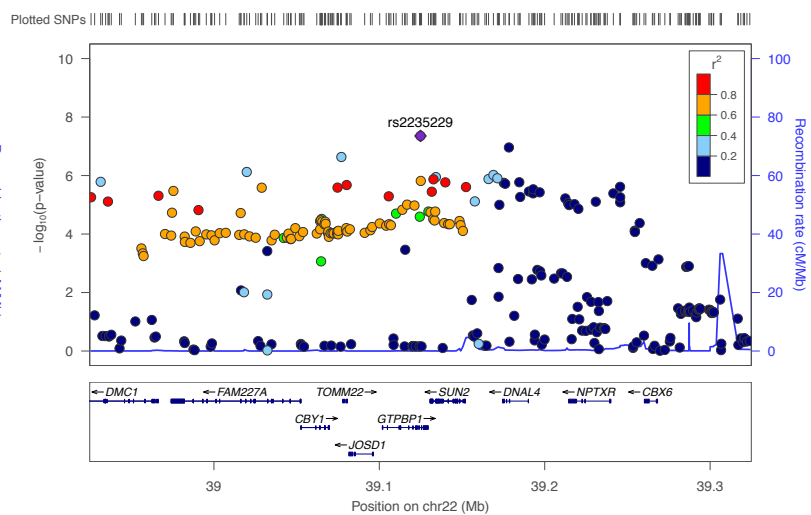

Supplement: 41467_2019_8917_MOESM5_ESM.pdf [file 41467_2019_8917_MOESM5_ESM.pdf]
