# Supplementary material for: Genome-wide association study identifies genetic loci for self-reported habitual sleep duration supported by accelerometer-derived estimates
Source: PubMed Central journal article supplement (PMC6405943; doi:10.1038/s41467-019-08917-4), 2019-03-07
Supplement: 41467_2019_8917_MOESM2_ESM.pdf [file 41467_2019_8917_MOESM2_ESM.pdf]

## **Supplementary Information**

**Genome-wide association study identifies genetic loci for self-reported habitual sleep duration supported by accelerometer-derived estimates**

**Dashti et al.**

**Table of Contents**

**SUPPLEMENTARY METHODS..... 3**

**SUPPLEMENTARY FIGURES ..... 5**

**SUPPLEMENTARY TABLES..... 17**

## Supplementary Method 1. Medication lists.

**1. Sleep medications:** oxazepam, meprobamate, medazepam, bromazepam, lorazepam, clobazam, chlormezanone, temazepam, nitrazepam, lormetazepam, diazepam, zopiclone, triclofos, methyprylone, prazepam, triazolam, ketazolam, dichloralphenazone, clomethiazole, zaleplon, butobarbital.

**2. Antidepressants:** amitriptyline, citalopram, fluoxetine, sertraline, venlafaxine, dosulepin, paroxetine, mirtazapine, escitalopram, trazodone, prozac, seroxat, cipralex, duloxetine, lofepramine, clomipramine, nortriptyline, imipramine, dothiepin, cipramil, amitriptyline, prothiaden, trimipramine, lustral, reboxetine, zispin, cymbalta, anafranil, doxepin, moclobemide, phenelzine, fluvoxamine, yentreve, triptafen, surmontil, tranlycypromine, allegron, edronax, molipaxin, mianserin, nardil, faverin, nefazodone, amitriptyline+chlordiazepoxide, isocarboxazid, manerix, maoi, sinequan, tranlycypromine+trifluoperazine, ludiomil, norval, tryptizol, and fluphenazine hydrochloride+nortriptyline.

**3. Antipsychotics:** prochlorperazine, olanzapine, quetiapine, risperidone, chlorpromazine, trifluoperazine, amisulpride, sulpiride, seroquel, haloperidol, aripiprazole, stelazine, depixol, flupentixol, clozapine, promazine, risperdal, modcate, fluanxol, flupentixol, zyprexa, zuclopentixol, clopixol, largactil, abilify, fluphenazine, haldol, serenace, clozaril, cpz, perphenazine, levomepromazine, pericyazine, dolmatil, fentazin, fluphenazine, benperidol, pimozide, zaponex, denzapine, neulactil, thioridazine, dozic, fluspirilene, panadeine, and sertindole.

**4. Anxiolytics:** zopiclone, diazepam, temazepam, zolpidem, nitrazepam, lorazepam, hydroxyzine, zimovane, phenergan, promethazine, buspirone, atarax, oxazepam, loprazolam, chlordiazepoxide, lormetazepam, ucerax, stilnoct, diazepam, buspar, alprazolam, librium, xanax, meprate, dalmane, clomethiazole, meprobamate, welldorm, amitriptyline+chlordiazepoxide, flurazepam, heminevrin, medazepam, neulactil, sinequan, almazine, atensine, carisoma, chloractil, chloral, dichloralphenazone, dormonoct, methyprylone, mogadon, rohypnol, tryptizol.

**Supplementary Method 2.** Criteria for identifying participants with psychiatric disorders (<https://www.biorxiv.org/content/biorxiv/early/2017/08/01/168732.full.pdf>).

Cases of psychiatric disorder was determined using any of the following definitions (derived from Howard et al.):

- 1) ICD-10 codes for major depressive disorder (F32, F33), bipolar disorder (F30, F31), schizophrenia (F20-F29), autism (F84.0, F84.3, F84.5), intellectual disability (F70.0, F70.1, F70.9), anxiety disorder (F40 - F43), multiple personality disorder (F44.8), or mood disorder (F30 - F39).
- 2) Self-reported antidepressant, antipsychotic, or anxiolytic use at nurse-led interview.
- 3) Self-reported depression, major depressive disorder, bipolar disorder, or schizophrenia at nurse-led interview.
- 4) "Broad depression": responded yes to the question "Have you ever seen a general practitioner (GP) for nerves, anxiety, tension or depression?" and yes to either, "have you ever had a time when you were feeling depressed or down for at least a whole week," or, "Have you ever had a time when you were uninterested in things or unable to enjoy the things you used to for at least a whole week?" lasting for more than 1 week.
- 5) Questionnaire-assessed bipolar disorder (Smith algorithm<sup>1</sup>): responded yes to the question, "Have you ever had a period of time lasting at least two days when you were feeling so good, "high", excited or "hyper" that other people thought you were not your normal self or you were so "hyper" that you got into trouble?" or "Have you ever had a period of time lasting at least two days when you were so irritable that you found yourself shouting at people or starting fights or arguments?" for a duration of at least one week and with at least 3 manic/hyper symptoms.

<sup>1</sup> Smith, D.J. et al. Prevalence and characteristics of probable major depression and bipolar disorder within UK Biobank: cross-sectional study of 172,751 participants. *PLoS ONE* 8,e75362 (2013).

**Supplementary Figure 1. Q-Q plots for genome-wide association of sleep traits.** Q-Q plots show the expected versus observed  $P$  values from our association analysis. Lambda inflation values ( $\lambda$ ) were computed using GenABEL in R.

**a. Sleep duration ( $\lambda = 1.432$ )**

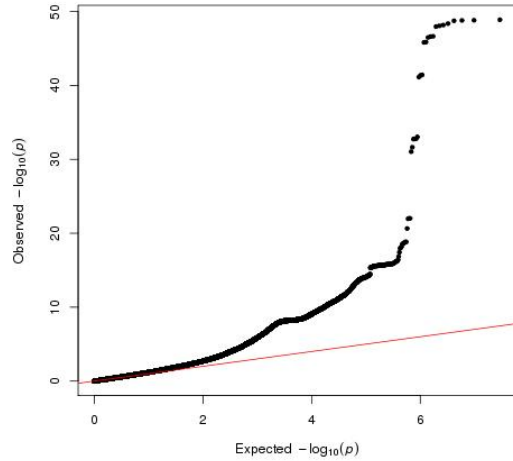

**b. Sleep duration (add' exclusions) ( $\lambda = 1.344$ )**

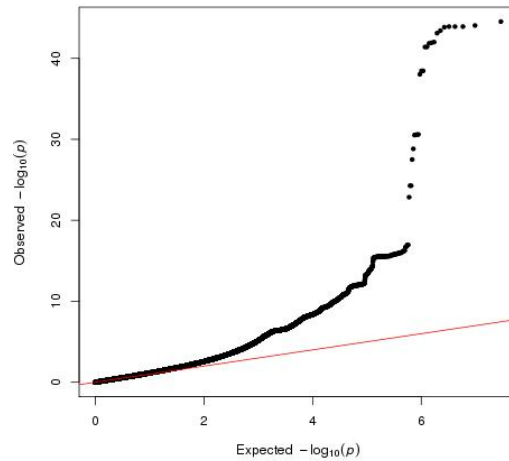

**c. Sleep duration (men) ( $\lambda = 1.177$ )**

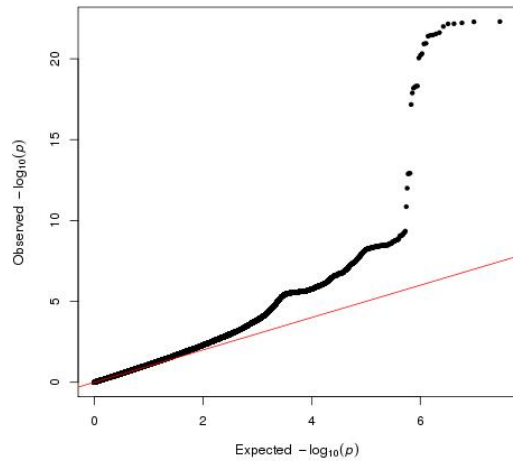

**d. Sleep duration (women) ( $\lambda = 1.229$ )**

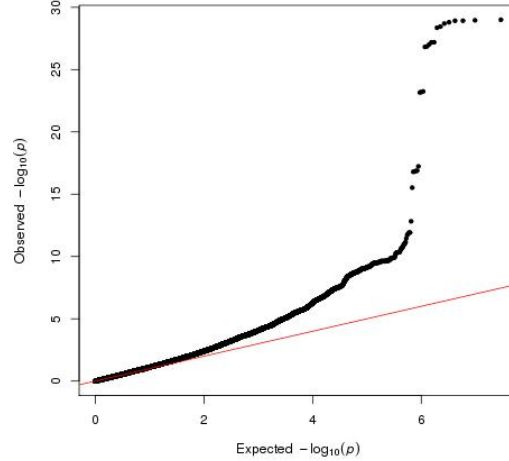

**e. Short sleep ( $\lambda = 1.262$ )**

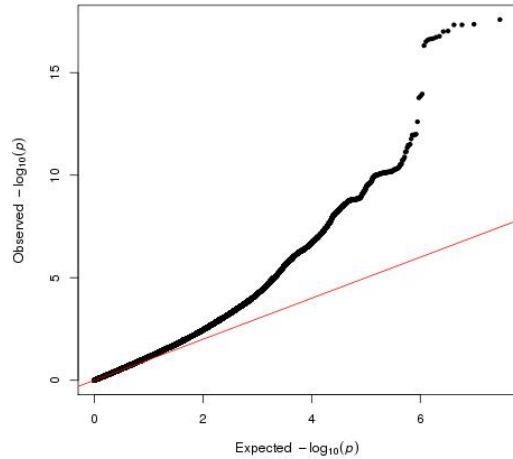

**f. Long sleep ( $\lambda = 1.160$ )**

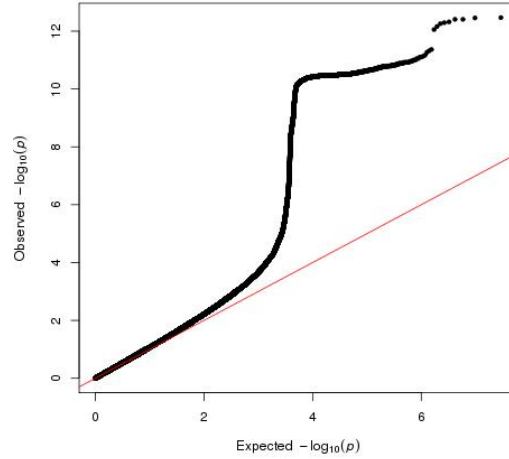

**Supplementary Figure 2. Manhattan plot for genome-wide association analysis of sleep duration with additional exclusions ( $n = 326,224$ ).** Manhattan plot shows the  $-\log_{10} P$  values (y-axis) for all genotyped and imputed SNPs passing quality control, plotted by chromosome (x-axis). Blue peaks represent genome-wide significant loci. Novel loci are annotated. Horizontal red line denotes genome-wide significance ( $5 \times 10^{-8}$ ).

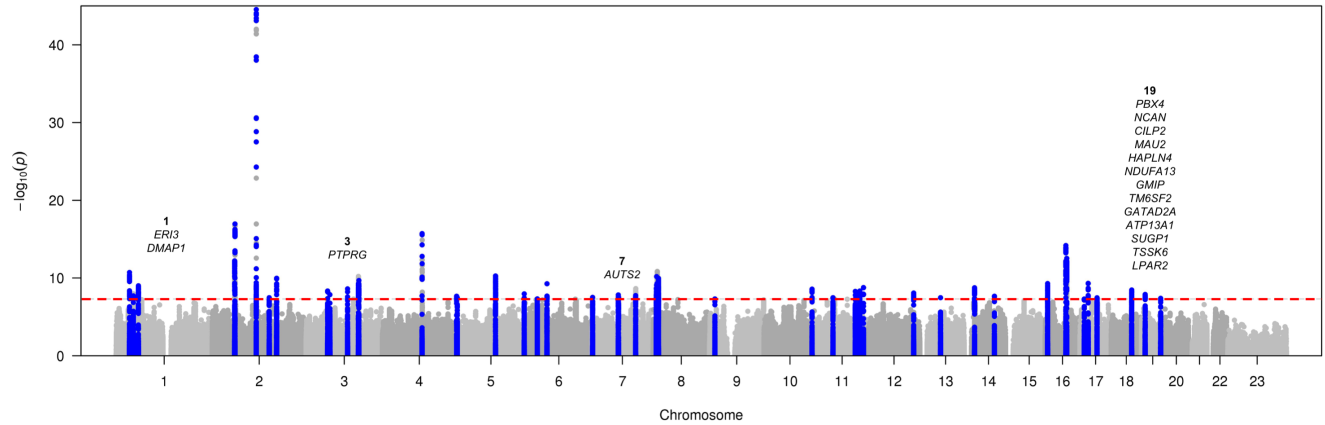

**Supplementary Figure 3. Manhattan plots for genome-wide association analysis of sex-stratified sleep duration.** Manhattan plots a and b show the  $-\log_{10} P$  values (y-axis) for all genotyped and imputed SNPs passing quality control in each GWAS, plotted by chromosome (x-axis). Blue peaks represent genome-wide significant loci. Horizontal red line denotes genome-wide significance ( $5 \times 10^{-8}$ ).

**a. Men**

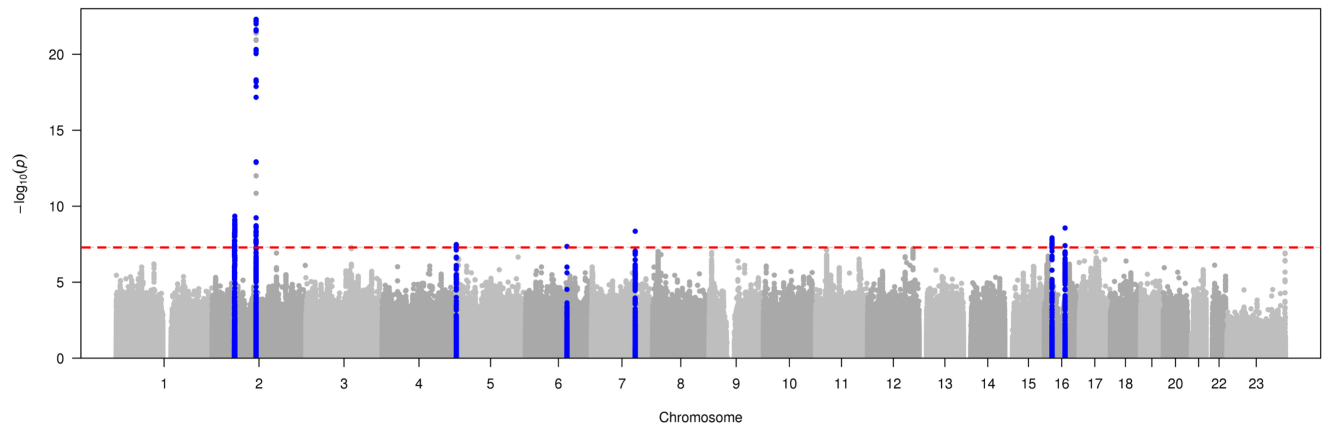

**b. Women**

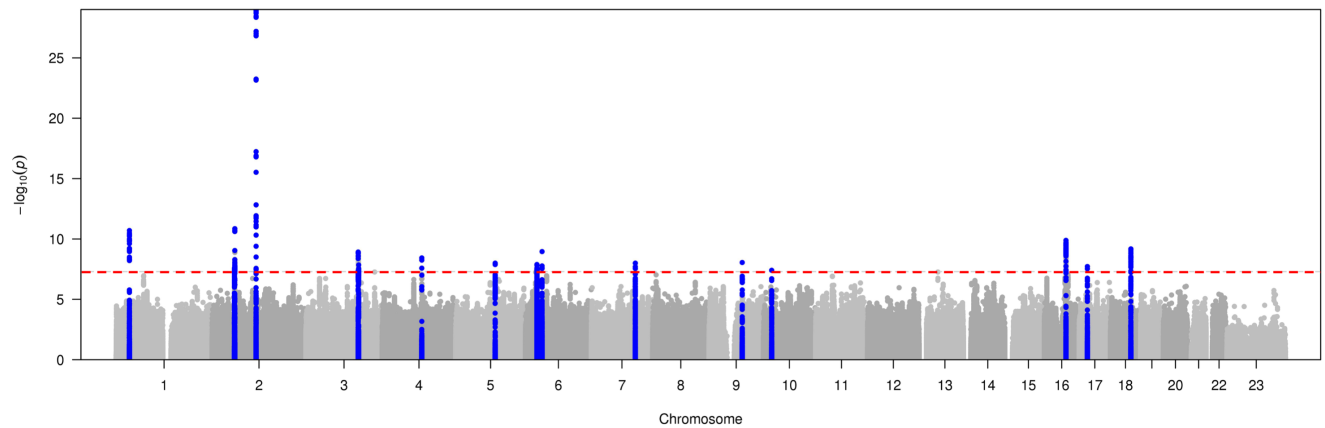

**Supplementary Figure 4.** Comparison of short and long sleep GWAS effect estimates of 8 long sleep signals. Odds Ratio (OR) reflects the odds of having short/long sleep per each additional effect allele, and error bars indicate 95% CI. Abbreviations: OR=odds ratio; CI=confidence interval. Association effect estimates in this figure can be found in **Supplementary Table 5**.

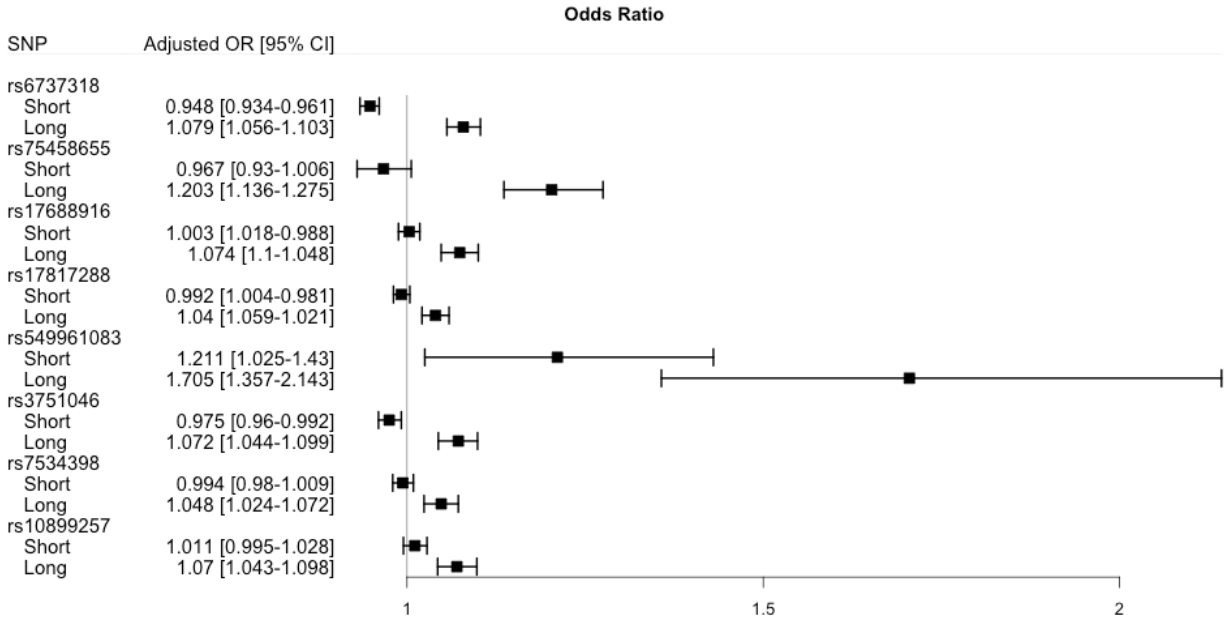



**Supplementary Figure 5. Manhattan plots for genome-wide association meta-analyses.** Manhattan plots show the  $-\log_{10} P$  values (y-axis) for all genotyped and imputed SNPs passing quality control in each GWAS, plotted by chromosome (x-axis). Blue peaks represent additional novel genome-wide significant loci unraveled in meta-analysis. Horizontal red line denotes genome-wide significance ( $5 \times 10^{-8}$ ). SNPs with high heterogeneity ( $I^2 \geq 90$ ) were excluded. Association effect estimates in this figure can be found in tabular form in **Supplementary Data 7**.

**a. UK Biobank + CHARGE (adult) ( $n = 493,298$ )**

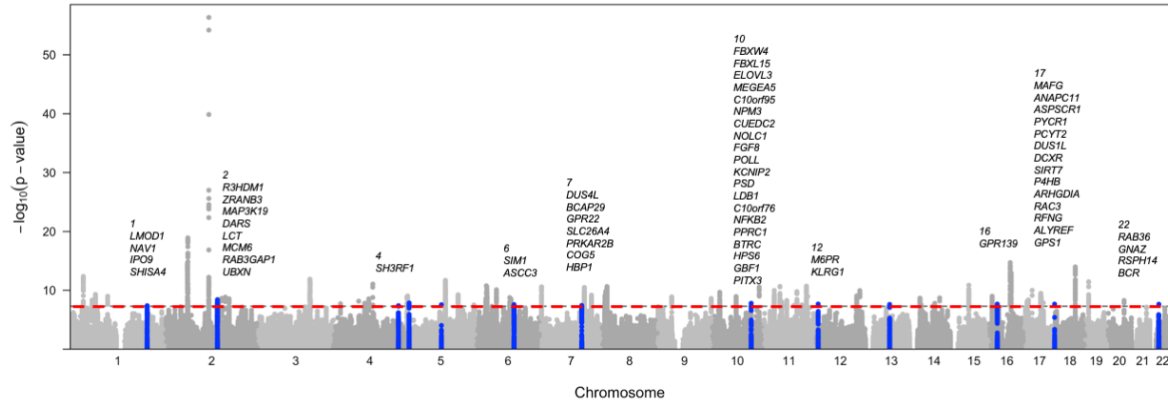

**b. UK Biobank + EAGLE (childhood/adolescent) ( $n = 456,672$ )**

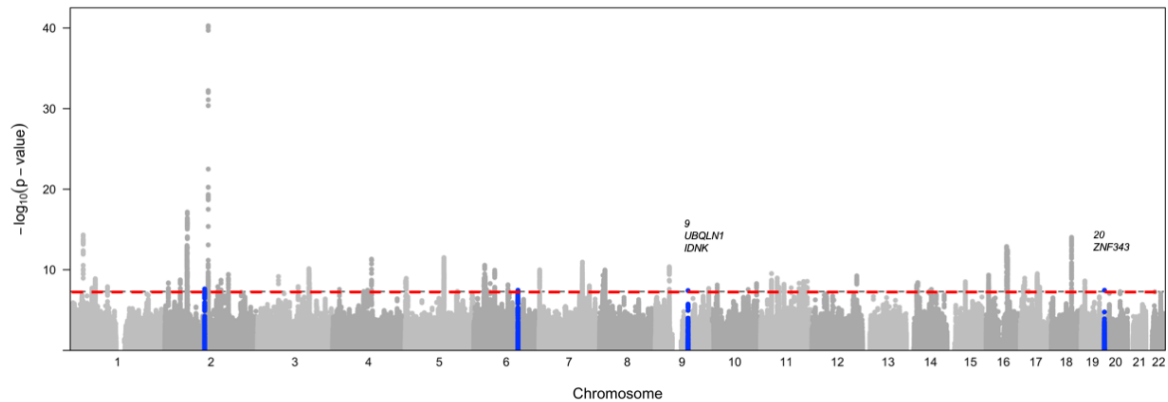

**c. UK Biobank + CHARGE + EAGLE ( $n = 503,852$ )**

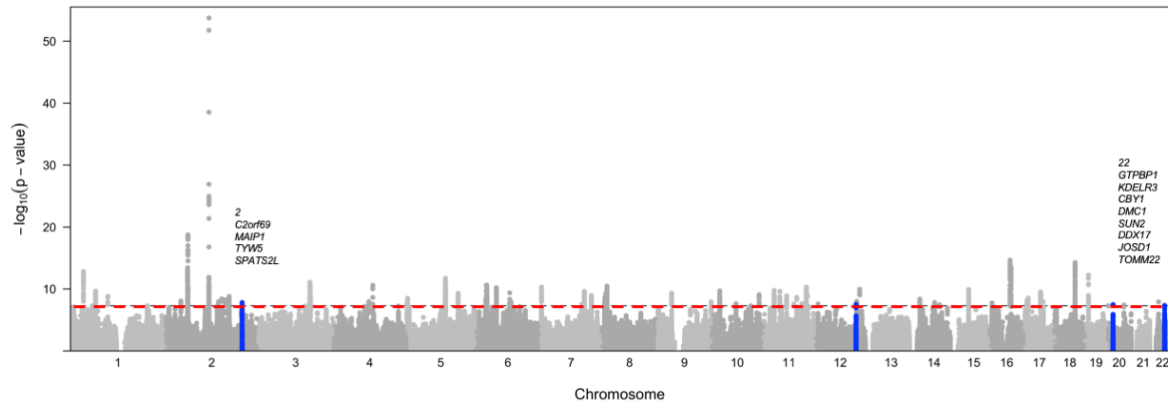

**Supplementary Figure 6.** Association of sleep loci (7 sleep duration loci, a–g; 5 short sleep loci, h–l; 3 long sleep loci, m–o) with brain imaging phenotypes in the UK Biobank (images from <http://big.stats.ox.ac.uk/>).

**a. Sleep duration (rs7556815) – *PAX8***

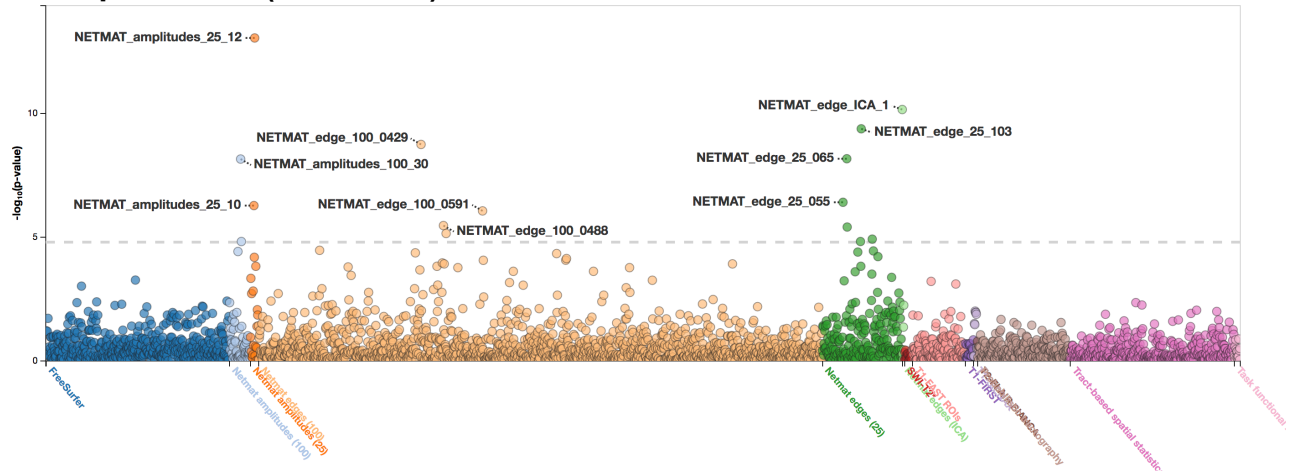

**b. Sleep duration (rs13109404) – *BANK1***

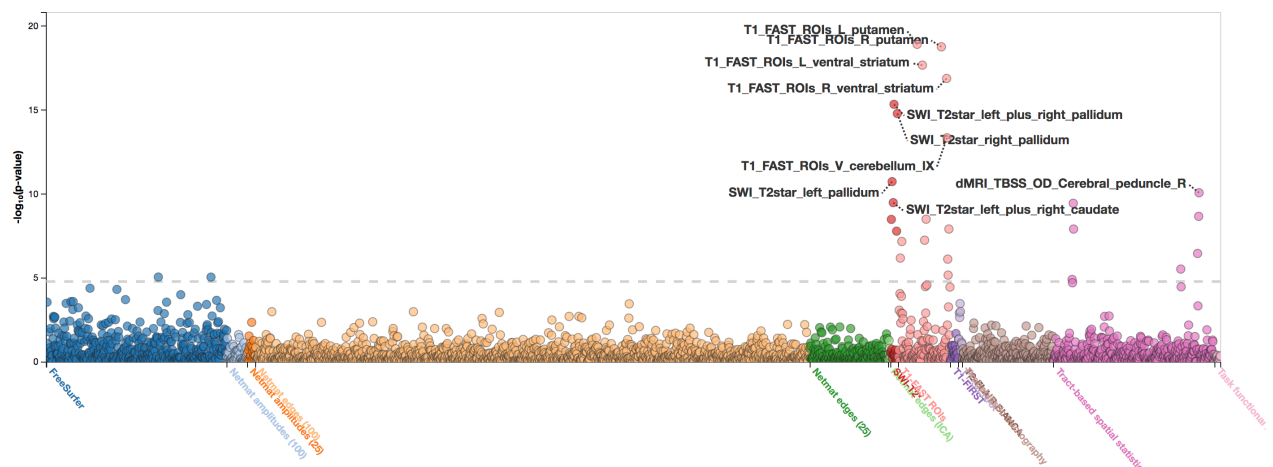

**c. Sleep duration (rs330088) – *PPP1R3B***

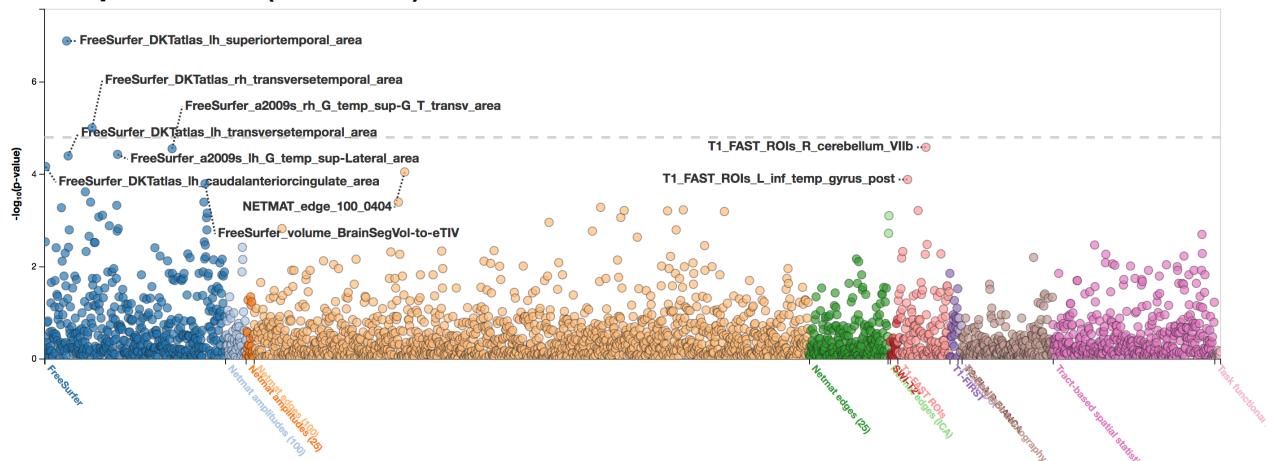

**d. Sleep duration (rs11602180) – PTPRJ**

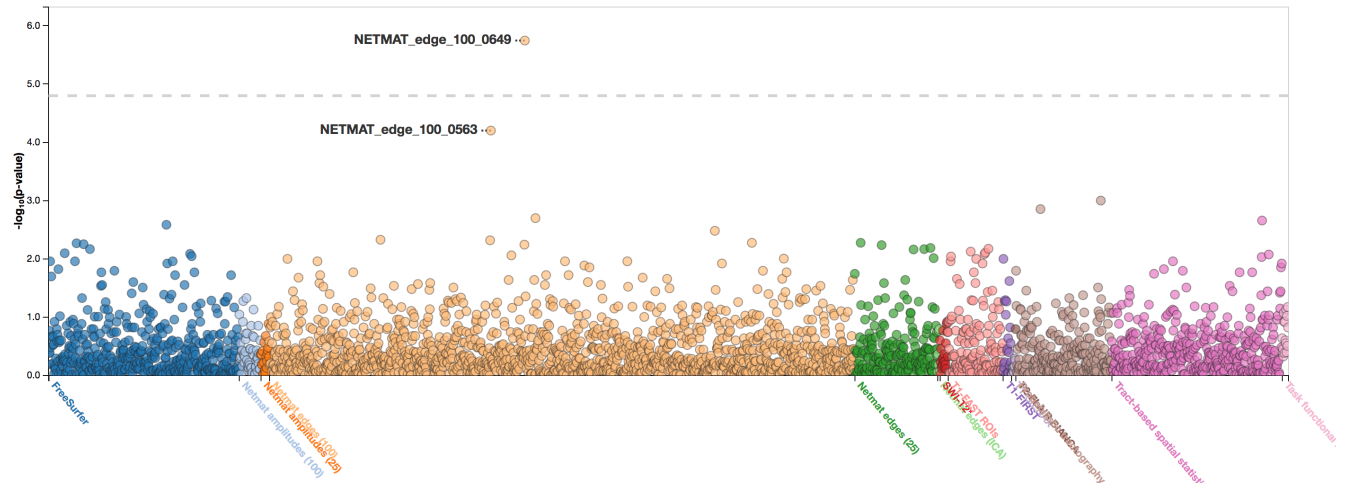

**e. Sleep duration (rs9345234) – EPHA7**

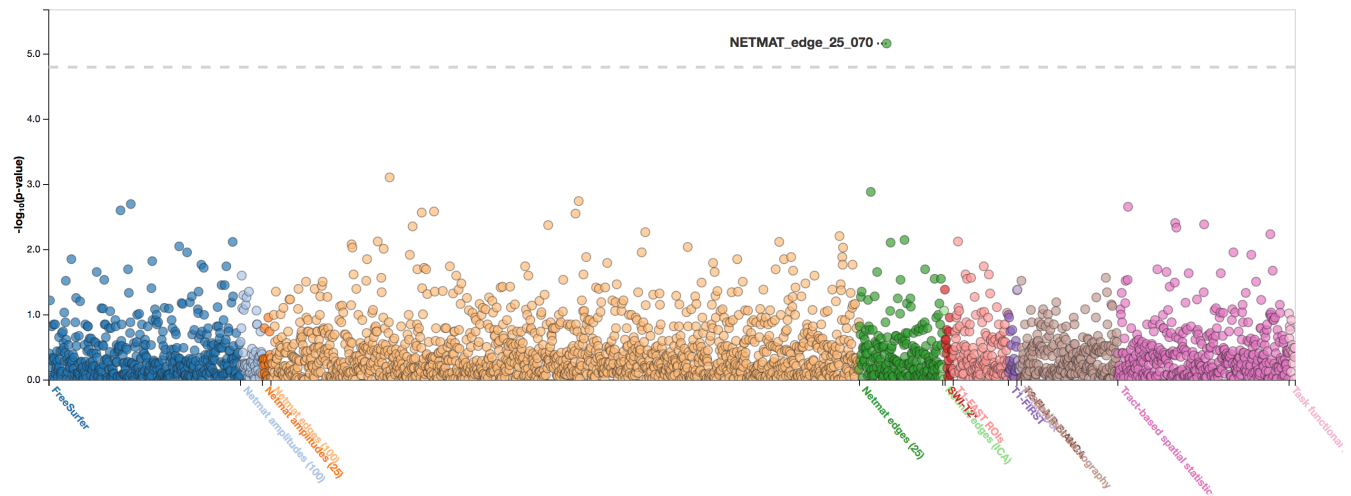

**f. Sleep duration (rs174560) – FADS1/FADS2**

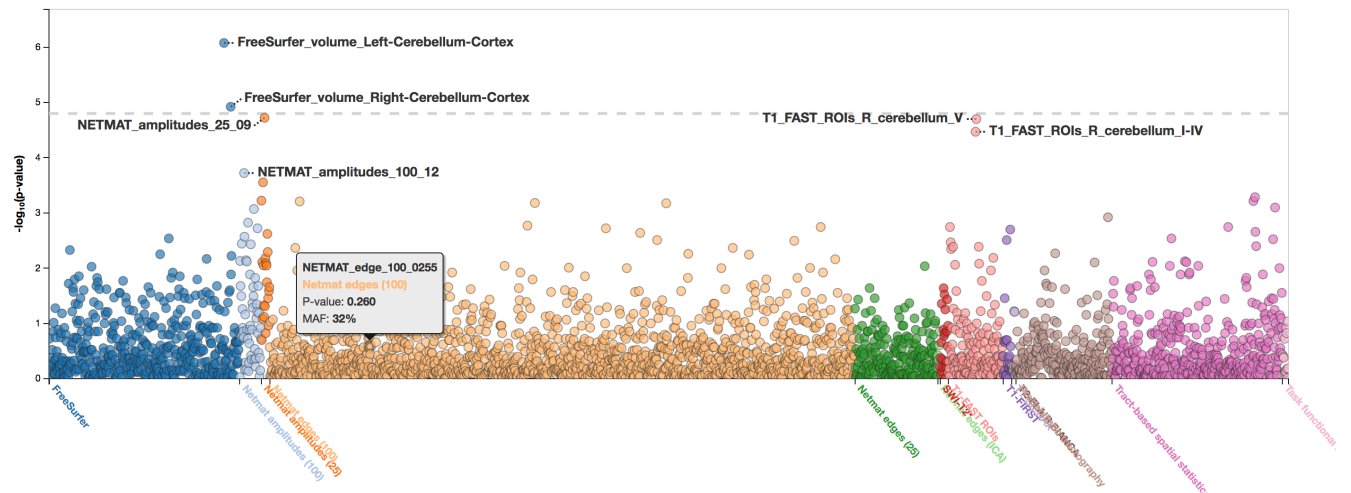

### g. Sleep duration (rs12611523) – SPOPL

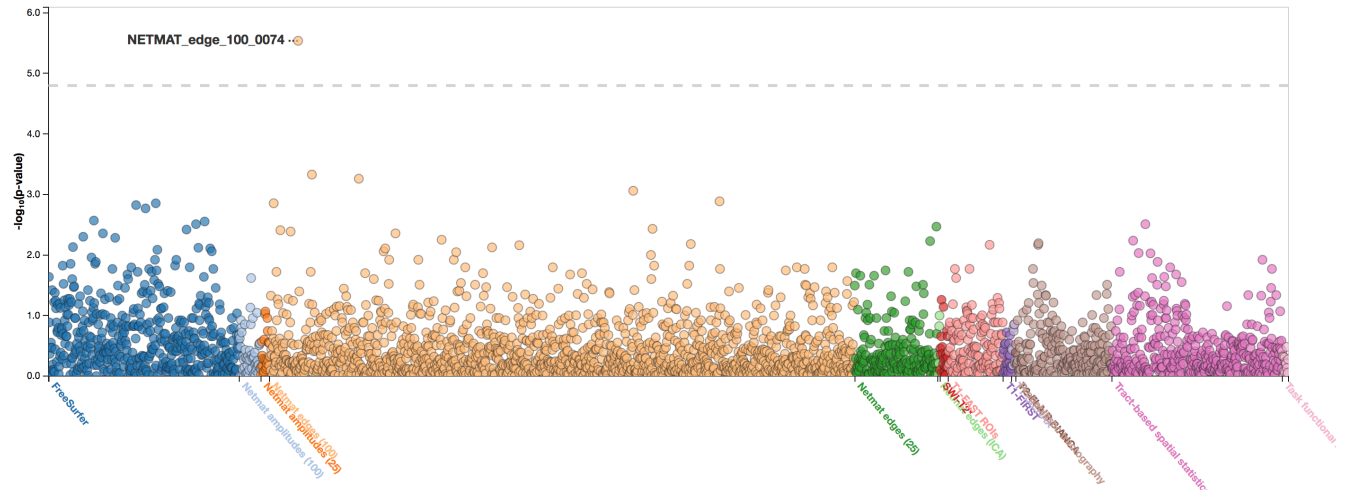

### h. Short sleep (rs2863957) – PAX8

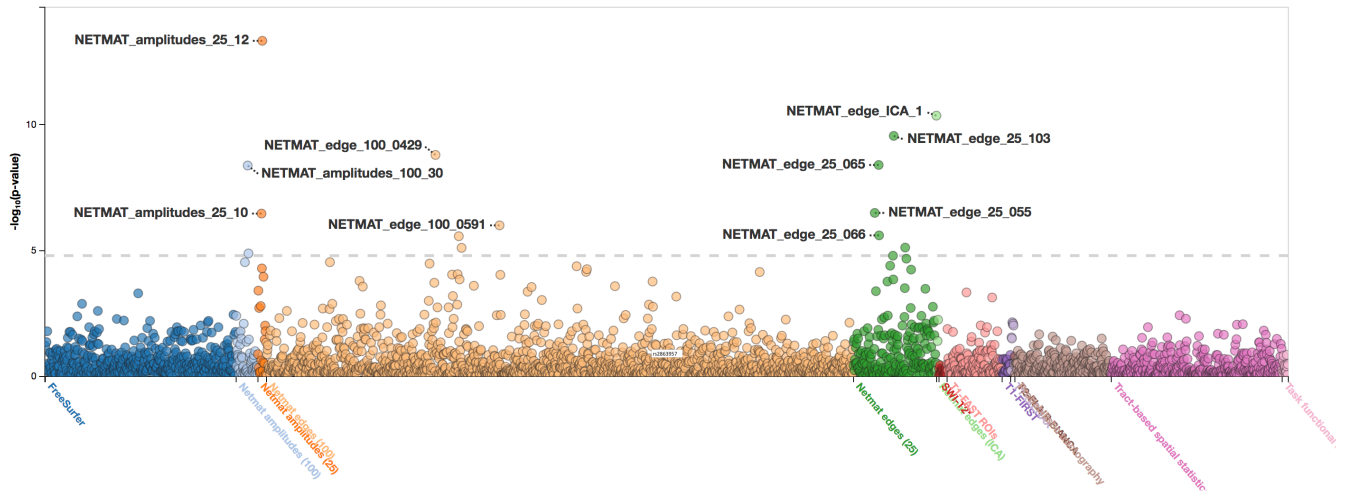

### i. Short sleep (rs13107325) – SLC39A8

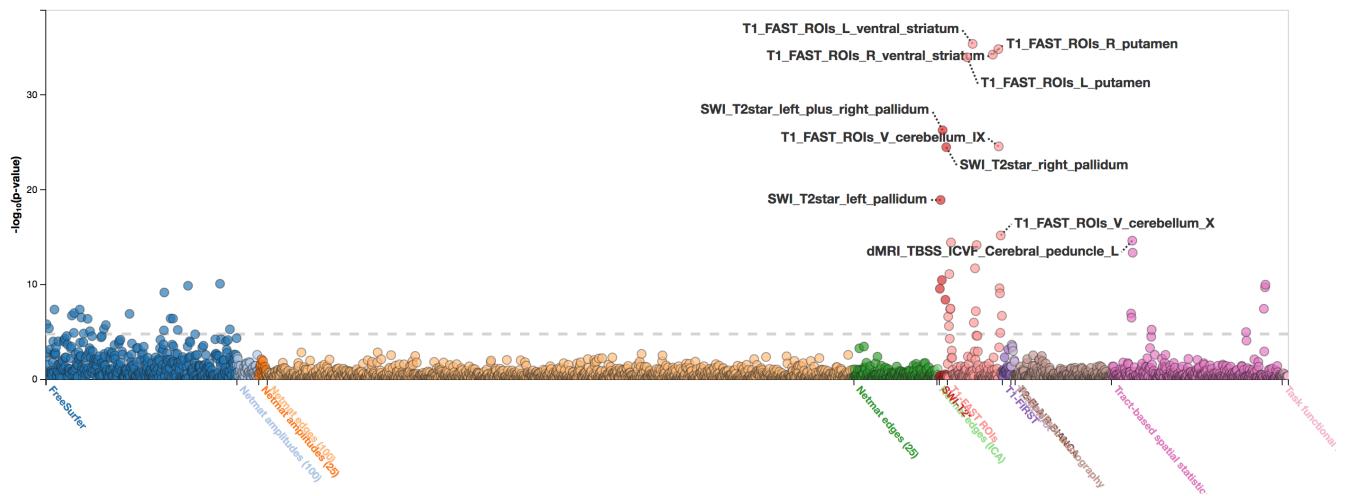

**j. Short sleep (rs2820313) – LMOD1**

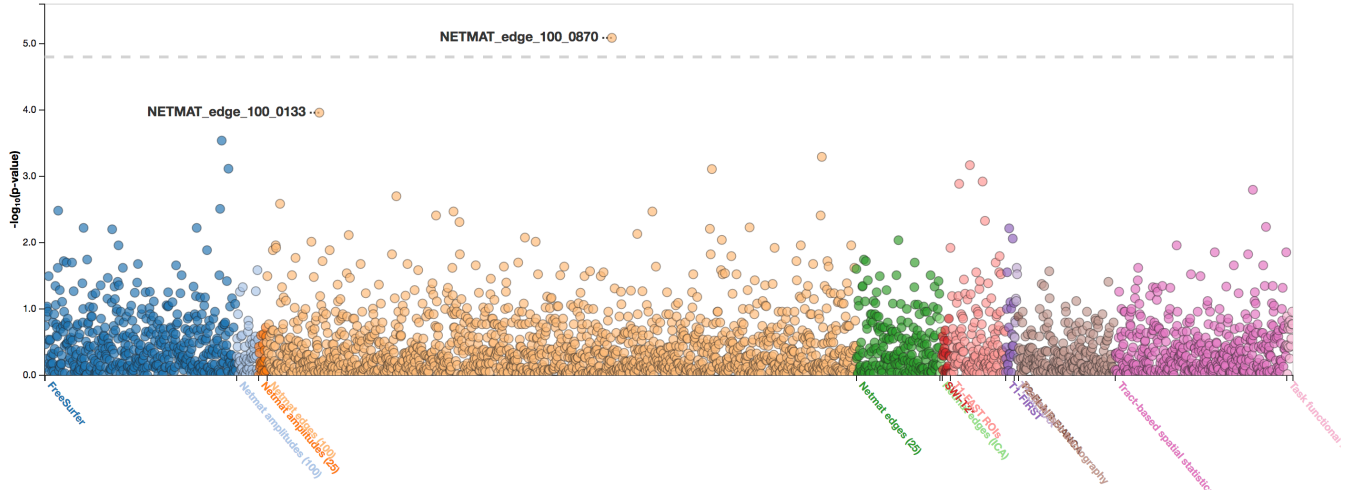

**k. Short sleep (rs2186122) – PDE4B**

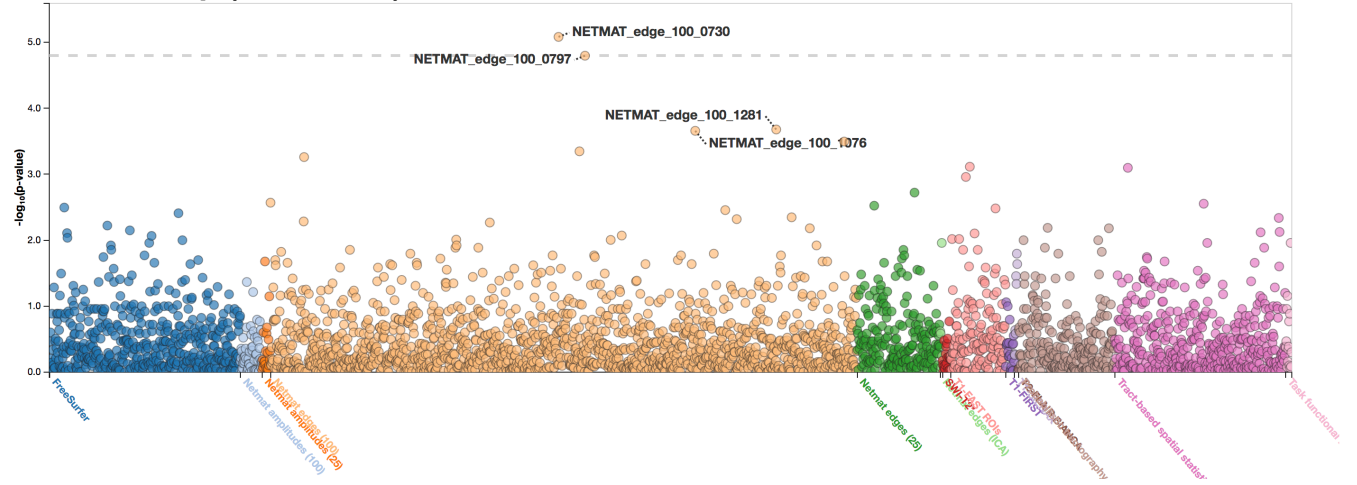

**l. Short sleep (rs2014830) – RBM5**

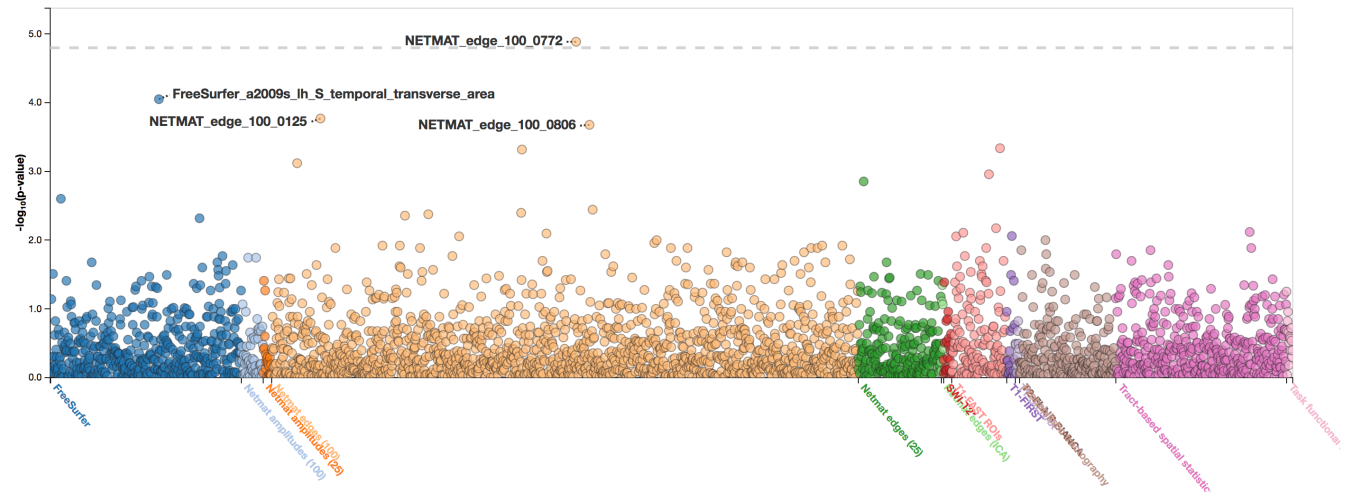

**m. Long sleep (rs6737318) – PAX8**

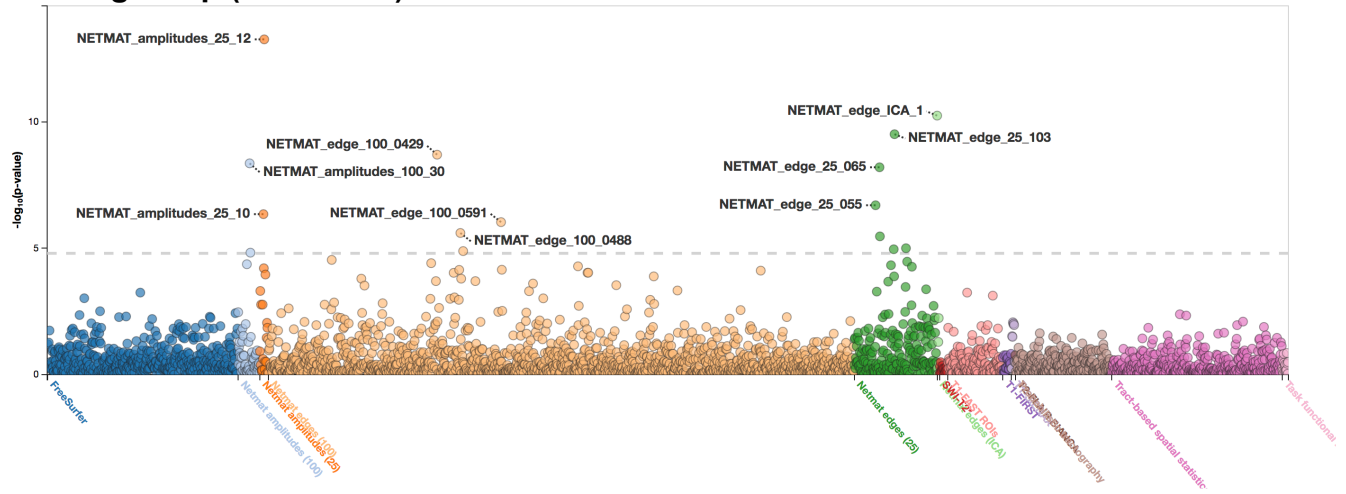

**n. Long sleep (rs7534398) – CAMTA1**

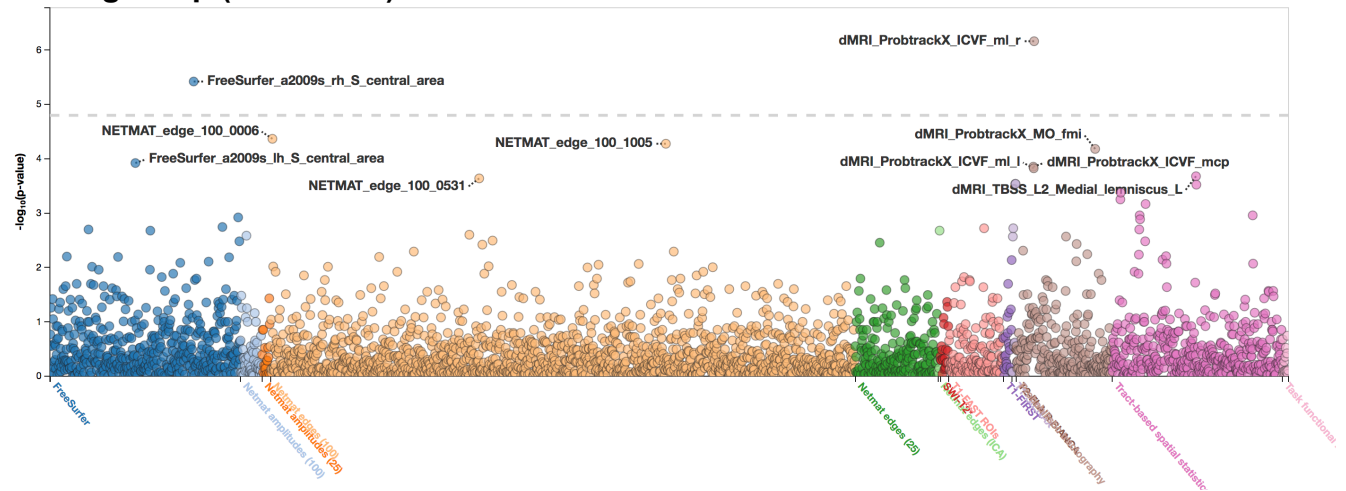

**o. Long sleep (rs10899257) – GUCY2E**

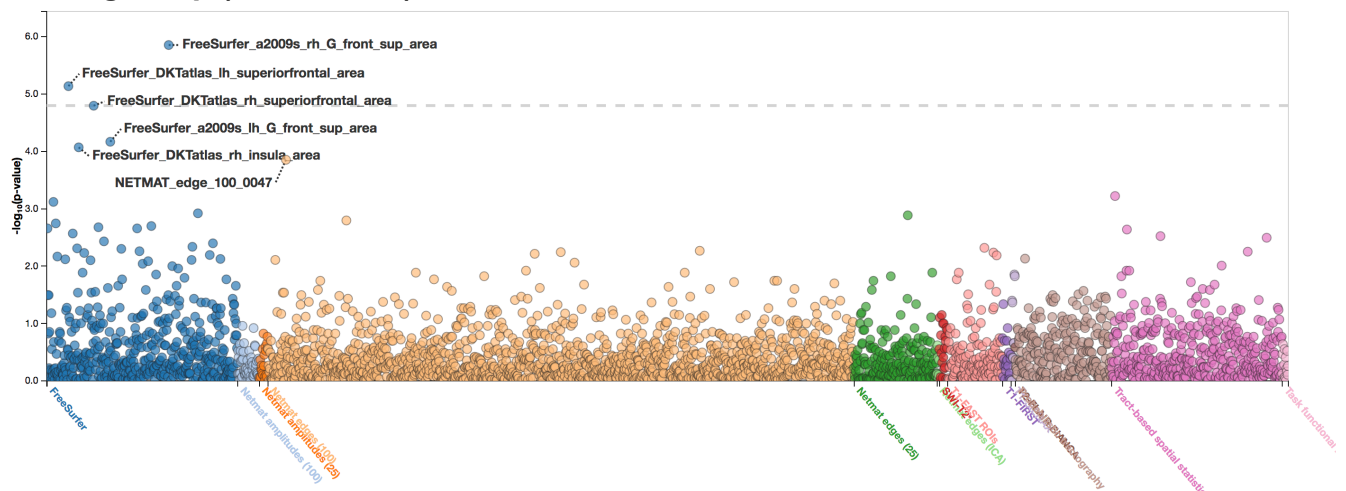

**Supplementary Figure 7.** Causal relationship of sleep duration with BMI (GIANT: a,b) or type 2 diabetes (DIAGRAM: c,d). Association between single nucleotide polymorphisms (SNP) associated with sleep duration and outcomes (a,c), and lines identify the slopes of the five methods tested. Forest plot shows the estimate of the effect of genetically increased sleep duration (in minutes) on outcomes (kg/m<sup>2</sup> or log OR; b,d). Forest plots show each SNP with the 95% confidence interval (gray line segment; error bars) of the estimate and the Inverse Variance MR, MR-Egger, and Weighted Median MR results in red. MR results can be found in tabular form in **Supplementary Table 13**.

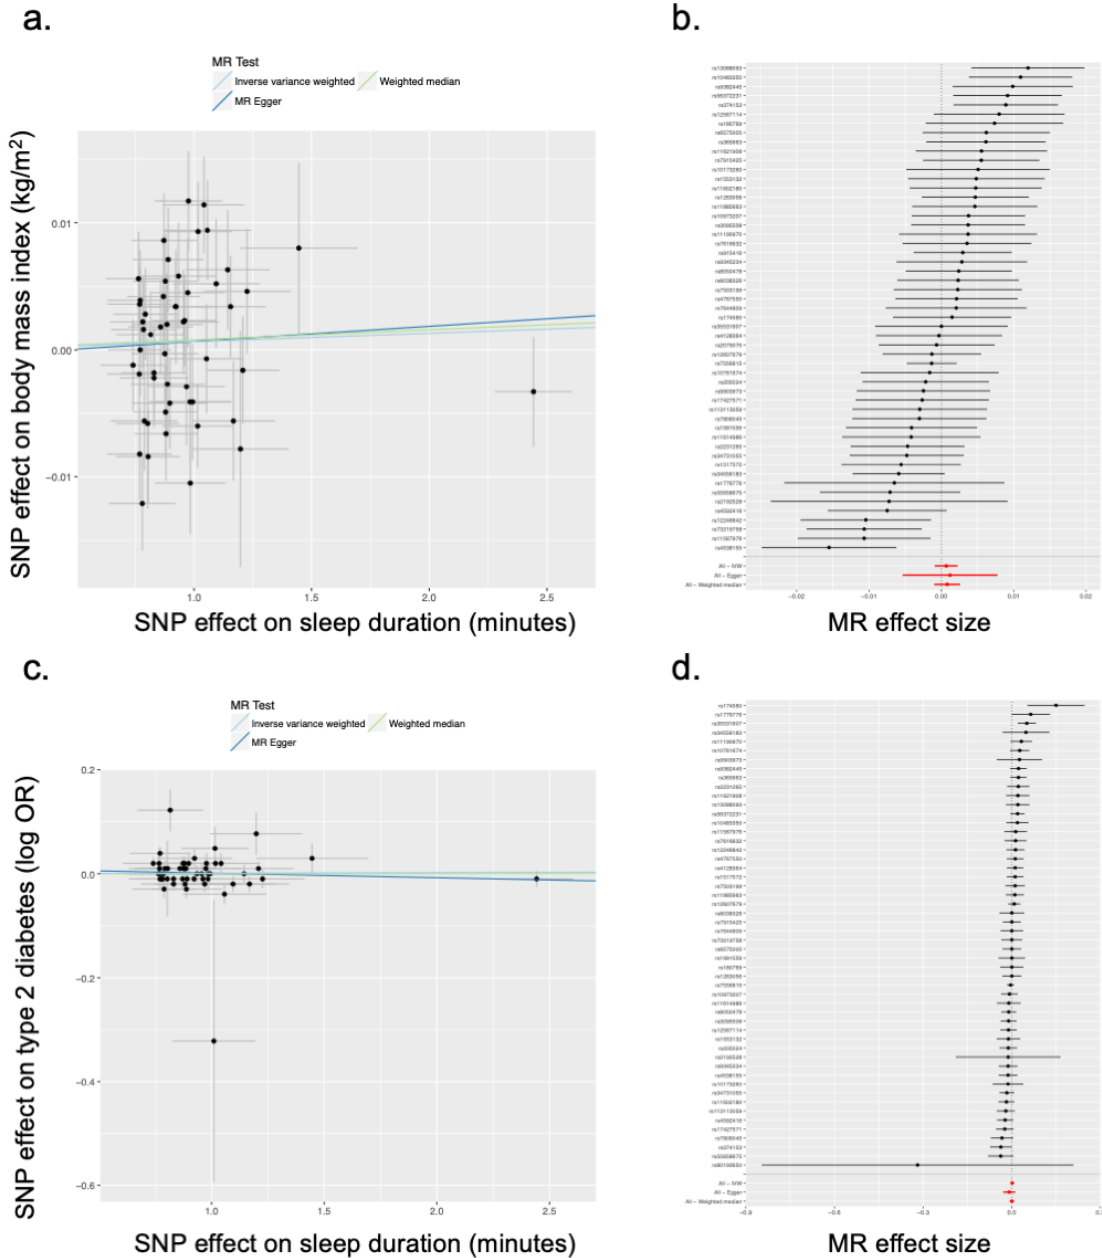

**Supplementary Table 1.** Descriptive table of UK Biobank participants of European ancestry ( $n = 446,118$ ) included in sleep duration genome-wide association study.

| Characteristic                              | Sleep Duration           |                                 |                                                 |                                        | Phenotypic Correlation<br><i>P</i> value |
|---------------------------------------------|--------------------------|---------------------------------|-------------------------------------------------|----------------------------------------|------------------------------------------|
|                                             | All<br>( $N = 446,118$ ) | Short (7h)<br>( $N = 106,192$ ) | Normal ( $\geq 7h, < 9h$ )<br>( $N = 305,742$ ) | Long ( $\geq 9h$ )<br>( $N = 34,184$ ) |                                          |
| <b>Sex (female), %</b>                      | 54.1                     | 53.1                            | 54.2                                            | 56.1                                   | < 2.2e-16                                |
| <b>Age, y</b>                               | 57.3 (8.0)               | 57.2 (7.8)                      | 57.1 (8.1)                                      | 59.3 (7.9)                             | < 2.2e-16                                |
| <b>Sleep duration, hours</b>                | 7.2 (1.1)                | 5.7 (0.5)                       | 7.4 (0.5)                                       | 9.3 (0.7)                              | N/A                                      |
| <b>BMI, kg/m<sup>2</sup></b>                | 27.4 (4.7)               | 27.9 (5.1)                      | 27.1 (4.6)                                      | 28.1 (5.1)                             | < 2.2e-16                                |
| <b>Coffee intake, cups/day</b>              | 2.2 (2.0)                | 2.3 (2.2)                       | 2.1 (1.9)                                       | 2.1 (2.1)                              | < 2.2e-16                                |
| <b>Tea intake, cups/day</b>                 | 3.5 (2.7)                | 3.6 (2.9)                       | 3.5 (2.6)                                       | 3.7 (2.9)                              | 5.36E-05                                 |
| <b>Alcohol intake, g/day</b>                | 2.9 (1.5)                | 3.0 (1.5)                       | 2.8 (1.4)                                       | 3.0 (1.6)                              | < 2.2e-16                                |
| <b>Townsend Deprivation Index</b>           | -2.3 (-3.1 to 0.2)       | -2.0 (-3.5 to 0.8)              | -2.4 (-3.8 to -0.1)                             | -2.1 (-3.6 to 0.6)                     | < 2.2e-16                                |
| <b>Sleep apnea, %</b>                       | 1.2                      | 1.7                             | 1.0                                             | 1.7                                    | < 2.2e-16                                |
| <b>Insomnia symptoms, %</b>                 | 28.0                     | 51.0                            | 20.7                                            | 21.2                                   | < 2.2e-16                                |
| <b>Physical activity, MET-h/week</b>        | 28.3 (12.9 to 58.2)      | 28.3 (12.2 to 61.7)             | 28.4 (13.2 to 57.1)                             | 26.6 (11.6 to 56.0)                    | 1.98E-03                                 |
| <b>Nap during day, %</b>                    |                          |                                 |                                                 |                                        | < 2.2e-16                                |
| Never/Rarely                                | 56.7                     | 58.8                            | 58.2                                            | 35.9                                   |                                          |
| Sometimes                                   | 38.1                     | 36.9                            | 37.4                                            | 47.5                                   |                                          |
| Always                                      | 5.2                      | 4.2                             | 4.3                                             | 16.5                                   |                                          |
| <b>Smoking Status, %</b>                    |                          |                                 |                                                 |                                        | < 2.2e-16                                |
| Never/Rarely                                | 53.9                     | 51.4                            | 55.3                                            | 50.0                                   |                                          |
| Current                                     | 10.3                     | 12.5                            | 9.3                                             | 11.6                                   |                                          |
| Former                                      | 35.5                     | 35.7                            | 35.1                                            | 38.0                                   |                                          |
| <b>Employment Status, %</b>                 |                          |                                 |                                                 |                                        | < 2.2e-16                                |
| Employed                                    | 57.3                     | 60.0                            | 59.1                                            | 33.2                                   |                                          |
| Retired                                     | 34.3                     | 30.3                            | 33.8                                            | 52.1                                   |                                          |
| Other                                       | 8.4                      | 9.7                             | 7.1                                             | 14.3                                   |                                          |
| <b>Menopause status, % yes</b>              | 33.2                     | 34.4                            | 32.5                                            | 35.4                                   | 3.68E-03                                 |
| <b>Chronic and psychiatric disorders, %</b> | 16.1                     | 18.1                            | 14.3                                            | 24.9                                   | < 2.2e-16                                |
| <b>Antidepressant medication, %</b>         | 7.1                      | 7.6                             | 5.9                                             | 15.8                                   | < 2.2e-16                                |
| <b>Antipsychotic medication, %</b>          | 0.5                      | 0.5                             | 0.4                                             | 1.8                                    | < 2.2e-16                                |
| <b>Shift Worker, %</b>                      |                          |                                 |                                                 |                                        | < 2.2e-16                                |
| Never/Rarely                                | 47.9                     | 47.4                            | 50.4                                            | 26.8                                   |                                          |
| Sometimes                                   | 4.1                      | 5.1                             | 3.9                                             | 2.5                                    |                                          |
| Usually                                     | 1.1                      | 1.4                             | 1.0                                             | 0.8                                    |                                          |
| Always                                      | 4.2                      | 6.0                             | 3.6                                             | 3.1                                    |                                          |

Mean  $\pm$  standard deviation or N(%) or Median [IQR]. P-values derived from chi-squared or anova test. A greater Townsend index score implies a greater degree of deprivation.



**Supplementary Table 2.** Conditional analyses for sleep duration in the UK Biobank participants of European ancestry using the approximate conditional and joint association method implemented in GCTA unravels additional independent signals.

| Lead Signal | Chr:position (NCBI Build 37) | Nearest gene(s)                                                                         | Secondary SNP | Chr:position (NCBI Build 37) | Alleles (E/A) | EAF   | Unadjusted for lead signal |          |          | Conditioned on lead signal |          |          |
|-------------|------------------------------|-----------------------------------------------------------------------------------------|---------------|------------------------------|---------------|-------|----------------------------|----------|----------|----------------------------|----------|----------|
|             |                              |                                                                                         |               |                              |               |       | Beta (min)                 | SE (min) | P Value  | Beta (min)                 | SE (min) | P Value  |
| rs75539574  | 2:58871658                   | <i>VRK2</i> ,<br><i>LINC01122</i>                                                       | rs2717076     | 2:58061127                   | T/C           | 0.627 | 1.105                      | 0.140    | 3.10E-15 | 1.038                      | 0.141    | 1.57E-13 |
| rs365663    | 5:1428883                    | <i>SLC6A3</i>                                                                           | rs7718889     | 5:7200526                    | A/T           | 0.630 | 0.768                      | 0.141    | 5.60E-08 | 0.776                      | 0.141    | 3.55E-08 |
| rs7115226   | 11:113408518                 | <i>DRD2</i>                                                                             | rs2075654     | 11:113289066                 | T/C           | 0.158 | 1.092                      | 0.186    | 6.40E-09 | 1.020                      | 0.187    | 4.63E-08 |
| rs1991556   | 17:44083402                  | <i>MAPT</i> , <i>STH</i> ,<br><i>KANSL1</i> ,<br><i>LOC644157</i> ,<br><i>LOC644172</i> | rs9895274     | 17:45539117                  | C/T           | 0.510 | 0.801                      | 0.136    | 4.70E-09 | 0.790                      | 0.136    | 6.43E-09 |

**Abbreviations:** Chr=chromosome, E/A=effect/alternative, position=base pair coordinate hg19, SNP=single nucleotide polymorphism.

**Supplementary Table 3.** Novel loci identified for sleep duration from genome-wide association study ( $P < 5 \times 10^{-8}$ ) for sleep duration with additional exclusions for shift work and prevalent chronic diseases and psychiatric disorders in participants of European ancestry from UK Biobank ( $n = 326,224$ ) and corresponding results from the sleep duration GWAS without these exclusions.

| SNP        | Chr:position<br>(NCBI Build<br>37) | Nearest<br>gene(s)                                                                                                                           | Alleles<br>(E/A) | EAF   | Info | Additional Exclusions |          |                 | Entire UK Biobank |          |          |
|------------|------------------------------------|----------------------------------------------------------------------------------------------------------------------------------------------|------------------|-------|------|-----------------------|----------|-----------------|-------------------|----------|----------|
|            |                                    |                                                                                                                                              |                  |       |      | Beta (min)            | SE (min) | P Value         | Beta (min)        | SE (min) | P Value  |
| rs226063   | 1:44803346                         | <b>ERI3, DMAP1</b>                                                                                                                           | C/T              | 0.298 | 1.00 | 0.929                 | 0.162    | <b>1.10E-08</b> | 0.731             | 0.148    | 9.50E-07 |
| rs57316292 | 3:61792378                         | <b>PTPRG</b>                                                                                                                                 | A/G              | 0.903 | 0.99 | 1.400                 | 0.250    | <b>1.40E-08</b> | 1.159             | 0.230    | 3.40E-07 |
| rs41845    | 7:69025267                         | <b>AUTS2</b>                                                                                                                                 | T/G              | 0.347 | 1.00 | 0.876                 | 0.155    | <b>1.50E-08</b> | 0.725             | 0.143    | 4.20E-07 |
| rs6561715  | 13:53888526                        | -                                                                                                                                            | A/T              | 0.630 | 0.99 | 0.848                 | 0.154    | <b>3.40E-08</b> | 0.754             | 0.141    | 1.10E-07 |
| rs12462757 | 19:50098423                        | <b>PBX4, NCAN,<br/>CILP2, MAU2,<br/>HAPLN4,<br/>NDUFA13,<br/>GMIP,<br/>TM6SF2,<br/>GATAD2A,<br/>ATP13A1,<br/>SUGP1,<br/>TSSK6,<br/>LPAR2</b> | G/A              | 0.833 | 1.00 | 1.088                 | 0.198    | <b>4.10E-08</b> | 0.915             | 0.182    | 4.10E-07 |

Genetic association analysis was performed in related subjects of European ancestry using BOLT-LMM linear mixed models and an additive genetic model adjusted for age, sex, 10 principal components of ancestry, genotyping array and genetic correlation matrix [12]. Bold denotes genome-wide significant signals ( $p < 5 \times 10^{-8}$ ). Genes indicate all genes within the locus of interest; bold genes indicate nearest gene. Beta (SE) estimates are per each additional effect allele.

**Abbreviations:** Chr=chromosome, E/A=effect/alternative alleles, EAF=effect allele frequency, Info=imputation quality score, position=base pair coordinate hg19, SNP=single nucleotide polymorphism.

**Supplementary Table 4.** Genetic correlations between sex-stratified sleep duration GWAS models. Genetic correlation between reported sleep traits are estimated by LDSC.

| Trait 1              | Trait 2                | $r_g$ | SE    | z      | P value   | h2_obs | h2_obs_se | h2_int | h2_int_se | gcov_int | gcov_int_se |
|----------------------|------------------------|-------|-------|--------|-----------|--------|-----------|--------|-----------|----------|-------------|
| Sleep duration (men) | Sleep duration (women) | 0.989 | 0.042 | 23.855 | 9.00E-126 | 0.074  | 0.005     | 1.012  | 0.008     | 0.010    | 0.006       |

**Supplementary Table 5.** Genome-wide association signals ( $P < 5 \times 10^{-8}$ ) for long sleep in participants of European ancestry from UK Biobank ( $n = 34,184$  cases/305,742 controls) and corresponding results from short sleep ( $n = 106,192$  cases/305,742 controls) and sleep duration ( $n = 446,118$ ) GWAS.

| SNP         | Chr:position<br>(NCBI Build<br>37) | Nearest gene(s)                   | Alleles<br>(E/A) | EAF   | Info     | Long Sleep          |                 | Short Sleep         |                 | Sleep Duration |       |                 |
|-------------|------------------------------------|-----------------------------------|------------------|-------|----------|---------------------|-----------------|---------------------|-----------------|----------------|-------|-----------------|
|             |                                    |                                   |                  |       |          | OR [95% CI]         | P Value         | OR [95% CI]         | P Value         | Beta           | SE    | P Value         |
| rs6737318   | 2:114083120                        | <i>PAX8, LOC100130100</i>         | G/A              | 0.222 | 0.99     | 1.079 [1.056-1.103] | <b>3.40E-13</b> | 0.948 [0.934-0.961] | <b>4.70E-18</b> | 2.442          | 0.164 | <b>1.60E-49</b> |
| rs75458655  | 11:118115331                       | <i>MPZL2, JAML, MPZL3</i>         | T/C              | 0.023 | 1.00     | 1.203 [1.136-1.275] | <b>5.40E-12</b> | 0.967 [0.93-1.006]  | 2.10E-01        | 2.064          | 0.455 | 5.00E-06        |
| rs17688916  | 17:43778680                        | <i>CRHR1, KIAA1267, LOC644246</i> | T/A              | 0.796 | 0.96467  | 1.074 [1.048-1.1]   | <b>1.10E-11</b> | 1.003 [0.988-1.018] | 8.90E-01        | 0.903          | 0.172 | 1.30E-07        |
| rs17817288  | 16:53807764                        | <i>FTO, RPGRIP1L</i>              | A/G              | 0.518 | 1.00     | 1.04 [1.021-1.059]  | <b>8.90E-09</b> | 0.992 [0.981-1.004] | 9.50E-02        | 0.829          | 0.136 | <b>1.20E-09</b> |
| rs549961083 | 5:58184093                         | <i>RAB3C, PDE4D</i>               | T/C              | 0.001 | 0.868466 | 1.705 [1.357-2.143] | <b>9.60E-09</b> | 1.211 [1.025-1.43]  | 4.80E-04        | 49.74          | 8.16  | 5.00E-01        |
| rs3751046   | 11:122828342                       | <i>BSX, C11orf63</i>              | G/A              | 0.147 | 0.99     | 1.072 [1.044-1.099] | <b>2.00E-08</b> | 0.975 [0.96-0.992]  | 2.50E-03        | 1.165          | 0.192 | <b>1.10E-09</b> |
| rs7534398   | 1:7767464                          | <i>CAMTA1, VAMP3, PER3, UTS</i>   | A/T              | 0.201 | 0.99     | 1.048 [1.024-1.072] | <b>2.10E-08</b> | 0.994 [0.98-1.009]  | 3.50E-01        | 0.738          | 0.170 | 1.20E-05        |
| rs10899257  | 11:76415209                        | <i>GUCY2E, LRRC32, TSKU</i>       | A/G              | 0.144 | 1.00     | 1.07 [1.043-1.098]  | <b>4.60E-08</b> | 1.011 [0.995-1.028] | 1.80E-01        | 0.419          | 0.193 | 2.70E-02        |

Genetic association analysis was performed in related subjects of European ancestry using BOLT-LMM linear mixed models and an additive genetic model adjusted for age, sex, 10 principal components of ancestry, genotyping array and genetic correlation matrix [12]. OR [95% CI] estimates for short/long sleep are from adjusted PLINK logistic regression analyses. OR [95% CI] or Beta (SE) estimates are per each additional effect allele. Bold denotes genome-wide significant signals ( $p < 5 \times 10^{-8}$ ). Genes indicate all genes within the locus of interest; bold genes indicate nearest gene.

**Abbreviations:** Chr=chromosome, E/A=effect/alternative alleles, EAF=effect allele frequency, Info=imputation quality score, position=base pair coordinate hg19, SNP=single nucleotide polymorphism.

**Supplementary Table 6.** Sensitivity analysis for genome-wide significant long sleep loci ( $P < 5 \times 10^{-8}$ ) in participants of European ancestry from UK Biobank ( $n = 34,184$  cases/ $305,742$  controls), adjusting for known risk factors.

| SNP         | Chr:position<br>(NCBI Build<br>37) | Baseline Adjustment |          | BMI Adjustment      |          | Caffeine Adjustment |          | Additional Lifestyle and<br>Clinical Adjustments |          |
|-------------|------------------------------------|---------------------|----------|---------------------|----------|---------------------|----------|--------------------------------------------------|----------|
|             |                                    | OR [95% CI]         | P Value  | OR [95% CI]         | P Value  | OR [95% CI]         | P Value  | OR [95% CI]                                      | P Value  |
| rs6737318   | 2:114083120                        | 1.079 [1.056-1.103] | 3.40E-13 | 1.08 [1.056-1.104]  | 2.30E-13 | 1.079 [1.055-1.103] | 3.80E-13 | 1.082 [1.058-1.106]                              | 1.10E-13 |
| rs75458655  | 11:118115331                       | 1.203 [1.136-1.275] | 5.40E-12 | 1.204 [1.136-1.276] | 5.30E-12 | 1.203 [1.135-1.274] | 6.80E-12 | 1.201 [1.132-1.274]                              | 3.10E-12 |
| rs17688916  | 17:43778680                        | 1.074 [1.048-1.1]   | 1.10E-11 | 1.074 [1.048-1.1]   | 9.50E-12 | 1.074 [1.048-1.1]   | 9.80E-12 | 1.059 [1.033-1.085]                              | 1.50E-07 |
| rs17817288  | 16:53807764                        | 1.04 [1.021-1.059]  | 8.90E-09 | 1.053 [1.033-1.072] | 4.90E-13 | 1.039 [1.02-1.059]  | 1.50E-08 | 1.047 [1.028-1.067]                              | 7.10E-08 |
| rs549961083 | 5:58184093                         | 1.705 [1.357-2.143] | 9.60E-09 | 1.708 [1.358-2.148] | 8.30E-09 | 1.707 [1.358-2.145] | 8.80E-09 | 1.78 [1.409-2.248]                               | 7.60E-09 |
| rs3751046   | 11:122828342                       | 1.072 [1.044-1.099] | 2.00E-08 | 1.073 [1.046-1.101] | 1.10E-08 | 1.071 [1.044-1.099] | 2.60E-08 | 1.074 [1.046-1.103]                              | 2.30E-08 |
| rs7534398   | 1:7767464                          | 1.048 [1.024-1.072] | 2.10E-08 | 1.047 [1.023-1.071] | 4.20E-08 | 1.048 [1.024-1.072] | 2.30E-08 | 1.05 [1.026-1.075]                               | 1.10E-08 |
| rs10899257  | 11:76415209                        | 1.07 [1.043-1.098]  | 4.60E-08 | 1.071 [1.044-1.099] | 3.40E-08 | 1.07 [1.043-1.098]  | 4.30E-08 | 1.072 [1.044-1.1]                                | 3.00E-08 |

Genetic association analysis was performed in related subjects of European ancestry using BOLT-LMM linear mixed models and an additive genetic model adjusted for age, sex, 10 principal components of ancestry, genotyping array and genetic correlation matrix [j]2] as baseline and additional covariates as indicated for each analysis. OR [95% CI] estimates for short/long sleep are from adjusted PLINK logistic regression analyses. Additional lifestyle and clinical adjustments included BMI, day naps, Townsend index, smoking, alcohol intake, menopause status, employment status, and sleep apnea in addition to baseline adjustments. For further details on sensitivity variables, see methods. All analyses performed in subjects with non-missing covariates. OR [95% CI] estimates are per each additional effect allele. **Abbreviations:** BMI=body mass index, CI=confidence interval, Chr=chromosome, OR=odds ratio, SNP=single nucleotide polymorphism.

**Supplementary Table 7.** Low genetic correlation between adult (UK Biobank and CHARGE) and childhood/adolescent (EAGLE) genome-wide association studies for sleep duration. Genetic correlation between reported sleep traits are measured by LDSC.

| <b>Study 1</b> | <b>Study 2</b> | <b><math>r_g</math></b> | <b>SE</b> | <b>z</b> | <b><i>P</i> value</b> | <b>h2_obs</b> | <b>h2_obs_se</b> | <b>h2_int</b> | <b>h2_int_se</b> | <b>gcov_int</b> | <b>gcov_int_se</b> |
|----------------|----------------|-------------------------|-----------|----------|-----------------------|---------------|------------------|---------------|------------------|-----------------|--------------------|
| UK Biobank     | CHARGE         | 1.000                   | 0.123     | 8.152    | 3.59E-16              | 0.037         | 0.009            | 1.011         | 0.006            | 0.000           | 0.005              |
| UK Biobank     | EAGLE          | 0.098                   | 0.076     | 1.293    | 0.20                  | 0.132         | 0.044            | 0.984         | 0.007            | 0.003           | 0.005              |
| CHARGE         | EAGLE          | 0.016                   | 0.180     | 0.090    | 0.93                  | 0.130         | 0.045            | 0.985         | 0.007            | 0.001           | 0.004              |

**Supplementary Table 8.** Descriptive table of UK Biobank participants of European ancestry who had completed up to 7 days of wrist-worn accelerometry (n =85,499).

| Characteristic                                                                  | Sleep Duration    |                                 |                                           |                           |
|---------------------------------------------------------------------------------|-------------------|---------------------------------|-------------------------------------------|---------------------------|
|                                                                                 | All<br>(N=85,499) | Short<br>(≤ 6.5h)<br>(N=13,760) | Normal<br>(>6.5h,<br>≤8.5h)<br>(N=66,110) | Long (>8.5h)<br>(N=5,629) |
| <b>Sex (female), %</b>                                                          | 56.2 (49.6)       | 44.1 (49.7)                     | 58.5 (49.3)                               | 59.9 (49.0)               |
| <b>Age, y</b>                                                                   | 62.5 (7.8)        | 61.8 (8.0)                      | 62.5 (7.8)                                | 64.2 (7.4)                |
| <b>BMI, kg/m<sup>2</sup></b>                                                    | 26.7 (4.5)        | 27.5 (4.9)                      | 26.5 (4.4)                                | 26.5 (4.5)                |
| <b>Sleep duration, hours</b>                                                    | 7.30 (0.86)       | 5.93 (0.56)                     | 7.45 (0.51)                               | 8.85 (0.33)               |
| <b>Sleep duration standard deviation, hours</b>                                 | 0.93 (0.57)       | 1.30 (0.85)                     | 0.86 (0.47)                               | 0.83 (.42)                |
| <b>Sleep efficiency, %</b>                                                      | 76.18 (7.18)      | 69.13 (9.05)                    | 77.17 (5.84)                              | 81.84 (4.01)              |
| <b>Number of sleep bouts, <i>n</i></b>                                          | 17.25 (3.59)      | 16.37 (3.81)                    | 17.38 (3.51)                              | 17.89 (3.57)              |
| <b>Midpoint of 5-hour daily period of minimum activity (L5 timing), HH:MM</b>   | 3:19 (1:06)       | 3:22 (1:16)                     | 3:19 (1:01)                               | 3:19 (1:06)               |
| <b>Midpoint of 10-hour daily period of maximum activity (M10 timing), HH:MM</b> | 13:41 (1:13)      | 13:43 (1:31)                    | 13:41 (1:09)                              | 13:50 (1:05)              |
| <b>Daytime Inactivity Duration, hours</b>                                       | 0.97 (0.68)       | 0.82 (0.60)                     | 0.94 (0.63)                               | 1.63 (0.95)               |
| <b>Sleep Midpoint, HH:MM</b>                                                    | 2:59 (0:45)       | 3:01 (1:07)                     | 3:00 (0:51)                               | 2:49 (0:56)               |

**Abbreviations:** SD=standard deviation, BMI=body mass index.

**Supplementary Table 9.** MAGMA pathway-based enrichment analysis for sleep traits based on MAGMA gene-sets. Top 10 of 10,891 pathways are shown. Significant pathways with  $P < 4.59 \times 10^{-06}$  for 10,891 tested pathways are bolded.

| Trait          | Gene Set                                                                           | N genes   | Beta        | Beta STD      | SE           | P Value         | P <sub>bon</sub> |
|----------------|------------------------------------------------------------------------------------|-----------|-------------|---------------|--------------|-----------------|------------------|
| Sleep Duration | <b>GO bp:go striatum development</b>                                               | <b>15</b> | <b>1.55</b> | <b>0.0443</b> | <b>0.307</b> | <b>2.35E-07</b> | <b>0.0026</b>    |
|                | <b>GO bp:go mechanosensory behavior</b>                                            | <b>12</b> | <b>1.54</b> | <b>0.0393</b> | <b>0.313</b> | <b>4.81E-07</b> | <b>0.0052</b>    |
|                | <b>GO mf:go dopamine binding</b>                                                   | <b>10</b> | <b>1.61</b> | <b>0.0376</b> | <b>0.334</b> | <b>7.48E-07</b> | <b>0.0081</b>    |
|                | <b>GO bp:go subpallium development</b>                                             | <b>21</b> | <b>1.14</b> | <b>0.0387</b> | <b>0.257</b> | <b>4.41E-06</b> | <b>0.048</b>     |
|                | GO bp:go synaptic signaling                                                        | 404       | 0.221       | 0.0325        | 0.0539       | 2.08E-05        | 0.23             |
|                | Curated gene sets:ivanova hematopoiesis early progenitor                           | 507       | 0.186       | 0.0305        | 0.0468       | 3.54E-05        | 0.39             |
|                | GO bp:go response to auditory stimulus                                             | 23        | 0.936       | 0.0332        | 0.239        | 4.61E-05        | 0.50             |
|                | GO bp:go adenylate cyclase activating g protein coupled receptor signaling pathway | 71        | 0.491       | 0.0305        | 0.127        | 5.90E-05        | 0.64             |
|                | GO cc:go somatodendritic compartment                                               | 621       | 0.169       | 0.0305        | 0.0441       | 6.49E-05        | 0.71             |
|                | GO cc:go neuron projection                                                         | 900       | 0.141       | 0.0305        | 0.0369       | 6.66E-05        | 0.72             |
| Short Sleep    | Curated gene sets:ikedamir1 targets dn                                             | 7         | 1.6         | 0.0313        | 0.393        | 2.34E-05        | 0.25             |
|                | Curated gene sets:benporathoct4 targets                                            | 275       | 0.235       | 0.0286        | 0.0607       | 5.30E-05        | 0.58             |
|                | GO bp:go regulation of potassium ion transport                                     | 81        | 0.443       | 0.0294        | 0.114        | 5.38E-05        | 0.59             |
|                | Curated gene sets:kegg glycolysis gluconeogenesis                                  | 57        | 0.0421      | 0.00235       | 0.133        | 0.37544         | 1                |
|                | Curated gene sets:kegg citrate cycle tca cycle                                     | 29        | 0.255       | 0.0102        | 0.176        | 0.07381         | 1                |
|                | Curated gene sets:kegg pentose phosphate pathway                                   | 23        | 0.0573      | 0.00203       | 0.188        | 0.38029         | 1                |
|                | Curated gene sets:kegg pentose and glucuronate interconversions                    | 29        | 0.198       | 0.00789       | 0.238        | 0.20214         | 1                |
|                | Curated gene sets:kegg fructose and mannose metabolism                             | 32        | -0.173      | -0.00723      | 0.163        | 0.85546         | 1                |
|                | Curated gene sets:kegg galactose metabolism                                        | 26        | 0.116       | 0.00435       | 0.193        | 0.27453         | 1                |
|                | Curated gene sets:kegg ascorbate and aldarate metabolism                           | 26        | -0.288      | -0.0108       | 0.267        | 0.85941         | 1                |
| Long Sleep     | <b>GO bp:go catecholamine metabolic process</b>                                    | <b>36</b> | <b>0.69</b> | <b>0.0306</b> | <b>0.146</b> | <b>1.20E-06</b> | <b>0.013</b>     |
|                | <b>GO bp:go catechol containing compound metabolic process</b>                     | <b>36</b> | <b>0.69</b> | <b>0.0306</b> | <b>0.146</b> | <b>1.20E-06</b> | <b>0.013</b>     |
|                | GO bp:go catecholamine biosynthetic process                                        | 17        | 0.92        | 0.028         | 0.226        | 2.30E-05        | 0.25             |
|                | GO bp:go catechol containing compound biosynthetic process                         | 17        | 0.92        | 0.028         | 0.226        | 2.30E-05        | 0.25             |
|                | GO bp:go dopamine metabolic process                                                | 20        | 0.773       | 0.0255        | 0.191        | 2.61E-05        | 0.28             |
|                | GO bp:go phenol containing compound biosynthetic process                           | 31        | 0.641       | 0.0263        | 0.165        | 5.10E-05        | 0.56             |
|                | Curated gene sets:reactome microrna mirna biogenesis                               | 22        | 0.788       | 0.0273        | 0.206        | 6.50E-05        | 0.71             |
|                | Curated gene sets:kurokawaliver cancer chemotherapy dn                             | 39        | 0.508       | 0.0234        | 0.136        | 8.87E-05        | 0.97             |
|                | Curated gene sets:kegg glycolysis gluconeogenesis                                  | 57        | 0.00534     | 0.000298      | 0.122        | 0.48255         | 1                |
|                | Curated gene sets:kegg citrate cycle tca cycle                                     | 29        | 0.0386      | 0.00153       | 0.162        | 0.40604         | 1                |



**Supplementary Table 10.** Pascal pathway-based enrichment test for sleep traits using Pascal (gene-set enrichment analysis using 1,077 pathways from KEGG, REACTOME, BIOCARTA databases). Top 10 of 1,077 pathways are shown. Significant pathways with  $P < 4.64 \times 10^{-05}$  for 1,077 tested pathways are bolded.

| Trait          | Name                                                                                            | chi2Pvalue      | empPvalue       | $P_{bon}$       |
|----------------|-------------------------------------------------------------------------------------------------|-----------------|-----------------|-----------------|
| Sleep Duration | <b>KEGG LONG TERM DEPRESSION</b>                                                                | <b>1.66E-06</b> | <b>1.00E-06</b> | <b>1.08E-03</b> |
|                | <b>REACTOME NEURONAL SYSTEM</b>                                                                 | <b>6.80E-07</b> | <b>1.60E-06</b> | <b>1.72E-03</b> |
|                | <b>REACTOME TRANSMISSION ACROSS CHEMICAL SYNAPSES</b>                                           | <b>4.12E-06</b> | <b>5.20E-06</b> | <b>5.60E-03</b> |
|                | KEGG MAPK SIGNALING PATHWAY                                                                     | 2.36E-05        | 1.02E-04        | 1.10E-01        |
|                | KEGG GAP JUNCTION                                                                               | 1.34E-04        | 1.30E-04        | 1.40E-01        |
|                | REACTOME HEMOSTASIS                                                                             | 4.13E-04        | 5.20E-04        | 5.60E-01        |
|                | REACTOME SIGNALING BY FGFR IN DISEASE                                                           | 2.51E-04        | 5.57E-04        | 6.00E-01        |
|                | REACTOME SIGNALING BY FGFR                                                                      | 4.42E-04        | 7.10E-04        | 7.65E-01        |
|                | REACTOME MEIOTIC SYNAPSES                                                                       | 1.01E-03        | 9.00E-04        | 9.69E-01        |
|                | REACTOME PLC BETA MEDIATED EVENTS                                                               | 9.76E-04        | 1.06E-03        | 1.00            |
| Short Sleep    | <b>REACTOME DEVELOPMENTAL BIOLOGY</b>                                                           | <b>3.17E-05</b> | <b>2.03E-05</b> | <b>2.19E-02</b> |
|                | <b>KEGG LONG TERM DEPRESSION</b>                                                                | <b>1.29E-05</b> | <b>2.18E-05</b> | <b>2.35E-02</b> |
|                | <b>KEGG MAPK SIGNALING PATHWAY</b>                                                              | <b>1.18E-05</b> | <b>2.42E-05</b> | <b>2.61E-02</b> |
|                | REACTOME SIGNALING BY FGFR IN DISEASE                                                           | 3.74E-05        | 5.39E-05        | 5.81E-02        |
|                | REACTOME SIGNALING BY FGFR                                                                      | 3.84E-05        | 5.70E-05        | 6.14E-02        |
|                | REACTOME DOWNSTREAM SIGNALING OF ACTIVATED FGFR                                                 | 1.99E-04        | 2.26E-04        | 2.43E-01        |
|                | REACTOME PROLONGED ERK ACTIVATION EVENTS                                                        | 1.32E-04        | 2.34E-04        | 2.52E-01        |
|                | KEGG NON SMALL CELL LUNG CANCER                                                                 | 1.35E-04        | 2.37E-04        | 2.55E-01        |
|                | REACTOME MAP KINASE ACTIVATION IN TLR CASCADE                                                   | 1.91E-04        | 2.61E-04        | 2.81E-01        |
|                | REACTOME FRS2 MEDIATED CASCADE                                                                  | 3.15E-04        | 2.95E-04        | 3.18E-01        |
| Long Sleep     | KEGG LONG TERM DEPRESSION                                                                       | 3.33E-04        | 2.94E-04        | 3.17E-01        |
|                | REACTOME TRAFFICKING OF GLUR2 CONTAINING AMPA RECEPTORS                                         | 6.57E-04        | 7.60E-04        | 8.19E-01        |
|                | REACTOME NEURONAL SYSTEM                                                                        | 4.38E-04        | 7.80E-04        | 8.40E-01        |
|                | BIOCARTA P35ALZHEIMERS PATHWAY                                                                  | 2.85E-03        | 8.90E-04        | 9.59E-01        |
|                | REACTOME TRANSMISSION ACROSS CHEMICAL SYNAPSES                                                  | 7.69E-04        | 1.02E-03        | 1.00            |
|                | BIOCARTA BIOPEPTIDES PATHWAY                                                                    | 5.24E-03        | 1.78E-03        | 1.00            |
|                | KEGG MAPK SIGNALING PATHWAY                                                                     | 2.48E-03        | 3.14E-03        | 1.00            |
|                | REACTOME CASPASE MEDIATED CLEAVAGE OF CYTOSKELETAL PROTEINS                                     | 1.92E-02        | 3.35E-03        | 1.00            |
|                | REACTOME TRAFFICKING OF AMPA RECEPTORS                                                          | 7.39E-03        | 3.55E-03        | 1.00            |
|                | REACTOME NEUROTRANSMITTER RECEPTOR BINDING AND DOWNSTREAM TRANSMISSION IN THE POSTSYNAPTIC CELL | 4.27E-03        | 3.67E-03        | 1.00            |

**Supplementary Table 11.** Enrichment analysis of synaptic sleep-need-index phosphoproteins (SNIPPs) human orthologs in sleep duration GWAS.

| Gene Symbol     | Chromosome | Start     | End       | Sleep Duration |                 | Short Sleep |                 | Long Sleep |                 |
|-----------------|------------|-----------|-----------|----------------|-----------------|-------------|-----------------|------------|-----------------|
|                 |            |           |           | # SNPs         | P value         | # SNPs      | P value         | # SNPs     | P value         |
| <i>SCN1A</i>    | Chr 2      | 166845669 | 167005642 | <b>593</b>     | <b>1.92E-09</b> | 593         | 4.40E-03        | <b>593</b> | <b>2.03E-04</b> |
| <i>PDE4B</i>    | Chr 1      | 66258192  | 66840262  | 1125           | 4.29E-09        | <b>1125</b> | <b>7.91E-08</b> | 1125       | 1.56E-01        |
| <i>GRM5</i>     | Chr 11     | 88237743  | 88799113  | 1107           | 3.01E-06        | 1107        | 6.24E-05        | 1107       | 2.28E-01        |
| <i>MAP2</i>     | Chr 2      | 210288770 | 210598834 | 604            | 9.75E-06        | 604         | 3.06E-03        | 604        | 4.26E-02        |
| <i>MINK1</i>    | Chr 17     | 4736634   | 4801356   | 337            | 3.59E-05        | 337         | 6.62E-03        | 337        | 6.76E-03        |
| <i>NAV1</i>     | Chr 1      | 201617449 | 201796102 | 459            | 8.70E-05        | 459         | 2.77E-06        | 459        | 4.74E-02        |
| <i>PITPNM2</i>  | Chr 12     | 123468026 | 123635285 | 170            | 1.44E-04        | 170         | 5.07E-05        | 170        | 6.97E-01        |
| <i>SHANK2</i>   | Chr 11     | 70313960  | 70935842  | 1234           | 5.55E-04        | 1234        | 5.35E-03        | 1234       | 2.99E-01        |
| <i>RIMS1</i>    | Chr 6      | 72596405  | 73112845  | 1139           | 6.93E-04        | 1139        | 1.07E-01        | 1139       | 5.17E-01        |
| <i>USP31</i>    | Chr 16     | 23072727  | 23160591  | 366            | 8.46E-04        | 366         | 1.10E-01        | 366        | 8.44E-02        |
| <i>SCN2A</i>    | Chr 2      | 166095911 | 166248820 | 491            | 1.05E-03        | 491         | 2.62E-02        | 491        | 6.84E-02        |
| <i>ARFGAP2</i>  | Chr 11     | 47185848  | 47198676  | 137            | 1.20E-03        | 137         | 4.93E-03        | 137        | 1.15E-01        |
| <i>LRRC7</i>    | Chr 1      | 70032867  | 70589171  | 1350           | 1.97E-03        | 1350        | 6.55E-02        | 1350       | 1.51E-01        |
| <i>SRCIN1</i>   | Chr 17     | 36686258  | 36762183  | 325            | 1.99E-03        | 325         | 1.10E-01        | 325        | 1.41E-01        |
| <i>ELFN2</i>    | Chr 22     | 37763999  | 37823505  | 367            | 2.01E-03        | 367         | 1.33E-02        | 367        | 6.12E-01        |
| <i>SHANK3</i>   | Chr 22     | 51113069  | 51171640  | 230            | 3.06E-03        | 230         | 7.00E-01        | 230        | 9.92E-03        |
| <i>PCLO</i>     | Chr 7      | 82383320  | 82792197  | 992            | 3.30E-03        | 992         | 1.06E-01        | 992        | 7.01E-02        |
| <i>ARHGEF2</i>  | Chr 1      | 155916629 | 155959864 | 138            | 3.45E-03        | 138         | 6.13E-03        | 138        | 8.52E-01        |
| <i>AGAP2</i>    | Chr 12     | 58118075  | 58135944  | 131            | 1.05E-02        | 131         | 5.13E-02        | 131        | 2.10E-01        |
| <i>DLGAP3</i>   | Chr 1      | 35331036  | 35370984  | 229            | 1.19E-02        | 229         | 4.34E-01        | 229        | 3.31E-01        |
| <i>DLGAP2</i>   | Chr 8      | 1449531   | 1656642   | 997            | 1.53E-02        | 997         | 4.07E-03        | 997        | 3.27E-01        |
| <i>GRIN2B</i>   | Chr 12     | 13714409  | 14133022  | 1141           | 1.80E-02        | 1141        | 3.14E-01        | 1141       | 4.69E-01        |
| <i>BAIAP2</i>   | Chr 17     | 79008946  | 79091232  | 599            | 1.85E-02        | 599         | 1.95E-01        | 599        | 9.55E-02        |
| <i>SIPA1L1</i>  | Chr 14     | 71933901  | 72206120  | 292            | 2.17E-02        | 292         | 7.79E-02        | 292        | 3.72E-01        |
| <i>SORBS2</i>   | Chr 4      | 186506597 | 186877870 | 1522           | 2.99E-02        | 1522        | 1.35E-01        | 1522       | 8.46E-01        |
| <i>MARK4</i>    | Chr 19     | 45754515  | 45808541  | 326            | 3.20E-02        | 326         | 2.18E-01        | 326        | 1.64E-01        |
| <i>TNIK</i>     | Chr 3      | 170780291 | 171178197 | 993            | 3.25E-02        | 993         | 1.10E-02        | 993        | 9.55E-01        |
| <i>DMXL2</i>    | Chr 15     | 51739920  | 51914967  | 351            | 3.64E-02        | 351         | 4.23E-03        | 351        | 1.17E-01        |
| <i>ARHGAP39</i> | Chr 8      | 145754562 | 145911194 | 116            | 4.05E-02        | 116         | 1.28E-01        | 116        | 4.83E-03        |
| <i>MARK2</i>    | Chr 11     | 63606399  | 63678492  | 214            | 6.26E-02        | 214         | 7.56E-02        | 214        | 6.58E-01        |
| <i>RAPGEF2</i>  | Chr 4      | 160188997 | 160281301 | 246            | 7.30E-02        | 246         | 2.16E-02        | 246        | 4.37E-01        |
| <i>CAMK2B</i>   | Chr 7      | 44256748  | 44365230  | 393            | 7.42E-02        | 393         | 1.58E-01        | 393        | 7.69E-01        |
| <i>LPPR4</i>    | Chr 1      | 99729847  | 99775138  | 226            | 7.96E-02        | 226         | 9.62E-03        | 226        | 6.63E-01        |
| <i>ANK3</i>     | Chr 10     | 61786055  | 62493284  | 1869           | 8.75E-02        | 1869        | 3.16E-02        | 1869       | 1.97E-02        |
| <i>RIMS2</i>    | Chr 8      | 104512975 | 105266656 | 2182           | 1.11E-01        | 2182        | 5.58E-01        | 2182       | 5.16E-01        |
| <i>DOCK7</i>    | Chr 1      | 62920396  | 63154039  | 330            | 1.41E-01        | 330         | 7.78E-01        | 330        | 6.56E-01        |
| <i>BSN</i>      | Chr 3      | 49591921  | 49708982  | 233            | 1.66E-01        | 233         | 4.36E-02        | 233        | 8.69E-01        |
| <i>MARK1</i>    | Chr 1      | 220701567 | 220837799 | 255            | 1.69E-01        | 255         | 5.34E-02        | 255        | 6.04E-01        |
| <i>MFF</i>      | Chr 2      | 228189866 | 228222552 | 381            | 1.75E-01        | 381         | 1.37E-01        | 381        | 2.28E-01        |
| <i>IQSEC1</i>   | Chr 3      | 12938541  | 13114617  | 656            | 1.75E-01        | 656         | 1.17E-02        | 656        | 1.33E-01        |
| <i>CEP170</i>   | Chr 1      | 243287729 | 243418708 | 170            | 1.87E-01        | 170         | 1.29E-01        | 170        | 4.70E-02        |

|           |        |           |           |      |          |      |          |      |          |
|-----------|--------|-----------|-----------|------|----------|------|----------|------|----------|
| ANKRD63   | Chr 15 | 40573644  | 40574787  | 202  | 1.87E-01 | 202  | 8.03E-01 | 202  | 1.63E-01 |
| SYNPO     | Chr 5  | 149980641 | 150038792 | 153  | 2.04E-01 | 153  | 2.27E-01 | 153  | 4.48E-01 |
| C2CD4C    | Chr 19 | 405442    | 409170    | 258  | 2.18E-01 | 258  | 3.39E-01 | 258  | 7.47E-01 |
| TBC1D10B  | Chr 16 | 30368421  | 30381522  | 63   | 2.38E-01 | 63   | 2.79E-01 | 63   | 9.47E-01 |
| MAST1     | Chr 19 | 12949258  | 12985766  | 121  | 2.64E-01 | 121  | 2.97E-01 | 121  | 1.39E-01 |
| TANC2     | Chr 17 | 61086897  | 61505067  | 380  | 2.93E-01 | 380  | 4.00E-01 | 380  | 5.47E-02 |
| DNM1      | Chr 9  | 130965662 | 131017527 | 213  | 0.31     | 213  | 0.052    | 213  | 0.55     |
| RAP1GAP2  | Chr 17 | 2699731   | 2941035   | 902  | 3.21E-01 | 902  | 4.51E-01 | 902  | 5.62E-02 |
| BRSK1     | Chr 19 | 55793439  | 55823903  | 236  | 3.25E-01 | 236  | 5.20E-01 | 236  | 7.89E-01 |
| ANKS1B    | Chr 12 | 99128568  | 100378432 | 2392 | 3.82E-01 | 2392 | 1.10E-01 | 2392 | 2.73E-01 |
| OSBPL6    | Chr 2  | 179059207 | 179264160 | 515  | 4.05E-01 | 515  | 4.09E-01 | 515  | 4.51E-01 |
| CASKIN1   | Chr 16 | 2227183   | 2246465   | 140  | 4.09E-01 | 140  | 8.71E-02 | 140  | 8.54E-01 |
| RAP1GAP   | Chr 1  | 21922707  | 21995856  | 456  | 4.27E-01 | 456  | 3.62E-01 | 456  | 5.02E-01 |
| ARHGAP21  | Chr 10 | 24872537  | 25012597  | 378  | 4.61E-01 | 378  | 8.37E-01 | 378  | 5.92E-01 |
| CAMSAP1   | Chr 9  | 138700332 | 138799005 | 332  | 0.47     | 332  | 0.59     | 332  | 0.29     |
| EXOC1     | Chr 4  | 56719815  | 56771244  | 240  | 4.95E-01 | 240  | 7.01E-01 | 240  | 2.36E-01 |
| CADPS     | Chr 3  | 62384020  | 62861064  | 1363 | 5.58E-01 | 1363 | 4.51E-01 | 1363 | 4.51E-01 |
| ABI1      | Chr 10 | 27035524  | 27150016  | 521  | 5.76E-01 | 521  | 4.51E-02 | 521  | 2.48E-01 |
| CACNA1E   | Chr 1  | 181452685 | 181775921 | 809  | 6.31E-01 | 809  | 6.03E-02 | 809  | 3.30E-01 |
| ARFGAP3   | Chr 22 | 43192531  | 43253408  | 405  | 6.71E-01 | 405  | 7.45E-01 | 405  | 8.93E-01 |
| GPRIN1    | Chr 5  | 176022802 | 176037131 | 211  | 6.96E-01 | 211  | 7.72E-01 | 211  | 2.14E-01 |
| CLASP2    | Chr 3  | 33537738  | 33759705  | 368  | 7.29E-01 | 368  | 1.05E-01 | 368  | 3.16E-01 |
| ABL2      | Chr 1  | 179068461 | 179198819 | 423  | 7.77E-01 | 423  | 6.50E-01 | 423  | 1.31E-01 |
| ILDR2     | Chr 1  | 166882440 | 166944561 | 190  | 8.15E-01 | 190  | 7.75E-01 | 190  | 1.74E-01 |
| STK32C    | Chr 10 | 134020995 | 134146063 | 620  | 8.27E-01 | 620  | 5.48E-01 | 620  | 3.91E-01 |
| RAB11FIP5 | Chr 2  | 73300509  | 73340146  | 299  | 9.23E-01 | 299  | 8.64E-01 | 299  | 5.86E-01 |
| CLASP1    | Chr 2  | 122095351 | 122407052 | 543  | 9.23E-01 | 543  | 8.61E-01 | 543  | 6.03E-01 |
| TRIO      | Chr 5  | 14143828  | 14509458  | 865  | 9.54E-01 | 865  | 8.04E-01 | 865  | 9.43E-01 |

**Supplementary Table 12.** Tissue enrichment analysis of gene expression in GTEx RNA-seq data using MAGMA. Significant tissue enrichments with  $P < 9.43 \times 10^{-04}$  for 53 tested tissues are bolded.

| Tissue                                | Sleep Duration |        |                 | Short Sleep |        |                 | Long Sleep |        |                 |
|---------------------------------------|----------------|--------|-----------------|-------------|--------|-----------------|------------|--------|-----------------|
|                                       | Beta           | SE     | P Value         | Beta        | SE     | P Value         | Beta       | SE     | P Value         |
| Brain_Cerebellar_Hemisphere           | 0.0556         | 0.0089 | <b>2.21E-10</b> | 0.0388      | 0.0079 | <b>5.27E-07</b> | 0.0265     | 0.0071 | <b>9.81E-05</b> |
| Brain_Cerebellum                      | 0.0559         | 0.0093 | <b>8.22E-10</b> | 0.0384      | 0.0082 | <b>1.61E-06</b> | 0.0261     | 0.0074 | <b>1.99E-04</b> |
| Brain_Frontal_Cortex_BA9              | 0.0593         | 0.0101 | <b>2.47E-09</b> | 0.0343      | 0.0090 | <b>6.91E-05</b> | 0.0208     | 0.0080 | 4.76E-03        |
| Brain_Cortex                          | 0.0581         | 0.0104 | <b>1.27E-08</b> | 0.0334      | 0.0092 | <b>1.49E-04</b> | 0.0197     | 0.0082 | 8.15E-03        |
| Brain_Anterior_cingulate_cortex_BA24  | 0.0584         | 0.0108 | <b>2.84E-08</b> | 0.0326      | 0.0095 | <b>3.13E-04</b> | 0.0173     | 0.0085 | 2.10E-02        |
| Brain_Nucleus_accumbens_basal_ganglia | 0.0573         | 0.0112 | <b>1.55E-07</b> | 0.0325      | 0.0099 | <b>5.17E-04</b> | 0.0070     | 0.0088 | 2.14E-01        |
| Brain_Caudate_basal_ganglia           | 0.0529         | 0.0118 | <b>3.62E-06</b> | 0.0310      | 0.0104 | 1.43E-03        | 0.0051     | 0.0092 | 2.89E-01        |
| Brain_Hippocampus                     | 0.0526         | 0.0120 | <b>6.17E-06</b> | 0.0316      | 0.0106 | 1.44E-03        | 0.0113     | 0.0094 | 1.14E-01        |
| Brain_Hypothalamus                    | 0.0525         | 0.0122 | <b>8.61E-06</b> | 0.0309      | 0.0107 | 2.00E-03        | 0.0055     | 0.0095 | 2.80E-01        |
| Brain_Putamen_basal_ganglia           | 0.0491         | 0.0119 | <b>1.77E-05</b> | 0.0282      | 0.0105 | 3.52E-03        | 0.0036     | 0.0093 | 3.48E-01        |
| Brain_Amygdala                        | 0.0467         | 0.0120 | <b>4.72E-05</b> | 0.0270      | 0.0106 | 5.33E-03        | 0.0074     | 0.0094 | 2.16E-01        |
| Pituitary                             | 0.0446         | 0.0135 | <b>5.03E-04</b> | 0.0252      | 0.0118 | 1.61E-02        | 0.0156     | 0.0102 | 6.39E-02        |
| Brain_Substantia_nigra                | 0.0348         | 0.0133 | 4.47E-03        | 0.0176      | 0.0117 | 6.59E-02        | 0.0040     | 0.0103 | 3.47E-01        |
| Testis                                | 0.0150         | 0.0077 | 2.66E-02        | 0.0118      | 0.0069 | 4.27E-02        | 0.0035     | 0.0062 | 2.84E-01        |
| Brain_Spinal_cord_cervical_c.1        | 0.0155         | 0.0131 | 1.20E-01        | 0.0179      | 0.0115 | 5.99E-02        | 0.0032     | 0.0102 | 3.78E-01        |
| Cells_EBV.transformed_lymphocytes     | 0.0069         | 0.0073 | 1.71E-01        | 0.0008      | 0.0065 | 4.50E-01        | 0.0122     | 0.0059 | 1.93E-02        |
| Cells_Transformed_fibroblasts         | 0.0015         | 0.0108 | 4.47E-01        | 0.0026      | 0.0096 | 3.94E-01        | 0.0020     | 0.0085 | 4.07E-01        |
| Ovary                                 | -0.0021        | 0.0152 | 5.55E-01        | 0.0224      | 0.0131 | 4.33E-02        | -0.0055    | 0.0114 | 6.85E-01        |
| Uterus                                | -0.0136        | 0.0191 | 7.61E-01        | -0.0013     | 0.0162 | 5.33E-01        | -0.0041    | 0.0137 | 6.17E-01        |
| Colon_Sigmoid                         | -0.0153        | 0.0209 | 7.68E-01        | -0.0088     | 0.0176 | 6.91E-01        | -0.0171    | 0.0148 | 8.75E-01        |
| Muscle_Skeletal                       | -0.0076        | 0.0100 | 7.77E-01        | -0.0117     | 0.0089 | 9.05E-01        | 0.0029     | 0.0080 | 3.61E-01        |
| Whole_Blood                           | -0.0080        | 0.0080 | 8.40E-01        | -0.0084     | 0.0072 | 8.79E-01        | 0.0013     | 0.0066 | 4.20E-01        |
| Cervix_Endocervix                     | -0.0211        | 0.0208 | 8.44E-01        | -0.0165     | 0.0175 | 8.27E-01        | -0.0107    | 0.0146 | 7.68E-01        |
| Artery_Tibial                         | -0.0236        | 0.0163 | 9.27E-01        | -0.0138     | 0.0140 | 8.38E-01        | -0.0189    | 0.0121 | 9.40E-01        |
| Nerve_Tibial                          | -0.0266        | 0.0179 | 9.31E-01        | -0.0057     | 0.0152 | 6.45E-01        | -0.0076    | 0.0128 | 7.23E-01        |
| Esophagus_Muscularis                  | -0.0314        | 0.0208 | 9.34E-01        | -0.0252     | 0.0176 | 9.24E-01        | -0.0098    | 0.0148 | 7.46E-01        |
| Esophagus_Gastroesophageal_Junction   | -0.0360        | 0.0221 | 9.49E-01        | -0.0236     | 0.0186 | 8.98E-01        | -0.0188    | 0.0155 | 8.88E-01        |
| Cervix_Ectocervix                     | -0.0409        | 0.0233 | 9.61E-01        | -0.0284     | 0.0195 | 9.28E-01        | -0.0127    | 0.0161 | 7.85E-01        |
| Fallopian_Tube                        | -0.0379        | 0.0216 | 9.61E-01        | -0.0196     | 0.0181 | 8.61E-01        | -0.0162    | 0.0150 | 8.60E-01        |
| Adrenal_Gland                         | -0.0278        | 0.0154 | 9.65E-01        | -0.0055     | 0.0133 | 6.59E-01        | 0.0009     | 0.0115 | 4.69E-01        |
| Thyroid                               | -0.0321        | 0.0165 | 9.74E-01        | -0.0215     | 0.0141 | 9.37E-01        | -0.0062    | 0.0120 | 6.97E-01        |
| Skin_Not_Sun_Exposed_Suprapubic       | -0.0234        | 0.0119 | 9.76E-01        | -0.0204     | 0.0104 | 9.75E-01        | -0.0043    | 0.0092 | 6.82E-01        |
| Prostate                              | -0.0430        | 0.0207 | 9.81E-01        | -0.0389     | 0.0174 | 9.88E-01        | -0.0142    | 0.0145 | 8.36E-01        |
| Skin_Sun_Exposed_Lower_leg            | -0.0248        | 0.0118 | 9.82E-01        | -0.0218     | 0.0104 | 9.82E-01        | -0.0068    | 0.0091 | 7.73E-01        |
| Heart_Atrial_Appendage                | -0.0334        | 0.0146 | 9.89E-01        | -0.0200     | 0.0127 | 9.43E-01        | -0.0209    | 0.0111 | 9.70E-01        |
| Heart_Left_Ventricle                  | -0.0305        | 0.0131 | 9.90E-01        | -0.0243     | 0.0115 | 9.83E-01        | -0.0176    | 0.0102 | 9.58E-01        |

|                                |         |        |          |         |        |          |         |        |          |
|--------------------------------|---------|--------|----------|---------|--------|----------|---------|--------|----------|
| Bladder                        | -0.0488 | 0.0208 | 9.91E-01 | -0.0338 | 0.0175 | 9.73E-01 | -0.0209 | 0.0146 | 9.24E-01 |
| Artery_Aorta                   | -0.0404 | 0.0167 | 9.92E-01 | -0.0206 | 0.0143 | 9.25E-01 | -0.0164 | 0.0123 | 9.09E-01 |
| Colon_Transverse               | -0.0457 | 0.0174 | 9.96E-01 | -0.0351 | 0.0148 | 9.91E-01 | -0.0168 | 0.0126 | 9.08E-01 |
| Vagina                         | -0.0521 | 0.0194 | 9.96E-01 | -0.0334 | 0.0164 | 9.79E-01 | -0.0201 | 0.0138 | 9.28E-01 |
| Kidney_Cortex                  | -0.0394 | 0.0146 | 9.97E-01 | -0.0224 | 0.0126 | 9.62E-01 | -0.0180 | 0.0110 | 9.50E-01 |
| Minor_Salivary_Gland           | -0.0423 | 0.0157 | 9.97E-01 | -0.0325 | 0.0135 | 9.92E-01 | -0.0183 | 0.0116 | 9.42E-01 |
| Esophagus_Mucosa               | -0.0309 | 0.0114 | 9.97E-01 | -0.0212 | 0.0100 | 9.83E-01 | -0.0061 | 0.0089 | 7.54E-01 |
| Stomach                        | -0.0549 | 0.0200 | 9.97E-01 | -0.0363 | 0.0170 | 9.84E-01 | -0.0361 | 0.0144 | 9.94E-01 |
| Spleen                         | -0.0307 | 0.0109 | 9.98E-01 | -0.0260 | 0.0096 | 9.97E-01 | 0.0050  | 0.0084 | 2.78E-01 |
| Pancreas                       | -0.0414 | 0.0129 | 9.99E-01 | -0.0220 | 0.0114 | 9.73E-01 | -0.0144 | 0.0101 | 9.23E-01 |
| Small_Intestine_Terminal_Ileum | -0.0424 | 0.0130 | 9.99E-01 | -0.0272 | 0.0113 | 9.92E-01 | -0.0056 | 0.0098 | 7.17E-01 |
| Liver                          | -0.0301 | 0.0091 | 1.00     | -0.0121 | 0.0081 | 9.32E-01 | -0.0039 | 0.0073 | 7.03E-01 |
| Artery_Coronary                | -0.0701 | 0.0204 | 1.00     | -0.0358 | 0.0172 | 9.82E-01 | -0.0237 | 0.0144 | 9.49E-01 |
| Lung                           | -0.0574 | 0.0154 | 1.00     | -0.0307 | 0.0132 | 9.90E-01 | -0.0155 | 0.0113 | 9.15E-01 |
| Adipose_Subcutaneous           | -0.0676 | 0.0179 | 1.00     | -0.0349 | 0.0152 | 9.89E-01 | -0.0178 | 0.0129 | 9.16E-01 |
| Adipose_Visceral_Omentum       | -0.0743 | 0.0185 | 1.00     | -0.0288 | 0.0156 | 9.67E-01 | -0.0219 | 0.0133 | 9.50E-01 |
| Breast_Mammary_Tissue          | -0.0896 | 0.0225 | 1.00     | -0.0488 | 0.0187 | 9.95E-01 | -0.0242 | 0.0155 | 9.41E-01 |

MAGMA analysis conditioned on gene size, log gene size, gene density, log gene density, inverse minor allele count, and log inverse minor allele count.

**Supplementary Table 13.** Causal links of sleep duration (in minutes) with health outcomes using Mendelian Randomization.

| Outcome                            | Study      | PMID     | SNPs | Inverse Variance Weighted |       |                 | MR Egger        |       |                 | Weighted Median |       |                 |
|------------------------------------|------------|----------|------|---------------------------|-------|-----------------|-----------------|-------|-----------------|-----------------|-------|-----------------|
|                                    |            |          |      | Beta/<br>log OR           | SE    | P value         | Beta/<br>log OR | SE    | P value         | Beta/<br>log OR | SE    | P value         |
| Insomnia, log OR                   | UK Biobank | N/A      | 73   | -0.004                    | 0.000 | <b>2.87E-24</b> | -0.006          | 0.001 | <b>8.70E-06</b> | -0.004          | 0.000 | <b>1.32E-26</b> |
| Schizophrenia, log OR              | PGC        | 25056061 | 67   | 0.0088                    | 0.003 | <b>3.70E-03</b> | 0.015           | 0.011 | 0.20            | 0.008           | 0.003 | <b>3.95E-03</b> |
| Bipolar disorder, log OR           | PGC        | 21926972 | 53   | 0.006                     | 0.004 | 1.52E-01        | 0.0002          | 0.018 | 0.99            | 0.001           | 0.006 | 8.90E-01        |
| PGC cross-disorder traits, log OR  | PGC        | 23453885 | 48   | 0.003                     | 0.002 | 2.11E-01        | 0.001           | 0.010 | 0.95            | 0.001           | 0.003 | 8.62E-01        |
| Age at menarche, years             | ReproGen   | 25231870 | 53   | 0.003                     | 0.001 | 3.74E-02        | 0.0001          | 0.006 | 0.98            | 0.002           | 0.002 | 2.82E-01        |
| Body mass index, kg/m <sup>2</sup> | GIANT      | 25673413 | 53   | 0.001                     | 0.001 | 0.42            | 0.001           | 0.003 | 0.72            | 0.001           | 0.001 | 0.41            |
| Type 2 diabetes, log OR            | DIAGRAM    | 24509480 | 52   | 0.001                     | 0.003 | 0.67            | -0.009          | 0.010 | 0.40            | 0.000           | 0.004 | 1.00            |

Beta is the estimated effect of change on outcome in units indicated (continuous) or log odds ratio for case/control traits using the SNPs associated with sleep duration with available proxies in each study (number of SNPs used indicated in the SNPs column) using effect estimates for sleep duration in minutes (Supplementary Data 1). Three Mendelian Randomization methods were used. Each outcome was obtained from publicly available GWAS summary data. The number of SNPs used varies for each outcome because of not being able to find some of the 78 SNPs (or proxies) in the summary data.

**Supplementary Table 14.** Bidirectional causal links of sleep duration (in minutes) with schizophrenia (log odds ratio) using two-sample Mendelian Randomization.

| Exposure                                                   | Outcome                                           | SNPs | Inverse Variance Weighted |       |                 | MR Egger |       |         | Weighted Median |       |                 |
|------------------------------------------------------------|---------------------------------------------------|------|---------------------------|-------|-----------------|----------|-------|---------|-----------------|-------|-----------------|
|                                                            |                                                   |      | Beta                      | SE    | P value         | Beta     | SE    | P value | Beta            | SE    | P value         |
| Sleep duration (UK Biobank - baseline adjustment)          | Schizophrenia (PGC)                               | 67   | 0.009                     | 0.003 | <b>3.70E-03</b> | 0.015    | 0.011 | 0.20    | 0.008           | 0.003 | <b>3.95E-03</b> |
| Sleep duration (UK Biobank - BMI adjustment)               | Schizophrenia (PGC)                               | 65   | 0.009                     | 0.003 | <b>5.18E-03</b> | 0.016    | 0.012 | 0.18    | 0.008           | 0.003 | <b>5.12E-03</b> |
| Sleep duration (UK Biobank - insomnia adjustment)          | Schizophrenia (PGC)                               | 43   | 0.009                     | 0.003 | <b>8.48E-03</b> | 0.012    | 0.012 | 0.34    | 0.009           | 0.003 | <b>1.05E-02</b> |
| Sleep duration (UK Biobank - lifestyle adjustment)         | Schizophrenia (PGC)                               | 48   | 0.008                     | 0.003 | <b>2.03E-02</b> | 0.011    | 0.012 | 0.37    | 0.008           | 0.003 | <b>1.46E-02</b> |
| Sleep duration (UK Biobank - only meta-analysis GWAS loci) | Schizophrenia (PGC)                               | 48   | 0.006                     | 0.003 | 6.16E-02        | 0.0157   | 0.012 | 0.20    | 0.008           | 0.003 | <b>8.14E-03</b> |
| Exposure                                                   | Outcome                                           | SNPs | Log OR                    | SE    | P value         | Log OR   | SE    | P value | Log OR          | SE    | P value         |
| Schizophrenia (PGC)                                        | Sleep duration (UK Biobank - baseline adjustment) | 69   | 0.025                     | 0.007 | <b>6.05E-04</b> | 0.026    | 0.027 | 0.35    | 0.026           | 0.006 | <b>3.36E-05</b> |

**Abbreviations:** MR =Mendelian randomization; OR =odds ratio
